# Supplementary material for: Suzuki–Miyaura Reaction in the Presence of N-Acetylcysteamine Thioesters Enables Rapid Synthesis of Biomimetic Polyketide Thioester Surrogates for Biosynthetic Studies
Source: MDPI journal article supplement (doi:10.3390/chemistry5020096), 2023-06-08
Supplement: s1 [file s1]

Archive with 1 entries (1 files):
- chemistry-2399137-supplementary.pdf
