# Supplementary material for: Suzuki–Miyaura Reaction in the Presence of N-Acetylcysteamine Thioesters Enables Rapid Synthesis of Biomimetic Polyketide Thioester Surrogates for Biosynthetic Studies
Source: MDPI journal article supplement (doi:10.3390/chemistry5020096), 2023-06-08
Supplement: s1 [file s1 › chemistry-2399137-supplementary.pdf]

# *Supporting Information*

## **Suzuki–Miyaura Reaction in the Presence of N-Acetylcysteamine Thioesters Enables Rapid Synthesis of Biomimetic Polyketide Thioester Surrogates for Biosynthetic Studies**

SSebastian Derra, Luca Schlotte and Frank Hahn \*

Department of Chemistry, Faculty Biology, Chemistry and Earth Sciences, Universität, Bayreuth, 95447 Bayreuth, Germany; [sebastian1.derra@uni-bayreuth.de](mailto:sebastian1.derra@uni-bayreuth.de) (S.D.)

\* Correspondence: [frank.hahn@uni-bayreuth.de](mailto:frank.hahn@uni-bayreuth.de)

# Table of Content

|                                         |    |
|-----------------------------------------|----|
| Synthetic reactions .....               | 3  |
| References Supporting Information ..... | 25 |
| NMR-Spectra .....                       | 26 |

## Synthetic reactions

### *N*-acetylcysteamine (**34**)

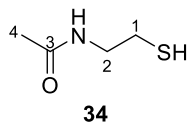

A solution of Cysteamine hydrochloride (30.0 g, 264 mmol, 1.0 equiv.) in H<sub>2</sub>O (300 mL, 0.88 M) was cooled to 0 °C. NaOH (84.5 g, 2.11 mol, 8.0 equiv.) was added in small portions. After dropwise addition of acetic anhydride (68.0 mL, 719 mmol, 2.7 equiv.) the mixture was stirred for 1 h at room temperature. A pH of 7 was adjusted by adding concentrated HCl solution. The resulting phases were separated and the aqueous one was extracted three times with CH<sub>2</sub>Cl<sub>2</sub>. Subsequently, the combined organic phases were washed with brine, dried over MgSO<sub>4</sub> and filtrated. Removal of the solvent *in vacuo* yielded *N*-Acetylcysteamine (**34**, 26.3 g, 221 mmol, 84%) as colourless oil.

**<sup>1</sup>H-NMR** (500 MHz, CDCl<sub>3</sub>):  $\delta$  = 5.92 (br, 1H, NH), 3.45-3.41 (m, 2H, 2-H), 2.67 (dt,  $J$  = 8.4, 6.4 Hz, 2H, 1-H), 2.01 (s, 3H, 4-H), 1.35 (t,  $J$  = 8.4 Hz, 1H, SH) ppm.

Analytical data are in accordance with those reported in the literature.<sup>[1]</sup>

### (*E*)-3-bromo-2-methylacrylic acid (**35**)

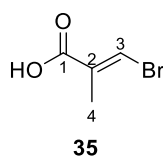

A solution of methacrylic acid (1.69 mL, 20.0 mmol, 1.00 equiv.) in CHCl<sub>3</sub> (25.0 mL, 0.8 M) was heated to 45 °C. Bromine (1.04 mL, 20.4 mmol, 1.02 equiv.) was added and the mixture was stirred for 1.5 h. After cooling down to room temperature, saturated aqueous NaHCO<sub>3</sub> solution was added and the resulting phases were separated. The organic phase was extracted three times with saturated aqueous NaHCO<sub>3</sub> solution and the combined aqueous phases were added to an aqueous KOH solution (25%, 150 mL). After stirring for three hours at room temperature, a pH < 3 was adjusted with concentrated HCl. Subsequently, the aqueous solution was extracted three times with Et<sub>2</sub>O and the combined organics were dried over MgSO<sub>4</sub> and filtered. Removal of the solvent *in vacuo* yielded crude **35** which was used directly in the next step without further purification. Only a small amount was recrystallised from hexane for analytical purposes and obtained from this as white, needle-shaped crystals.

**<sup>1</sup>H-NMR** (500 MHz, CDCl<sub>3</sub>): δ = 7.71 (s, 1H, 3-H), 2.01 (s, 3H, 4-H) ppm.

Analytical data are in accordance with those reported in the literature.<sup>[2]</sup>

***S*-(2-acetamidoethyl) (*E*)-3-bromo-2-methylprop-2-enethioate (**13a**)**

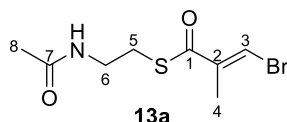

The reaction was carried out as described in general procedure 1. A solution of brominated methacrylic acid **35** (3.30 g, 20.0 mmol, 1.0 equiv.) and HSNAC **34** (3.57 g, 30.0 mmol, 1.5 equiv.) in CH<sub>2</sub>Cl<sub>2</sub> (100 mL, 0.2 M), DMAP (244 mg, 2.00 mmol, 0.1 equiv.) and EDC\*HCl (5.75 g, 30.0 mmol, 1.5 equiv.) were used. Purification by flash chromatography (SiO<sub>2</sub>, cyclohexane:EtOAc / 1:1 → EtOAc) yielded product **13a** (4.52 g, 17.0 mmol, 85% over two steps) as a white solid.

**R<sub>f</sub>**: (cyclohexane:EtOAc / 1:1) = 0.24; (EtOAc) = 0.35. **<sup>1</sup>H-NMR** (500 MHz, CDCl<sub>3</sub>): δ = 7.56 (q, *J* = 1.3 Hz, 1H, 3-H), 5.82 (br, 1H, NH), 3.48-3.44 (m, 2H, 6-H), 3.11 (t, *J* = 6.4 Hz, 2H, 5-H), 2.05 (d, *J* = 1.3 Hz, 3H, 4-H), 1.97 (s, 3H, 8-H) ppm. **<sup>13</sup>C-NMR** (125 MHz, CDCl<sub>3</sub>): δ = 190.8 (q, C-1), 170.4 (q, C-7), 141.6 (q, C-2), 122.0 (t, C-3), 39.6 (s, C-6), 29.0 (s, C-5), 23.4 (p, C-8), 16.0 (p, C-4) ppm. **HRMS** [ESI<sup>+</sup>]: *m/z* for C<sub>8</sub>H<sub>13</sub>O<sub>2</sub>N<sup>79</sup>BrS [M+H]<sup>+</sup>: calculated = 265.9844, found = 265.9838; *m/z* for C<sub>8</sub>H<sub>13</sub>O<sub>2</sub>N<sup>81</sup>BrS [M+H]<sup>+</sup>: calculated = 267.9824, found = 267.9814. Melting point: 46 °C.

***S*-(2-acetamidoethyl) (*E*)-3-iodo-2-methylprop-2-enethioate (**13b**)**

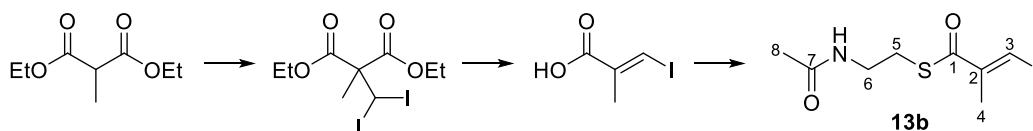

A suspension of NaH (1.44 g, 36 mmol, 1.2 equiv.) in Et<sub>2</sub>O (10 mL) was cooled to 0 °C. Subsequently, a solution of diethyl methylmalonate (5.11 mL, 30.0 mmol, 1.0 equiv.) in Et<sub>2</sub>O (50.0 mL, 0.6 M) was added dropwise. After heating on reflux for 1.5 h, iodoform (11.8 g, 30.0 mmol, 1.0 equiv.) was added in one portion and heating was continued for 18 h. The reaction was quenched by addition of HCl (1 M) and H<sub>2</sub>O. The resulting phases were separated and the aqueous one was extracted three times with Et<sub>2</sub>O. Subsequently, the combined organic

phases were washed with brine, dried over  $\text{MgSO}_4$  and filtrated. The crude product was directly used in the next step without further purification.

Crude alkylation product was dissolved in EtOH (90 mL), before  $\text{H}_2\text{O}$  (32 mL) and KOH (8.40 g, 150 mmol, 5.0 equiv.) were added. After heating on reflux for 4 h, the solvent was removed *in vacuo* and the residue was dissolved in aqueous  $\text{K}_2\text{CO}_3$ -solution (10%). A pH < 3 was adjusted with concentrated HCl, the aqueous solution was extracted three times with  $\text{Et}_2\text{O}$  and the combined organics were dried over  $\text{MgSO}_4$  and filtered. Removal of the solvent *in vacuo* yielded crude carboxylic acid which was used in the next step without further purification.

The esterification was carried out as described in general procedure 1. A solution of crude iodinated methacrylic acid and HSNAC **34** (5.36 g, 45.0 mmol, 1.5 equiv.) in  $\text{CH}_2\text{Cl}_2$  (150 mL, 0.2 M), DMAP (364 mg, 3.00 mmol, 0.1 equiv.) and EDC\*HCl (8.54 g, 45.0 mmol, 1.5 equiv.) were used. Purification by flash chromatography ( $\text{SiO}_2$ , cyclohexane:EtOAc / 1:1) yielded product **13b** (6.67 g, 21.3 mmol, 71% over three steps) as a yellowish solid.

**R<sub>f</sub>**: (EtOAc) = 0.45. **<sup>1</sup>H-NMR** (500 MHz,  $\text{CDCl}_3$ ):  $\delta$  = 7.86 (q,  $J$  = 1.1 Hz, 1H, 3-H), 5.83 (br, 1H, NH), 3.48-3.44 (m, 2H, 6-H), 3.09 (t,  $J$  = 6.4 Hz, 2H, 5-H), 2.09 (d,  $J$  = 1.1 Hz, 3H, 4-H), 1.97 (s, 3H, 8-H) ppm. **<sup>13</sup>C-NMR** (125 MHz,  $\text{CDCl}_3$ ):  $\delta$  = 189.8 (q, C-1), 170.4 (q, C-7), 147.2 (q, C-2), 97.7 (t, C-3), 39.5 (s, C-6), 29.2 (s, C-5), 23.4 (p, C-8), 20.6 (p, C-4) ppm. **HRMS** [ $\text{ESI}^+$ ]:  $m/z$  for  $\text{C}_8\text{H}_{13}\text{O}_2\text{NIS}$  [ $\text{M}+\text{H}$ ] $^+$ : calculated = 313.9706, found = 313.9702. Melting point: 59 °C.

#### ***tert*-butyldimethyl(oct-1-en-3-yloxy)silane (**14**)**

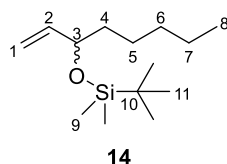

The reaction was carried out as described in general procedure 2. A solution of 1-octen-3-ol (200 mg, 1.56 mmol, 1.0 equiv.) in DMF (1.56 mL, 1 M), TBSCl (351 mg, 2.34 mmol, 1.5 equiv.) and Imidazole (265 mg, 3.90 mmol, 2.5 equiv.) were used. Purification by filtration over a short plug of silica ( $\text{SiO}_2$ , pentane) yielded product **14** (378 mg, 1.56 mmol, quant.) as a colourless liquid.

**R<sub>f</sub>**: (pentane) = 0.56. **<sup>1</sup>H-NMR** (500 MHz, CDCl<sub>3</sub>):  $\delta$  = 5.79 (ddd,  $J$  = 17.0, 10.3, 6.0 Hz, 1H, 2-H), 5.13 (ddd,  $J$  = 17.0, 1.9, 1.3 Hz, 1H, 1  $\times$  1-H), 5.01 (ddd,  $J$  = 10.3, 1.9, 1.3 Hz, 1H, 1  $\times$  1-H), 4.09-4.05 (m, 1H, 3-H), 1.51-1.40 (m, 2H, 4-H), 1.35-1.24 (m, 6H, 5-H, 6-H, 7-H), 0.89-0.86 (m, 12H, 11-H, 8-H), 0.05 (s, 3H, 9-H), 0.03 (s, 3H, 9-H) ppm.

Analytical data are in accordance with those reported in the literature.<sup>[3]</sup>

***S*-(2-acetamidoethyl) (*E*)-6-((*tert*-butyldimethylsilyl)oxy)-2-methylundec-2-enethioate  
(15)**

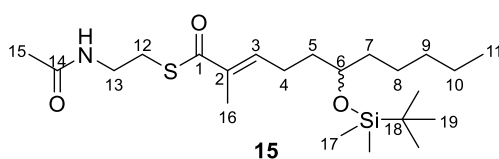

The reaction was carried out as described in general procedure 3. A solution of alkene **14** (50.0 mg, 206  $\mu$ mol, 1.5 equiv.) in THF (137  $\mu$ L, 1 M), 9-BBN (412  $\mu$ L, 206  $\mu$ mol, 1.5 equiv., 0.5 M in THF), DMF (685  $\mu$ L, total 0.2 M), vinyl iodide **13b** (43.0 mg, 137  $\mu$ mol, 1.0 equiv.), PdCl<sub>2</sub>(dppf) (5.0 mg, 7.00  $\mu$ mol, 5 mol%), AsPh<sub>3</sub> (2.1 mg, 7.00  $\mu$ mol, 5 mol%) and Cs<sub>2</sub>CO<sub>3</sub> (89.0 mg, 275  $\mu$ mol, 2.0 equiv.) were used. Purification by flash chromatography (SiO<sub>2</sub>, cyclohexane:EtOAc / 1:1) yielded product **15** (45.2 mg, 107  $\mu$ mol, 78%) as a brown oil.

**R<sub>f</sub>**: (cyclohexane:EtOAc / 1:1) = 0.45; **<sup>1</sup>H-NMR** (500 MHz, CDCl<sub>3</sub>):  $\delta$  = 6.78 (tq,  $J$  = 7.3, 1.3 Hz, 1H, 3-H), 5.85 (br, 1H, NH), 3.71-3.66 (m, 1H, 6-H), 3.47-3.43 (m, 2H, 13-H), 3.07 (t,  $J$  = 6.3 Hz, 2H, 12-H), 2.34-2.17 (m, 2H, 4-H), 1.96 (s, 3H, 15-H), 1.88 (s, 3H, 16-H), 1.60-1.53 (m, 2H, 5-H), 1.47-1.41 (m, 2H, 7-H), 1.32-1.26 (m, 6H, 8-H, 9-H, 10-H), 0.90-0.87 (m, 12H, 19-H, 11-H), 0.06 (s, 3H, 17-H), 0.05 (s, 3H, 17-H) ppm. **<sup>13</sup>C-NMR** (125 MHz, CDCl<sub>3</sub>):  $\delta$  = 194.2 (q, C-1), 170.4 (q, C-14), 142.5 (t, C-3), 135.9 (q, C-2), 71.8 (t, C-6), 40.0 (s, C-13), 37.1 (s, C-7), 35.6 (s, C-5), 32.2 (s, C-9), 28.5 (s, C-12), 26.0 (p, C-19), 25.1 (s, C-8), 24.8 (s, C-4), 23.4 (p, C-15), 22.8 (s, C-10), 18.3 (q, C-18), 14.2 (p, C-11), 12.6 (p, C-16), -4.2 (p, C-17), -4.3 (p, C-17) ppm. **HRMS** [ESI<sup>+</sup>]:  $m/z$  for C<sub>22</sub>H<sub>44</sub>NO<sub>3</sub>SSi [M+H]<sup>+</sup>: calculated = 430.2805, found = 430.2796.

### ***S*-(2-acetamidoethyl) (*E*)-6-hydroxy-2-methylundec-2-enethioate (**16**)**

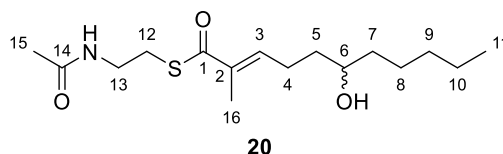

A solution of silylether **15** (20.0 mg, 46.5  $\mu\text{mol}$ , 1.0 eq.) in MeOH (465  $\mu\text{L}$ , 0.1 M) was treated with PPTS (70.0 mg, 279  $\mu\text{mol}$ , 6.0 eq.). After stirred heating to 50  $^{\circ}\text{C}$  overnight, the reaction was quenched by the addition of water and Et<sub>2</sub>O. The resulting phases were separated and the aqueous one was extracted three times with Et<sub>2</sub>O. Subsequently, the combined organic phases were washed with brine, dried over MgSO<sub>4</sub> and filtrated. Removal of the solvent in vacuo and purifying *via* flash chromatography (SiO<sub>2</sub>, EtOAc) yielded secondary alcohol **16** (7.3 mg, 24.2  $\mu\text{mol}$ , 52%) as a colourless oil.

**R<sub>f</sub>**: (EtOAc) = 0.29. **<sup>1</sup>H-NMR** (500 MHz, CDCl<sub>3</sub>):  $\delta$  = 6.78 (tq,  $J$  = 7.3, 1.2 Hz, 1H, 3-H), 5.92 (br, 1H, NH), 3.63-3.59 (m, 1H, 6-H), 3.46-3.42 (m, 2H, 13-H), 3.06 (t,  $J$  = 6.3 Hz, 2H, 12-H), 2.41-2.27 (m, 2H, 4-H), 1.96 (s, 3H, 15-H), 1.89 (s, 3H, 16-H), 1.70 (br, 1H, OH), 1.66-1.54 (m, 2H, 5-H), 1.46-1.41 (m, 3H, 7-H, 1  $\times$  8-H), 1.33-1.24 (m, 5H, 1  $\times$  8-H, 9-H, 10-H), 0.89 (t,  $J$  = 6.9 Hz, 3H, 11-H) ppm. **<sup>13</sup>C-NMR** (125 MHz, CDCl<sub>3</sub>):  $\delta$  = 194.2 (q, C-1), 170.4 (q, C-14), 141.8 (t, C-3), 136.2 (q, C-2), 71.5 (t, C-6), 40.0 (s, C-13), 37.8 (s, C-7), 36.0 (s, C-5), 32.0 (s, C-9), 28.5 (s, C-12), 25.4 (s, C-8), 25.3 (s, C-4), 23.4 (p, C-15), 22.8 (s, C-10), 14.2 (p, C-11), 12.6 (p, C-16) ppm. **HRMS** [ESI<sup>+</sup>]:  $m/z$  for C<sub>16</sub>H<sub>30</sub>NO<sub>3</sub>S [M+H]<sup>+</sup>: calculated = 316.1940, found = 316.1934.

### **ethyl 2-iodobutanoate (**36**)**

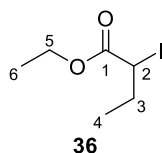

To a light protected, stirred suspension of sodium iodide (28.4 g, 190 mmol, 2.0 equiv.) in acetone (63.2 mL, 1.5 M) was added ethyl 2-bromobutanoate (14.0 mL, 94.8 mmol, 1.0 equiv.). After 30 minutes, excess Et<sub>2</sub>O (200 mL) was added and the suspension was filtered. Washing the organic solution with saturated aqueous Na<sub>2</sub>S<sub>2</sub>O<sub>3</sub> solution and brine and removing the solvent *in vacuo* yielded **36** (21.2 g, 87.7 mmol, 93%) as a light sensitive, colourless liquid.

**<sup>1</sup>H-NMR** (500 MHz, CDCl<sub>3</sub>):  $\delta$  = 4.26-4.17 (m, 3H, 5-H, 2-H), 2.04-1.95 (m, 2H, 3-H), 1.28 (t,  $J$  = 7.1 Hz, 3H, 6-H), 0.97 (t,  $J$  = 7.3 Hz, 3H, 4-H) ppm. **<sup>13</sup>C-NMR** (125 MHz, CDCl<sub>3</sub>):  $\delta$  = 171.5 (q, C-1), 61.9 (s, C-5), 29.7 (s, C-3), 23.5 (t, C-2), 14.2 (p, C-4), 13.9 (p, C6) ppm. **EA**: calculated for C<sub>6</sub>H<sub>11</sub>IO<sub>2</sub>: C = 29.77, H = 4.58; found: C = 30.01, H = 4.56.

**ethyl 2-(triphenyl- $\lambda^5$ -phosphaneylidene)butanoate (**37**)**

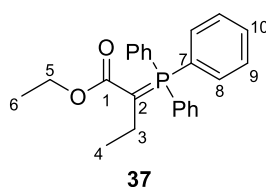

To a light protected, stirred solution of Iodide **36** (21.2 g, 87.7 mmol, 1.0 equiv.) in toluene (58.0 mL, 1.5 M) was added PPh<sub>3</sub> (45.9 g, 175 mmol, 2.0 equiv.). After heating to 65 °C overnight, the supernatant was carefully removed and the residue was washed with toluene. Subsequently, CH<sub>2</sub>Cl<sub>2</sub> and an aqueous K<sub>2</sub>CO<sub>3</sub> solution (10%) were added and the emulsion was stirred for 40 minutes at room temperature. The resulting phases were separated and the aqueous one was extracted three times with CH<sub>2</sub>Cl<sub>2</sub>. Subsequently, the combined organic phases were washed with brine, dried over MgSO<sub>4</sub> and filtrated. Removal of the solvent *in vacuo* yielded crude **37** (31.2 g, 82.8 mmol, 95%) as viscous, yellow oil which was used directly in the next step without further purification.

**<sup>1</sup>H-NMR** (500 MHz, CDCl<sub>3</sub>):  $\delta$  = 7.64-7.60 (m, 6H, 9-H), 7.55-7.52 (m, 3H, 10-H), 7.46-7.44 (m, 6H, 8-H), 4.05 (br, 0.5H, 5-H), 3.69 (br, 1.5H, 5-H), 1.96 (br, 2H, 3-H), 1.24 (br, 1H, 1  $\times$  6-H), 0.86 (t,  $J$  = 7.1 Hz, 3H, 4-H), 0.42 (br, 2H, 2  $\times$  6-H) ppm.

Analytical data are in accordance with those reported in the literature.<sup>[4]</sup>

**ethyl (2*E*,4*E*)-2-ethylhexa-2,4-dienoate (**38**)**

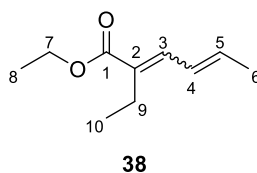

A stirred solution of phosphorous ylide **37** (30.6 g, 81.3 mmol, 1.5 equiv.) and crotonaldehyde (4.47 mL, 54.2 mmol, 1.0 equiv.) in toluene (162 mL, 0.5 M) was heated to 70 °C for 5 h.

Afterwards it was allowed to cool to room temperature and stirred overnight. Removal of the solvent *in vacuo* and purification *via* flash chromatography (SiO<sub>2</sub>, cyclohexane → cyclohexane:EtOAc / 39:1) yielded ethyl ester **38** (8.94 g, 53.1 mmol, 98%, *E:Z* = 10:1) as colourless liquid.

Major (*E*)-isomer: **R<sub>f</sub>** : (cyclohexane:EtOAc / 39:1) = 0.27. **<sup>1</sup>H-NMR** (500 MHz, CDCl<sub>3</sub>):  $\delta$  = 7.11 (d, *J* = 11.4 Hz, 1H, 3-H), 6.37 (ddq, *J* = 14.9, 11.4, 1.4 Hz, 1H, 4-H), 6.10 (dq, *J* = 14.9, 6.8 Hz, 1H, 5-H), 4.21 (q, *J* = 7.1 Hz, 2H, 7-H), 2.40 (q, *J* = 7.5 Hz, 2H, 9-H), 1.88 (dd, *J* = 6.8, 1.4 Hz, 3H, 6-H), 1.30 (t, *J* = 7.1 Hz, 3H, 10-H), 1.03 (t, *J* = 7.5 Hz, 3H, 8-H) ppm. **<sup>13</sup>C-NMR** (125 MHz, CDCl<sub>3</sub>):  $\delta$  = 168.5 (q, C-1), 138.2 (t, C-3), 138.0 (t, C-5), 131.5 (q, C-2), 127.2 (t, C-4), 60.5 (s, C-7), 20.4 (s, C-9), 19.1 (p, C-6), 14.5 (p, C-10), 14.4 (p, C-8) ppm. **HRMS** [ESI<sup>+</sup>]: *m/z* for C<sub>10</sub>H<sub>17</sub>O<sub>2</sub> [M+H]<sup>+</sup>: calculated = 169.1223, found = 169.1219.

#### (2*E*,4*E*)-2-ethylhexa-2,4-dienal (**20**)

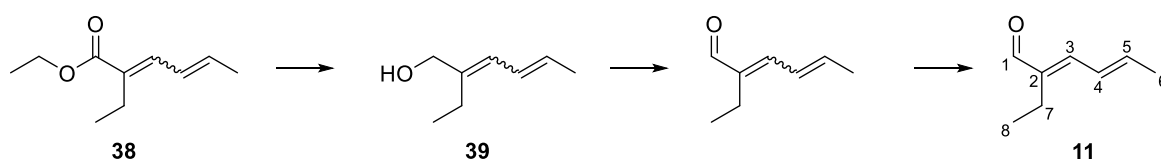

A stirred solution of ethyl ester **38** (1.00 g, 5.94 mmol, 1.0 equiv.) in CH<sub>2</sub>Cl<sub>2</sub> (30.0 mL, 0.2 M) was cooled to -78 °C. After dropwise addition of DIBAL-H (17.8 mL, 17.8 mmol, 3.0 equiv., 1 M in hexane), the mixture was stirred for 30 minutes at -78 °C. Quenching with saturated aqueous NaK-tartrate solution was followed by stirring at room temperature for 2 h. The resulting phases were separated and the aqueous one was extracted three times with CH<sub>2</sub>Cl<sub>2</sub>. Subsequently, the combined organic phases were washed with brine, dried over MgSO<sub>4</sub> and filtrated. Removal of the solvent *in vacuo* yielded crude allylic alcohol **39** which was used directly in the next step without further purification.

The crude product was dissolved in CH<sub>2</sub>Cl<sub>2</sub> (40.0 mL, 0.15 M) and DMP (2.77 g, 6.54 mmol, 1.1 equiv.) was added at room temperature. After stirring for 40 minutes, saturated aqueous NaHCO<sub>3</sub> solution and Et<sub>2</sub>O were added and stirring was continued for another 40 minutes. The resulting phases were separated and the aqueous one was extracted three times with Et<sub>2</sub>O. Combined organic phases were washed four times with saturated aqueous Na<sub>2</sub>S<sub>2</sub>O<sub>3</sub> solution, once with brine, dried over MgSO<sub>4</sub> and filtrated. The solvent mixture was removed *in vacuo* and the crude aldehyde **20** was taken up again in Et<sub>2</sub>O (40.0 mL, 0.15 M). After adding I<sub>2</sub> (4.52 g, 17.8 mmol, 3.0 equiv.), the solution was heated to reflux overnight. Washing with

saturated aqueous Na<sub>2</sub>S<sub>2</sub>O<sub>3</sub> solution and brine was followed by removing the solvent *in vacuo*. Purification *via* flash chromatography (SiO<sub>2</sub>, pentane:Et<sub>2</sub>O / 49:1) yielded *all-trans*-aldehyde **11** (575 mg, 4.63 mmol, 78% over three steps) as a colourless, slightly volatile liquid.

**R<sub>f</sub>** : (pentane:Et<sub>2</sub>O / 49:1) = 0.28. **<sup>1</sup>H-NMR** (500 MHz, CDCl<sub>3</sub>): δ = 9.38 (s, 1H, 1-H), 6.75 (d, *J* = 11.2 Hz, 1H, 3-H), 6.55 (ddq, *J* = 14.9, 11.2, 1.6 Hz, 1H, 4-H), 6.26 (dq, *J* = 14.9, 6.8 Hz, 1H, 5-H), 2.35 (q, *J* = 7.5 Hz, 2H, 7-H), 1.94 (dd, *J* = 6.8, 1.6 Hz, 3H, 6-H), 1.00 (t, *J* = 7.5 Hz, 3H, 8-H) ppm. **<sup>13</sup>C-NMR** (125 MHz, CDCl<sub>3</sub>): δ = 195.0 (t, C-1), 149.1 (t, C-3), 142.1 (q, C-2), 140.8 (t, C-5), 127.2 (t, C-4), 19.3 (p, C-6), 17.6 (s, C-7), 13.8 (p, C-8) ppm. **HRMS** [ESI<sup>+</sup>]: *m/z* for C<sub>8</sub>H<sub>13</sub>O [M+H]<sup>+</sup>: calculated = 125.0960, found = 125.0957.

***tert*-butyl(((5*E*,7*E*)-5-ethylnona-1,5,7-trien-4-yl)oxy)dimethylsilane (**17a**)**

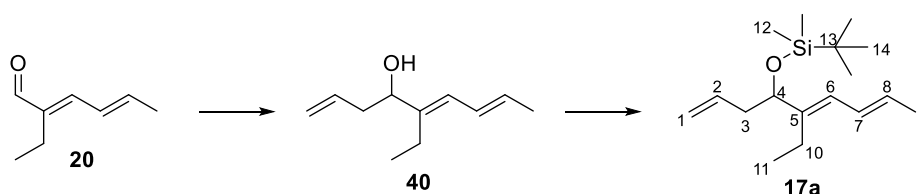

To a stirred suspension of magnesium chips (264 mg, 10.9 mmol, 3.0 equiv.) in THF (15.0 mL) at 0 °C was added allyl bromide (625 μL, 7.24 mmol, 2.0 equiv.). Once the addition was complete, the cooling bath was removed and the mixture was heated to reflux for 1 h. After cooling to room temperature, the supernatant was dripped to a ice-cooled solution of aldehyde **20** (450 mg, 3.62 mmol, 1.0 equiv.) in THF (20.0 mL, 0.1 M) and stirred at 0 °C for 3 h. Quenching with saturated aqueous NH<sub>4</sub>Cl solution was followed by warming up to room temperature. The resulting phases were separated and the aqueous one was extracted three times with Et<sub>2</sub>O. Subsequently, the combined organic phases were washed with brine, dried over MgSO<sub>4</sub> and filtrated. Removal of the solvent *in vacuo* yielded crude allylic alcohol **40** which was used directly in the next step without further purification.

The TBS-protection was carried out as described in general procedure 2. A solution of crude secondary alcohol **40** in DMF (3.60 mL, 1 M), TBSCl (818 mg, 5.43 mmol, 1.5 equiv.) and Imidazole (616 mg, 9.05 mmol, 2.5 equiv.) were used. Purification by filtration over a short plug of silica (SiO<sub>2</sub>, pentane) yielded product **17a** (551 mg, 1.96 mmol, 54% over two steps) as a colourless liquid.

**R<sub>f</sub>** : (pentane) = 0.49. **<sup>1</sup>H-NMR** (500 MHz, CDCl<sub>3</sub>):  $\delta$  = 6.25 (ddq,  $J$  = 15.0, 11.1, 1.5 Hz, 1H, 7-H), 5.92 (d,  $J$  = 11.1 Hz, 1H, 6-H), 5.77 (ddt,  $J$  = 17.1, 10.1, 7.1 Hz, 1H, 2-H), 5.66 (dq,  $J$  = 15.0, 6.7 Hz, 1H, 8-H), 5.04-4.98 (m, 2H, 1-H), 4.04 (t,  $J$  = 6.3 Hz, 1H, 4-H), 2.27-2.22 (m, 2H, 3-H), 2.20 (dq,  $J$  = 14.0, 7.6 Hz, 1H, 1  $\times$  10-H), 2.08 (dq,  $J$  = 14.0, 7.6 Hz, 1H, 1  $\times$  10-H), 1.79 (dd,  $J$  = 6.7, 1.5 Hz, 3H, 9-H), 1.05 (t,  $J$  = 7.6 Hz, 3H, 11-H), 0.88 (s, 9H, 14-H), 0.02 (s, 3H, 12-H), -0.02 (3H, 12-H) ppm. **<sup>13</sup>C-NMR** (125 MHz, CDCl<sub>3</sub>):  $\delta$  = 143.2 (q, C-5), 136.0 (t, C-2), 128.9 (t, C-8), 127.5 (t, C-7), 124.9 (t, C-6), 116.4 (s, C-1), 77.0 (t, C-4), 42.1 (s, C-3), 26.0 (p, 3  $\times$  C-14), 20.6 (s, C-10), 18.6 (p, C-9), 18.4 (q, C-13), 14.9 (p, C-11), -4.4 (p, 1  $\times$  C-12), -4.8 (p, 1  $\times$  C-12) ppm. **EA**: calculated for C<sub>17</sub>H<sub>32</sub>OSi: C = 72.79, H = 11.50; found: C = 73.12, H = 11.09.

***S*-(2-acetamidoethyl) (2*E*,8*E*,10*E*)-7-((*tert*-butyldimethylsilyl)oxy)-8-ethyl-2-methyldodeca-2,8,10-trienethioate (**18a**)**

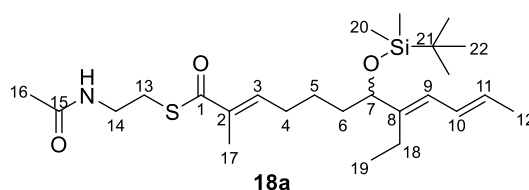

The reaction was carried out as described in general procedure 3, except small changes in the used ratios. A solution of alkene **17a** (60.6 mg, 210  $\mu$ mol, 1.5 equiv.) in THF (210  $\mu$ L, 1 M), 9-BBN (420  $\mu$ L, 210  $\mu$ mol, 1.5 equiv., 0.5 M in THF), DMF (840  $\mu$ L, total 0.2 M), vinyl bromide **13a** (38.3 mg, 140  $\mu$ mol, 1.0 equiv.), PdCl<sub>2</sub>(dppf) (5.1 mg, 7.00  $\mu$ mol, 5 mol%) and K<sub>2</sub>CO<sub>3</sub> (38.7 mg, 280  $\mu$ mol, 2.0 equiv.) were used. Purification by flash chromatography (SiO<sub>2</sub>, cyclohexane:EtOAc / 1:1) yielded product **18a** (17.7 mg, 37.8  $\mu$ mol, 27%) as a brown oil.

**R<sub>f</sub>** : (cyclohexane:EtOAc / 1:1) = 0.41; **<sup>1</sup>H-NMR** (500 MHz, CDCl<sub>3</sub>):  $\delta$  = 6.75 (tq,  $J$  = 7.3, 1.3 Hz, 1H, 3-H), 6.28-6.22 (m, 1H, 10-H), 5.92-5.82 (m, 2H, 9-H, NH), 5.66 (dq,  $J$  = 14.7, 6.9 Hz, 1H, 11-H), 4.02 (t,  $J$  = 5.6 Hz, 1H, 7-H), 3.47-3.43 (m, 2H, 14-H), 3.07 (t,  $J$  = 6.3 Hz, 2H, 13-H), 2.22-2.16 (m, 3H, 4-H, 1  $\times$  18-H), 2.07-2.03 (m, 1H, 1  $\times$  18-H), 1.97 (s, 3H, 16-H), 1.86 (d,  $J$  = 1.3 Hz, 3H, 17-H), 1.79 (dd,  $J$  = 6.9, 1.4 Hz, 3H, 12-H), 1.52-1.48 (m, 3H, 6-H, 1  $\times$  5-H), 1.40-1.37 (m, 1H, 1  $\times$  5-H), 1.04 (t,  $J$  = 7.6 Hz, 3H, 19-H), 0.89 (s, 9H, 22-H), 0.03 (s, 3H, 20-H), -0.02 (s, 3H, 20-H) ppm. **<sup>13</sup>C-NMR** (125 MHz, CDCl<sub>3</sub>):  $\delta$  = 194.2 (q, C-1), 170.4 (q, C-15), 143.2 (q, C-8), 142.3 (t, C-3), 136.0 (q, C-2), 129.0 (t, C-11), 127.5 (t, C-10), 125.0 (t, C-9), 76.8 (t, C-7), 40.0 (s, C-14), 36.8 (s, C-6), 29.0 (s, C-4), 28.6 (s, C-13), 26.0 (p, 3  $\times$  C-

22), 24.7 (s, C-5), 23.4 (p, C-16), 20.6 (s, C-18), 18.6 (p, C-12), 18.4 (q, C-21), 15.0 (p, C-19), 12.6 (p, C-17), -4.4 (p, C-20), -4.9 (p, C-20) ppm. **HRMS** [ESI<sup>+</sup>]: *m/z* for C<sub>25</sub>H<sub>45</sub>NNaO<sub>3</sub>SSi [M+Na]<sup>+</sup>: calculated = 490.2781, found = 490.2775.

**triethyl(((5*E*,7*E*)-5-ethynona-1,5,7-trien-4-yl)oxy)silane (**17b**)**

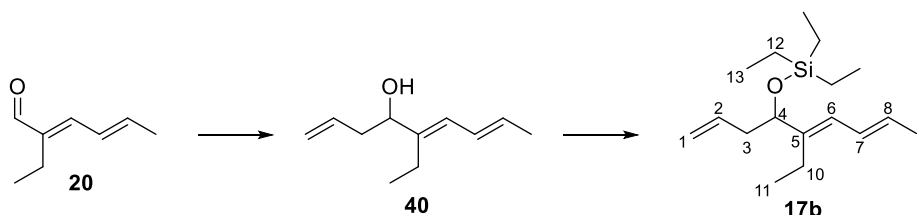

To a stirred suspension of magnesium chips (117 mg, 4.83 mmol, 3.0 equiv.) in THF (6.50 mL) at 0 °C was added allyl bromide (278  $\mu$ L, 3.22 mmol, 2.0 equiv.). Once the addition was complete, the cooling bath was removed and the mixture was heated to reflux for 1 h. After cooling to room temperature, the supernatant was dripped to a ice-cooled solution of aldehyde **20** (200 mg, 1.61 mmol, 1.0 equiv.) in THF (10.0 mL, 0.1 M) and stirred at 0 °C for 3 h. Quenching with saturated aqueous NH<sub>4</sub>Cl solution was followed by warming up to room temperature. The resulting phases were separated and the aqueous one was extracted three times with Et<sub>2</sub>O. Subsequently, the combined organic phases were washed with brine, dried over MgSO<sub>4</sub> and filtrated. Removal of the solvent *in vacuo* yielded crude allylic alcohol **40** which was used directly in the next step without further purification.

The TES-protection was carried out as described in general procedure 2. A solution of crude secondary alcohol **40** in DMF (1.60 mL, 1 M), TESCl (406  $\mu$ L, 2.42 mmol, 1.5 equiv.) and Imidazole (274 mg, 4.02 mmol, 2.5 equiv.) were used. Purification by filtration over a short plug of silica (SiO<sub>2</sub>, pentane) yielded product **17b** (260 mg, 927  $\mu$ mol, 58% over two steps) as a colourless liquid.

**R<sub>f</sub>** : (pentane) = 0.33. **<sup>1</sup>H-NMR** (500 MHz, CDCl<sub>3</sub>):  $\delta$  = 6.28-6.22 (m, 1H, 7-H), 5.92 (d, *J* = 11.0 Hz, 1H, 6-H), 5.76 (ddt, *J* = 17.2, 10.1, 7.1 Hz, 1H, 2-H), 5.66 (dq, *J* = 13.5, 6.7 Hz, 1H, 8-H), 5.04-4.98 (m, 2H, 1-H), 4.05 (t, *J* = 6.3 Hz, 1H, 4-H), 2.29-2.25 (m, 2H, 3-H), 2.20 (dq, *J* = 14.6, 7.6 Hz, 1H, 1  $\times$  10-H), 2.10 (dq, *J* = 14.6, 7.6 Hz, 1H, 1  $\times$  10-H), 1.78 (dd, *J* = 6.7, 1.5 Hz, 3H, 9-H), 1.05 (t, *J* = 7.6 Hz, 3H, 11-H), 0.93 (t, *J* = 7.9 Hz, 9H, 13-H), 0.57 (q, *J* = 7.9 Hz, 6H, 12-H) ppm. **<sup>13</sup>C-NMR** (125 MHz, CDCl<sub>3</sub>):  $\delta$  = 143.2 (q, C-5), 135.9 (t, C-2), 128.9 (t, C-8), 127.5 (t, C-7), 124.9 (t, C-6), 116.4 (s, C-1), 76.9 (t, C-4), 42.1 (s, C-3), 20.6

(s, C-10), 18.6 (p, C-9), 14.9 (p, C-11), 7.1 (p, 3 × C-13), 5.0 (s, 3 × C-12) ppm. **EA**: calculated for C<sub>17</sub>H<sub>32</sub>OSi: C = 72.79, H = 11.50; found: C = 72.52, H = 11.63.

***S*-(2-acetamidoethyl) (2*E*,8*E*,10*E*)-8-ethyl-2-methyl-7-((triethylsilyl)oxy)dodeca-2,8,10-trienethioate (**18b**)**

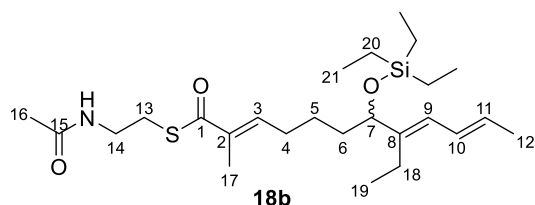

The reaction was carried out as described in general procedure 3. A solution of alkene **17b** (40.0 mg, 143 μmol, 1.5 equiv.) in THF (95.0 μL, 1 M), 9-BBN (286 μL, 143 μmol, 1.5 equiv., 0.5 M in THF), DMF (500 μL, total 0.2 M), vinyl iodide **13b** (29.8 mg, 95.0 μmol, 1.0 equiv.), PdCl<sub>2</sub>(dppf) (3.5 mg, 4.75 μmol, 5 mol%), AsPh<sub>3</sub> (1.5 mg, 4.75 μmol, 5 mol%) and Cs<sub>2</sub>CO<sub>3</sub> (61.9 mg, 190 μmol, 2.0 equiv.) were used. Purification by flash chromatography (SiO<sub>2</sub>, cyclohexane:EtOAc / 1:1) yielded product **18b** (38.6 mg, 82.7 μmol, 87%) as a yellowish oil.

**R<sub>f</sub>** : (cyclohexane:EtOAc / 1:1) = 0.29; **<sup>1</sup>H-NMR** (500 MHz, CDCl<sub>3</sub>): δ = 6.75 (tq, *J* = 7.2, 1.3 Hz, 1H, 3-H), 6.28-6.22 (m, 1H, 10-H), 5.91 (d, *J* = 11.1 Hz, 1H, 9-H), 5.87 (br, 1 H, NH), 5.66 (dq, *J* = 13.5, 6.6 Hz, 1H, 11-H), 4.03 (t, *J* = 5.8 Hz, 1H, 7-H), 3.47-3.43 (m, 2H, 14-H), 3.06 (t, *J* = 6.3 Hz, 2H, 13-H), 2.22-2.16 (m, 3H, 4-H, 1 × 18-H), 2.11-2.04 (m, 1H, 1 × 18-H), 1.96 (s, 3H, 16-H), 1.86 (d, *J* = 1.3 Hz, 3H, 17-H), 1.79 (dd, *J* = 6.6, 1.4 Hz, 3H, 12-H), 1.55-1.49 (m, 3H, 6-H, 1 × 5-H), 1.45-1.37 (m, 1H, 1 × 5-H), 1.04 (t, *J* = 7.6 Hz, 3H, 19-H), 0.93 (t, *J* = 7.9 Hz, 9H, 21-H), 0.57 (q, 6H, 20-H) ppm. **<sup>13</sup>C-NMR** (125 MHz, CDCl<sub>3</sub>): δ = 194.2 (q, C-1), 170.4 (q, C-15), 143.2 (q, C-8), 142.2 (t, C-3), 136.0 (q, C-2), 129.0 (t, C-11), 127.5 (t, C-10), 125.0 (t, C-9), 76.8 (t, C-7), 40.0 (s, C-14), 36.8 (s, C-6), 29.0 (s, C-4), 28.5 (s, C-13), 24.7 (s, C-5), 23.4 (p, C-16), 20.5 (s, C-18), 18.6 (p, C-12), 15.0 (p, C-19), 12.6 (p, C-17), 7.1 (p, C-21), 5.0 (s, C-20) ppm. **HRMS** [ESI<sup>+</sup>]: *m/z* for C<sub>25</sub>H<sub>45</sub>NNaO<sub>3</sub>SSi [M+Na]<sup>+</sup>: calculated = 490.2781, found = 490.2774.

***S*-(2-acetamidoethyl) (2*E*,8*E*,10*E*)-8-ethyl-7-hydroxy-2-methyldodeca-2,8,10-trienethioate (**19**)**

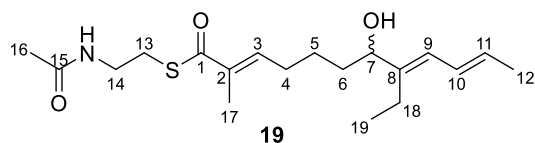

The reaction was carried out as described in general procedure 4. A solution of silylether **18b** (15.0 mg, 32.1  $\mu$ mol, 1.0 equiv.) in THF (80  $\mu$ L), HF\*pyridine (10  $\mu$ L, ~70% HF) and pyridine (20  $\mu$ L) were used and the reaction ran overnight. Purification by semi-preparative HPLC yielded product **19** (9.1 mg, 26.0  $\mu$ mol, 81%) as a colourless oil.

**R<sub>f</sub>**: (cyclohexane:EtOAc / 1:1) = 0.27; **<sup>1</sup>H-NMR** (500 MHz, CDCl<sub>3</sub>):  $\delta$  = 6.75 (tq,  $J$  = 7.3, 1.3 Hz, 1H, 3-H), 6.29-6.24 (m, 1H, 10-H), 5.97 (d,  $J$  = 11.0 Hz, 1H, 9-H), 5.87 (br, 1 H, NH), 5.72 (dq,  $J$  = 13.7, 6.8 Hz, 1H, 11-H), 4.08 (t,  $J$  = 5.8 Hz, 1H, 7-H), 3.47-3.43 (m, 2H, 14-H), 3.06 (t,  $J$  = 6.3 Hz, 2H, 13-H), 2.26-2.19 (m, 3H, 4-H, 1  $\times$  18-H), 2.16-2.09 (m, 1H, 1  $\times$  18-H), 1.96 (s, 3H, 16-H), 1.87 (d,  $J$  = 1.3 Hz, 3H, 17-H), 1.80 (dd,  $J$  = 6.8, 1.5 Hz, 3H, 12-H), 1.60-1.55 (m, 3H, 6-H, 1  $\times$  5-H), 1.47-1.45 (m, 1H, 1  $\times$  5-H), 1.06 (t,  $J$  = 7.6 Hz, 3H, 19-H) ppm. **<sup>13</sup>C-NMR** (125 MHz, CDCl<sub>3</sub>):  $\delta$  = 194.2 (q, C-1), 170.4 (q, C-15), 143.3 (q, C-8), 141.9 (t, C-3), 136.1 (q, C-2), 130.2 (t, C-11), 127.1 (t, C-10), 125.4 (t, C-9), 76.5 (t, C-7), 40.0 (s, C-14), 35.3 (s, C-6), 28.8 (s, C-4), 28.6 (s, C-13), 25.0 (s, C-5), 23.4 (p, C-16), 20.8 (s, C-18), 18.6 (p, C-12), 15.1 (p, C-19), 12.6 (p, C-17) ppm. **HRMS** [ESI<sup>+</sup>]:  $m/z$  for C<sub>19</sub>H<sub>31</sub>NNaO<sub>3</sub>S [M+Na]<sup>+</sup>: calculated = 376.1916, found = 376.1912.

**(3*S*,4*R*,5*E*,7*E*)-5-ethyl-3-methylnona-1,5,7-trien-4-ol (**21**)**

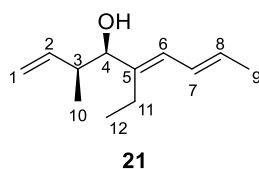

A stirred solution of KO<sup>t</sup>Bu (651 mg, 5.80 mmol, 1.8 equiv.) in THF (5.80 mL, 1 M) was cooled to -78 °C and precooled *cis*-butene (1.20 mL, 12.9 mmol, 4.0 equiv.) was added. Subsequently, *n*-BuLi (2.32 mL, 5.80 mmol, 1.8 equiv., 2.5 M in hexane) was added dropwise. The resulting yellow solution was warmed to -50 °C and stirred for 30 minutes. After re-cooling to -78 °C, a solution of (+)-Ipc<sub>2</sub>BOMe (2.14 g, 6.76 mmol, 2.1 equiv.) in Et<sub>2</sub>O (6.80 mL, 1 M) was added slowly, which resulted in loss of yellow colour. Stirring for 30 minutes was followed

by addition of  $\text{BF}_3 \times \text{Et}_2\text{O}$  (1.02 mL, 8.05 mmol, 2.5 equiv.), ten minutes of stirring and addition of a solution of aldehyde **20** (400 mg, 3.22 mmol, 1.0 equiv.) in  $\text{Et}_2\text{O}$  (4.60 mL, 0.7 M). After stirring for 6 h at  $-78^\circ\text{C}$ , a premixed solution of NaOH (10.0 mL, 3 M) and  $\text{H}_2\text{O}_2$  (10.0 mL, 30%) was added and the solution was stirred overnight at room temperature. The resulting phases were separated and the aqueous one was extracted three times with  $\text{Et}_2\text{O}$ . Combined organic phases were washed with brine, dried over  $\text{MgSO}_4$  and filtrated. Removal of the solvent *in vacuo* and purification *via* flash chromatography ( $\text{SiO}_2$ , pentane: $\text{Et}_2\text{O}$  / 29:1) yielded secondary alcohol **21** (418 mg, 2.31 mmol, 71%, 86% *e.e.*) as yellowish oil.

**R<sub>f</sub>** : (*n*-Pentan: $\text{Et}_2\text{O}$  / 29:1) = 0.32. **<sup>1</sup>H-NMR** (500 MHz,  $\text{CDCl}_3$ ):  $\delta$  = 6.31-6.25 (m, 1H, 7-H), 6.00 (d,  $J$  = 11.0 Hz, 1H, 6-H), 5.82 (ddd,  $J$  = 17.3, 10.5, 6.8 Hz, 1H, 2-H), 5.70 (dq,  $J$  = 14.9, 6.7 Hz, 1H, 8-H), 5.09-5.04 (m, 2H, 1-H), 3.99 (d,  $J$  = 5.5 Hz, 1H, 4-H), 2.47-2.41 (m, 1H, 3-H), 2.23 (dq,  $J$  = 15.0, 7.6 Hz, 1H, 1  $\times$  11-H), 2.06 (dq,  $J$  = 15.0, 7.6 Hz, 1H, 1  $\times$  11-H), 1.79 (dd,  $J$  = 6.7, 1.4 Hz, 3H, 9-H), 1.07 (t,  $J$  = 7.6 Hz, 3H, 12- $\text{H}_3$ ), 1.00 (d,  $J$  = 6.8 Hz, 3H, 10-H) ppm. **<sup>13</sup>C-NMR** (125 MHz,  $\text{CDCl}_3$ ):  $\delta$  = 141.8 (q, C-5), 141.6 (t, C-2), 129.7 (t, C-8), 127.2 (t, C-7), 125.5 (t, C-6), 114.8 (s, C-1), 78.7 (t, C-4), 41.4 (t, C-3), 21.7 (s, C-11), 18.6 (p, C-9), 14.7 (p, C-12), 13.7 (p, C-10) ppm. **EA**: calculated for  $\text{C}_{12}\text{H}_{20}\text{O}$ : C = 79.94, H = 11.18; found: C = 79.38, H = 11.32.  **$[\alpha]_{22}^D$** : + 4.8  $^\circ$  ( $c$  = 1.0 in  $\text{CH}_2\text{Cl}_2$ ).

***tert*-butyl(((3*S*,4*R*,5*E*,7*E*)-5-ethyl-3-methylnona-1,5,7-trien-4-yl)oxy)dimethylsilane (**22a**)**

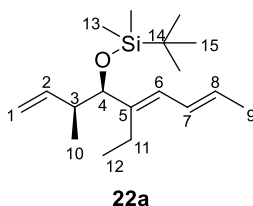

The TBS-protection was carried out as described in general procedure 2. A solution of secondary alcohol **21** (150 mg, 832  $\mu\text{mol}$ , 1.0 equiv.) in DMF (830  $\mu\text{L}$ , 1 M), TBSCl (187 mg, 1.24 mmol, 1.5 equiv.) and Imidazole (142 mg, 2.08 mmol, 2.5 equiv.) were used. Purification by filtration over a short plug of silica ( $\text{SiO}_2$ , pentane) yielded product **22a** (222 mg, 754  $\mu\text{mol}$ , 91%) as a colourless liquid.

**R<sub>f</sub>** : (pentane) = 0.79. **<sup>1</sup>H-NMR** (500 MHz,  $\text{CDCl}_3$ ):  $\delta$  = 6.28-6.23 (m, 1H, 7-H), 5.90 (d,  $J$  = 11.1 Hz, 1H, 6-H), 5.77 (ddd,  $J$  = 17.4, 10.3, 7.3 Hz, 1H, 2-H), 5.64 (dq,  $J$  = 13.6, 6.7 Hz, 1H, 8-H), 4.99-4.92 (m, 2H, 1-H), 3.85 (d,  $J$  = 5.5 Hz, 1H, 4-H), 2.32-2.28 (m, 1H, 3-H), 2.20 (dq,  $J$  = 15.2, 7.6 Hz, 1H, 1  $\times$  11-H), 2.01 (dq,  $J$  = 15.1, 7.6 Hz, 1H, 1  $\times$  11-H), 1.78 (dd,

$J = 6.7, 1.4$  Hz, 3H, 9-H), 1.04 (t,  $J = 7.6$  Hz, 3H, 12-H), 0.94 (d,  $J = 6.7$  Hz, 3H, 10-H), 0.90 (s, 9H, 15-H), 0.01 (s, 3H, 13-H), -0.05 (s, 3H, 13-H) ppm.  $^{13}\text{C-NMR}$  (125 MHz,  $\text{CDCl}_3$ ):  $\delta = 142.7$  (t, C-2), 141.9 (q, C-5), 128.6 (t, C-8), 127.5 (t, C-7), 126.0 (t, C-6), 113.6 (s, C-1), 80.3 (t, C-4), 42.4 (t, C-3), 26.1 (p, C-15), 21.3 (s, C-11), 18.6 (p, C-9), 18.4 (q, C-14), 14.6 (p, C-12), 14.4 (p, C-10), -4.2 (p, C-13), -4.9 (p, C-13) ppm. **EA**: calculated for  $\text{C}_{18}\text{H}_{34}\text{OSi}$ : C = 73.40, H = 11.64; found.: C = 73.51, H = 11.70.  $[\alpha]_{22}^{\text{D}}$ : + 12.4 ° (c = 1.0 in  $\text{CH}_2\text{Cl}_2$ ).

**triethyl(((3*S*,4*R*,5*E*,7*E*)-5-ethyl-3-methylnona-1,5,7-trien-4-yl)oxy)silane (**22b**)**

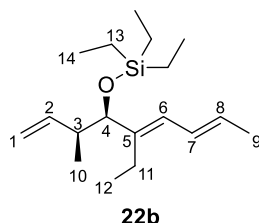

The TES-protection was carried out as described in general procedure 2. A solution of secondary alcohol **21** (80.0 mg, 443  $\mu\text{mol}$ , 1.0 equiv.) in DMF (440  $\mu\text{L}$ , 1 M), TESCl (112  $\mu\text{L}$ , 666  $\mu\text{mol}$ , 1.5 equiv.) and Imidazole (75.5 mg, 1.11 mmol, 2.5 equiv.) were used. Purification by filtration over a short plug of silica ( $\text{SiO}_2$ , pentane) yielded product **22b** (110 mg, 373  $\mu\text{mol}$ , 84%) as a colourless liquid.

**R<sub>f</sub>** : (pentane) = 0.53.  $^1\text{H-NMR}$  (500 MHz,  $\text{CDCl}_3$ ):  $\delta = 6.28$ -6.23 (m, 1H, 7-H), 5.90 (d,  $J = 11.1$  Hz, 1H, 6-H), 5.77 (ddd,  $J = 17.5, 10.4, 7.3$  Hz, 1H, 2-H), 5.65 (dq,  $J = 13.7, 6.8$  Hz, 1H, 8-H), 4.99-4.93 (m, 2H, 1-H), 3.88 (d,  $J = 5.5$  Hz, 1H, 4-H), 2.32-2.28 (m, 1H, 3-H), 2.19 (dq,  $J = 15.0, 7.6$  Hz, 1H, 1  $\times$  11-H), 2.04 (dq,  $J = 15.0, 7.6$  Hz, 1H, 1  $\times$  11-H), 1.79 (dd,  $J = 6.8, 1.5$  Hz, 3H, 9-H), 1.04 (t,  $J = 7.6$  Hz, 3H, 12-H), 0.95-0.92 (m, 12H, 10-H, 14-H), 0.56 (q,  $J = 7.9$  Hz, 6H, 13-H) ppm.  $^{13}\text{C-NMR}$  (125 MHz,  $\text{CDCl}_3$ ):  $\delta = 142.6$  (t, C-2), 142.1 (q, C-5), 128.7 (t, C-8), 127.6 (t, C-7), 125.9 (t, C-6), 113.6 (s, C-1), 80.6 (t, C-4), 42.4 (t, C-3), 21.2 (s, C-11), 18.6 (p, C-9), 14.62 (p, C-12), 14.57 (p, C-10), 7.1 (p, C-14), 5.0 (p, C-13) ppm. **EA**: calculated for  $\text{C}_{18}\text{H}_{34}\text{OSi}$ : C = 73.40, H = 11.64; found: C = 73.56, H = 11.55.  $[\alpha]_{22}^{\text{D}}$ : + 12.5 ° (c = 1.0 in  $\text{CH}_2\text{Cl}_2$ ).

***S*-(2-acetamidoethyl) (2*E*,6*S*,7*R*,8*E*,10*E*)-7-((*tert*-butyldimethylsilyl)oxy)-8-ethyl-2,6-dimethyldodeca-2,8,10-trienethioate (**28a**)**

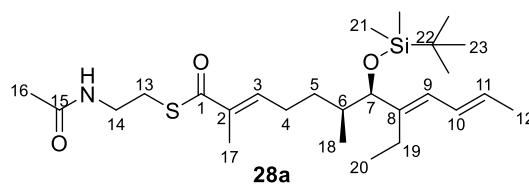

The reaction was carried out as described in general procedure 3 with changes to the equivalents used. A solution of alkene **22a** (42.5 mg, 144  $\mu$ mol, 1.0 equiv.) in THF (145  $\mu$ L, 1 M), 9-BBN (288  $\mu$ L, 144  $\mu$ mol, 1.0 equiv., 0.5 M in THF), DMF (720  $\mu$ L, total 0.2 M), vinyl bromide **13a** (57.5 mg, 216  $\mu$ mol, 1.5 equiv.), PdCl<sub>2</sub>(dppf) (5.3 mg, 7.20  $\mu$ mol, 5 mol%) and K<sub>2</sub>CO<sub>3</sub> (39.8 mg, 288  $\mu$ mol, 2.0 equiv.) were used. Purification by flash chromatography (SiO<sub>2</sub>, cyclohexane:EtOAc / 1:1) yielded product **28a** (20.8 mg, 43.2  $\mu$ mol, 30%) as a yellowish oil.

**R<sub>f</sub>** : (cyclohexane:EtOAc / 1:1) = 0.31; **<sup>1</sup>H-NMR** (500 MHz, CDCl<sub>3</sub>):  $\delta$  = 6.73 (t, *J* = 7.3 Hz, 1H, 3-H), 6.28-6.22 (m, 1H, 10-H), 5.91 (br, 1H, NH), 5.88 (d, *J* = 11.1 Hz, 1H, 9-H), 5.64 (dq, *J* = 13.6, 6.7 Hz, 1H, 11-H), 3.78 (d, *J* = 5.4 Hz, 1H, 7-H), 3.46-3.42 (m, 2H, 14-H), 3.06 (t, *J* = 6.4 Hz, 2H, 13-H), 2.29-2.23 (m, 1H, 1  $\times$  4-H), 2.20-2.14 (m, 2H, 1  $\times$  4-H, 1  $\times$  19-H), 2.00-1.96 (m, 4H, 16-H, 1  $\times$  19-H), 1.86 (s, 3H, 17-H), 1.79 (dd, *J* = 6.7, 1.2 Hz, 3H, 12-H), 1.57-1.55 (m, 1H, 6-H), 1.51-1.48 (m, 1H, 1  $\times$  5-H), 1.23-1.20 (m, 1H, 1  $\times$  5-H), 1.03 (t, *J* = 7.6 Hz, 3H, 20-H), 0.90 (s, 9H, 23-H), 0.85 (d, *J* = 6.6 Hz, 3H, 18-H), 0.02 (s, 3H, 21-H), -0.06 (s, 3H, 21-H) ppm. **<sup>13</sup>C-NMR** (125 MHz, CDCl<sub>3</sub>):  $\delta$  = 194.2 (q, C-1), 170.4 (q, C-15), 142.4 (t, C-3), 141.8 (q, C-8), 135.8 (q, C-2), 128.8 (t, C-11), 127.4 (t, C-10), 126.3 (t, C-9), 80.3 (t, C-7), 40.0 (s, C-14), 37.1 (t, C-6), 32.7 (s, C-5), 28.5 (s, C-13), 26.9 (s, C-4), 26.1 (p, 3  $\times$  C-23), 23.4 (p, C-16), 21.1 (s, C-19), 18.6 (p, C-12), 18.4 (q, C-22), 14.8 (p, C-20), 14.3 (p, C-18), 12.6 (p, C-17), -4.2 (p, C-21), -4.9 (p, C-21) ppm. **HRMS** [ESI<sup>+</sup>]: *m/z* for C<sub>26</sub>H<sub>47</sub>NNaO<sub>3</sub>SSi [M+Na]<sup>+</sup>: calculated = 504.2938, found = 504.2928. [ $\alpha$ ]<sub>22</sub><sup>D</sup>: + 3.5 ° (c = 1.0 in CH<sub>2</sub>Cl<sub>2</sub>).

***S*-(2-acetamidoethyl) (2*E*,6*S*,7*R*,8*E*,10*E*)-8-ethyl-2,6-dimethyl-7-((triethylsilyl)oxy)dodeca-2,8,10-trienethioate (**28b**)**

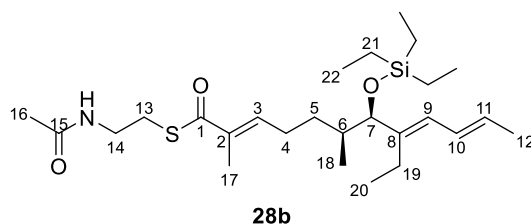

a.)

The reaction was carried out as described in general procedure 3 with changes to the equivalents used. A solution of alkene **22b** (40.0 mg, 136  $\mu$ mol, 1.0 equiv.) in THF (135  $\mu$ L, 1 M), 9-BBN (272  $\mu$ L, 136  $\mu$ mol, 1.0 equiv., 0.5 M in THF), DMF (680  $\mu$ L, total 0.2 M), vinyl bromide **13a** (54.2 mg, 204  $\mu$ mol, 1.5 equiv.), PdCl<sub>2</sub>(dppf) (5.0 mg, 6.28  $\mu$ mol, 5 mol%) and K<sub>2</sub>CO<sub>3</sub> (37.5 mg, 272  $\mu$ mol, 2.0 equiv.) were used. Purification by flash chromatography (SiO<sub>2</sub>, cyclohexane:EtOAc / 1:1) yielded product **28b** (33.4 mg, 69.4  $\mu$ mol, 51%) as a yellowish oil.

b.)

The reaction was carried out as described in general procedure 3. A solution of alkene **22b** (40.0 mg, 136  $\mu$ mol, 1.5 equiv.) in THF (140  $\mu$ L, 1 M), 9-BBN (272  $\mu$ L, 136  $\mu$ mol, 1.5 equiv., 0.5 M in THF), DMF (450  $\mu$ L, total 0.2 M), vinyl iodide **13b** (28.3 mg, 90.5  $\mu$ mol, 1.0 equiv.), PdCl<sub>2</sub>(dppf) (3.3 mg, 4.50  $\mu$ mol, 5 mol%), AsPh<sub>3</sub> (1.4 mg, 4.50  $\mu$ mol, 5 mol%) and Cs<sub>2</sub>CO<sub>3</sub> (58.9 mg, 181  $\mu$ mol, 2.0 equiv.) were used. Purification by flash chromatography (SiO<sub>2</sub>, cyclohexane:EtOAc / 1:1) yielded product **28b** (32.4 mg, 67.2  $\mu$ mol, 74%) as a yellowish oil.

**R<sub>f</sub>** : (cyclohexane:EtOAc / 1:1) = 0.31. **<sup>1</sup>H-NMR** (500 MHz, CDCl<sub>3</sub>):  $\delta$  = 6.75 (t, *J* = 7.3, 1.3 Hz, 1H, 3-H), 6.29-6.23 (m, 1H, 10-H), 5.88 (d, *J* = 11.1 Hz, 1H, 9-H), 5.86 (br, 1 H, NH), 5.65 (dq, *J* = 13.5, 6.6 Hz, 1H, 11-H), 3.80 (d, *J* = 5.7 Hz, 1H, 7-H), 3.47-3.43 (m, 2H, 14-H), 3.06 (t, *J* = 6.3 Hz, 2H, 13-H), 2.29-2.23 (m, 1H, 1  $\times$  4-H), 2.19-2.13 (m, 2H, 1  $\times$  4-H, 1  $\times$  19-H), 2.08-2.03 (m, 1H, 1  $\times$  19-H), 1.96 (s, 3H, 16-H), 1.87 (s, 3H, 17-H), 1.79 (dd, *J* = 6.6, 1.4 Hz, 3H, 12-H), 1.54-1.46 (m, 2H, 6-H, 1  $\times$  5-H), 1.24-1.17 (m, 1H, 1  $\times$  5-H), 1.03 (t, *J* = 7.6 Hz, 3H, 20-H), 0.93 (t, *J* = 7.9 Hz, 9H, 22-H), 0.87 (d, *J* = 6.6 Hz, 3H, 18-H), 0.57 (q, *J* = 7.9 Hz, 6H, 21-H) ppm. **<sup>13</sup>C-NMR** (125 MHz, CDCl<sub>3</sub>):  $\delta$  = 194.2 (q, C-1), 170.4 (q, C-15), 142.4 (t, C-3), 142.0 (q, C-8), 135.8 (q, C-2), 128.9 (t, C-11), 127.4 (t, C-10), 126.2

(t, C-9), 80.7 (t, C-7), 40.0 (s, C-14), 37.2 (t, C-6), 32.6 (s, C-5), 28.5 (s, C-13), 26.9 (s, C-4), 23.4 (p, C-16), 20.9 (s, C-19), 18.6 (p, C-12), 14.8 (p, C-20), 14.5 (p, C-18), 12.6 (p, C-17), 7.1 (p, 3 × C-22), 5.1 (s, 3 × C-21) ppm. **HRMS** [ESI<sup>+</sup>]: *m/z* for C<sub>26</sub>H<sub>47</sub>NNaO<sub>3</sub>SSi [M+Na]<sup>+</sup>: calculated = 504.2938, found = 504.2929. [ $\alpha$ ]<sub>22</sub><sup>D</sup>: + 5.4 ° (c = 1.0 in CH<sub>2</sub>Cl<sub>2</sub>).

***S*-(2-acetamidoethyl) (2*E*,6*S*,7*R*,8*E*,10*E*)-8-ethyl-7-hydroxy-2,6-dimethyldodeca-2,8,10-trienethioate (**12**)**

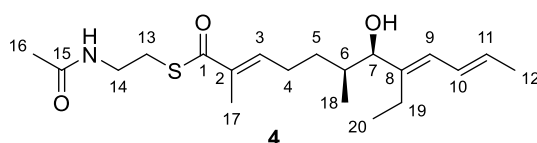

The reaction was carried out as described in general procedure 4. A solution of silylether **28b** (10.0 mg, 20.8 μmol, 1.0 equiv.) in THF (80 μL), HF\*pyridine (10 μL, ~70% HF) and pyridine (20 μL) were used and the reaction ran overnight. Purification by semi-preparative HPLC yielded product **12** (6.2 mg, 16.8 μmol, 81%) as a colourless oil.

**R<sub>f</sub>** : (cyclohexane:EtOAc / 1:1) = 0.19. **<sup>1</sup>H-NMR** (500 MHz, CDCl<sub>3</sub>): δ = 6.75 (tq, *J* = 7.3, 1.3 Hz, 1H, 3-H), 6.31-6.26 (m, 1H, 10-H), 5.97 (d, *J* = 11.0 Hz, 1H, 9-H), 5.87 (br, 1 H, NH), 5.71 (dq, *J* = 13.6, 6.7 Hz, 1H, 11-H), 3.90 (d, *J* = 5.8 Hz, 1H, 7-H), 3.46-3.43 (m, 2H, 14-H), 3.06 (t, *J* = 6.4 Hz, 2H, 13-H), 2.31-2.25 (m, 1H, 1 × 4-H), 2.22-2.15 (m, 2H, 1 × 4-H, 1 × 19-H), 2.09-2.04 (m, 1H, 1 × 19-H), 1.96 (s, 3H, 16-H), 1.87 (s, 3H, 17-H), 1.80 (dd, *J* = 6.7, 1.3 Hz, 3H, 12-H), 1.70-1.66 (m, 1H, 6-H), 1.58-1.51 (m, 1H, 1 × 5-H), 1.34-1.27 (m, 1H, 1 × 5-H), 1.06 (t, *J* = 7.6 Hz, 3H, 20-H), 0.93 (d, *J* = 6.7 Hz, 3H, 18-H) ppm. **<sup>13</sup>C-NMR** (125 MHz, CDCl<sub>3</sub>): δ = 194.1 (q, C-1), 170.4 (q, C-15), 142.4 (q, C-8), 142.2 (t, C-3), 135.9 (q, C-2), 129.9 (t, C-11), 127.1 (t, C-10), 125.7 (t, C-9), 79.6 (t, C-7), 40.0 (s, C-14), 36.2 (t, C-6), 32.6 (s, C-5), 28.5 (s, C-13), 26.7 (s, C-4), 23.4 (p, C-16), 21.4 (s, C-19), 18.6 (p, C-12), 14.9 (p, C-20), 14.2 (p, C-18), 12.6 (p, C-17) ppm. **HRMS** [ESI<sup>+</sup>]: *m/z* for C<sub>20</sub>H<sub>33</sub>NNaO<sub>3</sub>S [M+Na]<sup>+</sup>: calculated = 390.2073, found = 390.2064. [ $\alpha$ ]<sub>22</sub><sup>D</sup>: − 11.4 ° (c = 0.7 in CH<sub>2</sub>Cl<sub>2</sub>).

**(S)-3-hydroxy-1-((S)-4-isopropyl-2-thioxothiazolidin-3-yl)decan-1-one (39)**

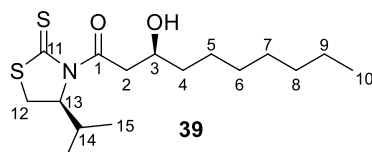

A stirred solution of acetylated (*S*)-Nagao auxiliary (4.88 g, 24.0 mmol, 1.2 equiv.) in CH<sub>2</sub>Cl<sub>2</sub> (240 mL, 0.1 M) was cooled to -78 °C. Dropwise addition of TiCl<sub>4</sub> (26.0 mL, 26.0 mmol, 1.3 equiv., 1 M in CH<sub>2</sub>Cl<sub>2</sub>) was followed by addition of DIPEA (4.53 mL, 26.0 mmol, 1.3 equiv.) and stirring for two hours at -78 °C. Subsequently, a solution of freshly distilled octanal (3.13 mL, 20.0 mmol, 1.0 equiv.) in CH<sub>2</sub>Cl<sub>2</sub> (20 mL, 1 M) was added and stirring was continued for another hour. The reaction was quenched with saturated aqueous NH<sub>4</sub>Cl solution and warmed to room temperature. The resulting phases were separated and the aqueous one was extracted three times with CH<sub>2</sub>Cl<sub>2</sub>. The combined organic phases were washed with brine, dried over MgSO<sub>4</sub> and filtrated. Purification *via* flash chromatography (SiO<sub>2</sub>, cyclohexane:EtOAc / 10:1) yielded secondary alcohol **39** (4.69 g, 14.1 mmol, 71%) as a yellow oil.

**R<sub>f</sub>** : (cyclohexane:EtOAc / 10:1) = 0.10. **<sup>1</sup>H-NMR** (500 MHz, CDCl<sub>3</sub>): δ = 5.16 (ddd, *J* = 7.6, 6.3, 0.9 Hz, 1H, 13-H), 4.14-4.10 (m, 1H, 3-H), 3.64 (dd, *J* = 17.8, 2.4 Hz, 1H, 2-H), 3.52 (dd, *J* = 11.5, 8.0 Hz, 1H, 12-H), 3.11 (dd, *J* = 17.8, 9.4 Hz, 1H, 2-H), 3.03 (dd, *J* = 11.5, 1.0 Hz, 1H, 12-H), 2.78 (br, 1H, OH), 2.37 (dsept, *J* = 7.0, 6.8 Hz, 1H, 14-H), 1.58-1.54 (m, 1H, 4-H), 1.50-1.46 (m, 1H, 4-H), 1.33-1.24 (m, 10H, 5-H, 6-H, 7-H, 8-H, 9-H), 1.07 (d, *J* = 6.8 Hz, 3H, 15-H), 0.98 (d, *J* = 6.8 Hz, 3H, 15-H), 0.88 (t, *J* = 7.0 Hz, 3H, 10-H) ppm.

Analytical data are in accordance with those reported in the literature.<sup>[5]</sup>

**(S)-3-((*tert*-butyldimethylsilyl)oxy)-1-((S)-4-isopropyl-2-thioxothiazolidin-3-yl)decan-1-one (40)**

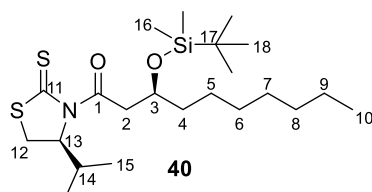

A stirred solution of secondary alcohol **39** (3.77 g, 11.4 mmol, 1.0 equiv.) in CH<sub>2</sub>Cl<sub>2</sub> (56.0 mL, 0.2 M) was cooled to -78 °C. Addition of TBSOTf (3.90 mL, 17.0 mmol, 1.5 equiv.) and 2,6-

lutidine (1.99 mL, 17.0 mmol, 1.5 equiv.) was followed by stirring for 30 minutes at -78 °C and after warming up to room temperature stirring was continued for another three hours. Subsequently, the reaction was quenched with saturated aqueous NH<sub>4</sub>Cl solution. The resulting phases were separated and the aqueous one was extracted three times with CH<sub>2</sub>Cl<sub>2</sub>. The combined organic phases were washed with brine, dried over MgSO<sub>4</sub> and filtrated. Purification *via* flash chromatography (SiO<sub>2</sub>, cyclohexane:EtOAc / 49:1) yielded silylether **40** (4.34 g, 9.73 mmol, 86%) as a yellow oil.

**R<sub>f</sub>** : (cyclohexane:EtOAc / 49:1) = 0.19. **<sup>1</sup>H-NMR** (500 MHz, CDCl<sub>3</sub>):  $\delta$  = 5.05 (ddd,  $J$  = 7.5, 6.5, 0.9 Hz, 1H, 13-H), 4.31-4.27 (m, 1H, 3-H), 3.56 (dd,  $J$  = 17.0, 7.9 Hz, 1H, 2-H), 3.47 (dd,  $J$  = 11.4, 7.8 Hz, 1H, 12-H), 3.12 (dd,  $J$  = 17.0, 4.0 Hz, 1H, 2-H), 3.02 (dd,  $J$  = 11.4, 0.9 Hz, 1H, 12-H), 2.39 (dsept,  $J$  = 7.0, 6.8 Hz, 1H, 14-H), 1.52-1.48 (m, 2H, 4-H), 1.31-1.27 (m, 10H, 5-H, 6-H, 7-H, 8-H, 9-H), 1.06 (d,  $J$  = 6.8 Hz, 3H, 15-H), 0.98 (d,  $J$  = 6.8 Hz, 3H, 15-H), 0.88 (t,  $J$  = 7.0 Hz, 3H, 10-H), 0.85 (s, 9H, 18-H), 0.07 (s, 3H, 16-H), 0.03 (s, 3H, 16-H) ppm. **<sup>13</sup>C-NMR** (125 MHz, CDCl<sub>3</sub>):  $\delta$  = 203.0 (q, C-11), 172.4 (q, C-1), 71.8 (t, C-13), 69.4 (t, C-3), 45.5 (s, C-2), 37.8 (s, C-4), 31.9 (s, C-7), 31.1 (s, C-12), 30.9 (t, C-13), 29.8 (s, C-6), 29.4 (s, C-8), 26.0 (p, C-18), 25.1 (s, C-5), 22.8 (s, C-9), 19.3 (p, C-15), 18.2 (q, C-17), 18.1 (p, C-15), 14.3 (p, C-10), -4.3 (p, C-16), -4.5 (p, C-16) ppm. **HRMS** [ESI<sup>+</sup>]:  $m/z$  for C<sub>22</sub>H<sub>44</sub>NO<sub>2</sub>S<sub>2</sub>Si [M+H]<sup>+</sup>: calculated = 446.2577, found = 446.2572. [ $\alpha$ ]<sub>D</sub><sup>22</sup>: + 23.4 ° (c = 1.0 in CH<sub>2</sub>Cl<sub>2</sub>).

### (S)-3-((*tert*-butyldimethylsilyl)oxy)decanal (**29**)

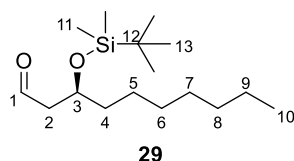

A stirred solution of silylether **40** (3.87 g, 8.68 mmol, 1.0 equiv.) in CH<sub>2</sub>Cl<sub>2</sub> (86.8 mL, 0.1 M) was cooled to -78 °C. After dropwise addition of DIBAL-H (17.4 mL, 17.4 mmol, 2.0 equiv., 1 M in hexane), the mixture was stirred for 30 minutes at -78 °C. Quenching with saturated aqueous NaK-tartrate solution was followed by stirring at room temperature for 2 h. The resulting phases were separated and the aqueous one was extracted three times with CH<sub>2</sub>Cl<sub>2</sub>. Subsequently, the combined organic phases were washed with brine, dried over MgSO<sub>4</sub> and filtrated. Purification *via* flash chromatography (SiO<sub>2</sub>, cyclohexane:EtOAc / 40:1) yielded aldehyde **29** (2.30 g, 8.03 mmol, 93%) as a colourless liquid.

**R<sub>f</sub>**: (cyclohexane:EtOAc / 40:1) = 0.27. **<sup>1</sup>H-NMR** (500 MHz, CDCl<sub>3</sub>):  $\delta$  = 9.81 (t, *J* = 2.5 Hz, 1H, 1-H), 4.17 (p, *J* = 5.9 Hz, 1H, 3-H), 2.51 (dd, *J* = 5.9, 2.5 Hz, 2H, 2-H), 1.54-1.47 (m, 2H, 4-H), 1.31-1.27 (m, 10H, 5-H, 6-H, 7-H, 8-H, 9-H), 0.89-0.87 (m, 12H, 10-H, 13-H), 0.07 (s, 3H, 11-H), 0.05 (s, 3H, 11-H) ppm.

Analytical data are in accordance with those reported in the literature.<sup>[6]</sup>

**(5*R*,7*S*)-5-((*S*)-but-3-en-2-yl)-7-heptyl-2,2,3,3,9,9,10,10-octamethyl-4,8-dioxa-3,9-disilaundecane (31)**

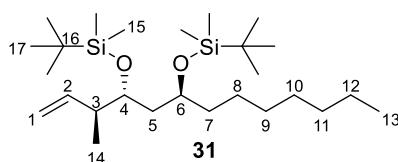

A stirred solution of KO<sup>*t*</sup>Bu (84.2 mg, 750  $\mu$ mol, 1.8 equiv.) in THF (750  $\mu$ L, 1 M) was cooled to -78 °C and precooled *trans*-butene (156  $\mu$ L, 1.67 mmol, 4.0 equiv.) was added. Subsequently, *n*-BuLi (300  $\mu$ L, 750  $\mu$ mol, 1.8 equiv., 2.5 M in hexane) was added dropwise. The resulting yellow solution was warmed to -50 °C and stirred for 30 minutes. After re-cooling to -78 °C, a solution of (-)-Ipc<sub>2</sub>BOMe (278 mg, 880  $\mu$ mol, 2.1 equiv.) in Et<sub>2</sub>O (880  $\mu$ L, 1 M) was added slowly, which resulted in loss of yellow colour. Stirring for 30 minutes was followed by addition of BF<sub>3</sub>·Et<sub>2</sub>O (131  $\mu$ L, 1.04 mmol, 2.5 equiv.), ten minutes of stirring and addition of a solution of aldehyde **29** (120 mg, 410  $\mu$ mol, 1.0 equiv.) in Et<sub>2</sub>O (585  $\mu$ L, 0.7 M). After stirring for 6 h at -78 °C, a premixed solution of NaOH (3.00 mL, 3 M) and H<sub>2</sub>O<sub>2</sub> (3.00 mL, 30%) was added and the solution was stirred overnight at room temperature. The resulting phases were separated and the aqueous one was extracted three times with Et<sub>2</sub>O. Combined organic phases were washed with brine, dried over MgSO<sub>4</sub> and filtrated. The crude secondary alcohol was subsequently protected, following general procedure 2. DMF (410  $\mu$ L, 1 M), TBSCl (92.3 mg, 614  $\mu$ mol, 1.5 equiv.) and Imidazole (69.8 mg, 1.03 mmol, 2.5 equiv.) were used. Purification by flash chromatography (SiO<sub>2</sub>, pentane) yielded product **31** (144 mg, 316  $\mu$ mol, 77% over two steps) as a colourless liquid.

**R<sub>f</sub>**: (pentane) = 0.46. **<sup>1</sup>H-NMR** (500 MHz, CDCl<sub>3</sub>):  $\delta$  = 5.82-5.75 (m, 1H, 2-H), 5.03-4.99 (m, 2H, 1-H), 3.74-3.68 (m, 2H, 4-H, 6-H), 2.31-2.25 (m, 1H, 3-H), 1.53-1.39 (m, 4H, 5-H, 7-H), 1.31-1.25 (m, 10H, 8-H, 9-H, 10-H, 11-H, 12-H), 0.99 (d, *J* = 6.9 Hz, 3H, 14-H), 0.89-0.88 (m, 12H, 13-H, 17-H), 0.87 (s, 9H, 17-H), 0.06 (s, 3H, 16-H), 0.05 (s, 3H, 16-H), 0.04 (s, 3H, 16-

H), 0.03 (s, 3H, 16-H) ppm. **<sup>13</sup>C-NMR** (125 MHz, CDCl<sub>3</sub>):  $\delta$  = 140.7 (t, C-2), 114.8 (s, C-1), 73.5 (t, C-4), 70.4 (t, C-6), 43.6 (t, C-3), 41.7 (s, C-5), 38.0 (s, C-7), 32.0 (s, C-10), 29.9 (s, C-9), 29.5 (s, C-11), 26.08 (p, C-17), 26.05 (p, C-17), 25.2 (s, C-8), 22.8 (s, C-12), 18.3 (q, C-16), 15.2 (p, C-14), 14.3 (p, C-13), -3.7 (p, C-15), -4.0 (p, C-15), -4.1 (p, C-15), -4.2 (p, C-15) ppm. **HRMS** [ESI<sup>+</sup>]:  $m/z$  for C<sub>26</sub>H<sub>57</sub>O<sub>2</sub>Si<sub>2</sub> [M+H]<sup>+</sup>: calculated = 457.3892, found = 457.3892. [ $\alpha$ ]<sub>22</sub><sup>D</sup>: + 2.9 ° (c = 1.0 in CH<sub>2</sub>Cl<sub>2</sub>).

***S*-(2-acetamidoethyl) (6*S*,7*R*,9*S*,*E*)-7,9-bis((*tert*-butyldimethylsilyl)oxy)-2,6-dimethylhexadec-2-enethioate (**32**)**

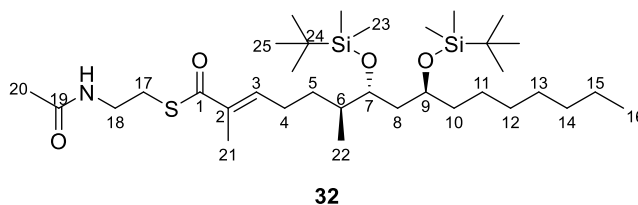

The reaction was carried out as described in general procedure 3. A solution of alkene **31** (80.0 mg, 175  $\mu$ mol, 1.5 equiv.) in THF (175  $\mu$ L, 1 M), 9-BBN (350  $\mu$ L, 175  $\mu$ mol, 1.5 equiv., 0.5 M in THF), DMF (585  $\mu$ L, total 0.2 M), vinyl iodide **13b** (36.5 mg, 117  $\mu$ mol, 1.0 equiv.), PdCl<sub>2</sub>(dppf) (6.1 mg, 8.33  $\mu$ mol, 5 mol%), AsPh<sub>3</sub> (2.6 mg, 8.33  $\mu$ mol, 5 mol%) and Cs<sub>2</sub>CO<sub>3</sub> (76.0 mg, 234  $\mu$ mol, 2.0 equiv.) were used. Purification by flash chromatography (SiO<sub>2</sub>, cyclohexane:EtOAc / 2:1) yielded product **32** (59.4 mg, 92.2  $\mu$ mol, 79%) as a yellowish oil.

**R<sub>f</sub>** : (cyclohexane:EtOAc / 2:1) = 0.21. **<sup>1</sup>H-NMR** (500 MHz, CDCl<sub>3</sub>):  $\delta$  = 6.76 (tq,  $J$  = 7.3, 1.3 Hz, 1H, 3-H), 5.88 (br, 1H, N-H) 3.76-3.71 (m, 2H, 7-H, 9-H), 3.47-3.43 (m, 2H, 18-H), 3.07 (t,  $J$  = 6.3 Hz, 2H, 17-H), 2.29-2.25 (m, 1H, 4-H), 2.21-2.17 (m, 1H, 4-H), 1.97 (s, 3H, 20-H), 1.88 (d,  $J$  = 1.3 Hz, 3H, 21-H), 1.61-1.58 (m, 1H, 6-H), 1.45-1.43 (m, 4H, 8-H, 10-H), 1.30-1.24 (m, 12H, 5-H, 11-H, 12-H, 13-H, 14-H, 15-H), 0.89-0.88 (m, 24H, 16-H, 22-H, 25-H), 0.06-0.04 (m, 12H, 23-H) ppm. **<sup>13</sup>C-NMR** (125 MHz, CDCl<sub>3</sub>):  $\delta$  = 194.2 (q, C-19), 170.4 (q, C-1), 142.4 (t, C-3), 136.0 (q, C-2), 73.4 (t, C-7), 70.6 (t, C-9), 40.4 (s, C-8), 40.1 (s, C-18), 38.8 (t, C-6), 38.5 (s, C-10), 32.0 (s, C-14), 31.1 (s, C-5), 29.9 (s, C-12), 29.5 (s, C-13), 28.5 (s, C-17), 27.0 (s, C-4), 26.1 (p, C-25), 26.0 (p, C-25), 25.1 (s, C-11), 23.4 (p, C-20), 22.8 (s, C-15), 18.3 (q, C-24), 14.5 (p, C-22), 14.3 (p, C-16), 12.6 (p, C-21), -3.6 (p, C-23), -3.9 (p, C-23), -4.0 (p, C-23), -4.1 (p, C-23) ppm. **HRMS** [ESI<sup>+</sup>]:  $m/z$  for C<sub>34</sub>H<sub>69</sub>NO<sub>4</sub>SSi<sub>2</sub>Na [M+Na]<sup>+</sup>: calculated = 666.4378, found = 666.4363. [ $\alpha$ ]<sub>22</sub><sup>D</sup>: + 7.8 ° (c = 0.23 in CH<sub>2</sub>Cl<sub>2</sub>).

***S*-(2-acetamidoethyl) (6*S*,7*R*,9*S*,*E*)-7,9-dihydroxy-2,6-dimethylhexadec-2-enethioate (**33**)**

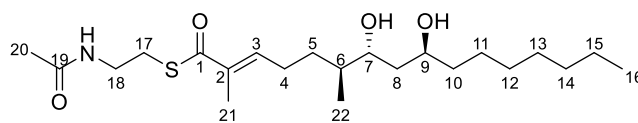

**33**

The reaction was carried out as described in general procedure 4. A solution of silylether **32** (10.0 mg, 15.5  $\mu$ mol, 1.0 equiv.) in THF (80  $\mu$ L), HF\*pyridine (10  $\mu$ L, ~70% HF) and pyridine (20  $\mu$ L) were used and the reaction ran for three days. Purification by semi-preparative HPLC yielded product **33** (6.0 mg, 14.4  $\mu$ mol, 93%) as a yellowish oil.

**R<sub>f</sub>**: (EtOAc) = 0.23. **<sup>1</sup>H-NMR** (500 MHz, CDCl<sub>3</sub>):  $\delta$  = 6.78 (tq,  $J$  = 7.0, 1.2 Hz, 1H, 3-H), 5.93 (br, 1H, N-H) 3.96-3.92 (m, 1H, 9-H), 3.75 (ddd,  $J$  = 8.9, 6.4, 2.4 Hz, 1H, 7-H), 3.47-3.43 (m, 2H, 18-H), 3.06 (t,  $J$  = 6.4 Hz, 2H, 17-H), 2.36-2.28 (m, 1H, 4-H), 2.24-2.07 (m, 3H, 4-H, OH), 1.96 (s, 3H, 20-H), 1.88 (d,  $J$  = 1.2 Hz, 3H, 21-H), 1.76-1.69 (m, 1H, 5-H), 1.68-1.47 (m, 5H, 6-H, 8-H, 10-H), 1.44-1.40 (m, 1H, 11-H), 1.34-1.26 (m, 10H, 5-H, 11-H, 12-H, 13-H, 14-H, 15-H), 0.91 (d,  $J$  = 6.8 Hz, 3H, 22-H), 0.88 (t,  $J$  = 7.3 Hz, 3H, 16-H) ppm. **<sup>13</sup>C-NMR** (125 MHz, CDCl<sub>3</sub>):  $\delta$  = 194.2 (q, C-19), 170.7 (q, C-1), 142.4 (t, C-3), 136.0 (q, C-2), 72.8 (t, C-7), 69.8 (t, C-9), 40.0 (s, C-18), 38.9 (s, C-8), 38.6 (t, C-6), 37.6 (s, C-10), 31.9 (s, C-14), 31.3 (s, C-5), 29.7 (s, C-12), 29.4 (s, C-13), 28.6 (s, C-17), 26.6 (s, C-4), 26.0 (s, C-11), 23.3 (p, C-20), 22.8 (s, C-15), 15.2 (p, C-22), 14.3 (p, C-16), 12.6 (p, C-21) ppm. **HRMS** [ESI<sup>+</sup>]:  $m/z$  for C<sub>22</sub>H<sub>41</sub>NO<sub>4</sub>SN<sub>a</sub> [M+Na]<sup>+</sup>: calculated = 438.2649, found = 438.2638. [ $\alpha$ ]<sub>22</sub><sup>D</sup>: - 2.5 ° (c = 0.76 in CH<sub>2</sub>Cl<sub>2</sub>).

## References Supporting Information

- [1] Li Y.; Zhang W.; Zhang H.; Tian W.; Wu L.; Wang S.; Zheng M.; Zhang J.; Sun Ch.; Deng Z.; Sun Y.; Qu X.; Zhou J., *Angew. Chem. Int.Ed.* **2018**, *57*, 5823–5827; *Angew. Chem.* **2018**, *130*, 5925–5929. <https://doi.org/10.1002/ange.201802805>.
- [2] Campbell N.; Sammis G., *Angew. Chem. Int. Ed. Engl.* **2014**, *53*, 6228. <https://doi.org/10.1002/anie.201403234>.
- [3] Whittaker A.; Lalic G., *Organic letters* **2013**, *15*, 1112. <https://doi.org/10.1021/ol4001679>.
- [4] Baldwin J.; Moloney M.; Parsons A., *Tetrahedron* **1992**, *48*, 9373. [https://doi.org/10.1016/S0040-4020\(01\)85626-X](https://doi.org/10.1016/S0040-4020(01)85626-X).

# NMR-Spectra

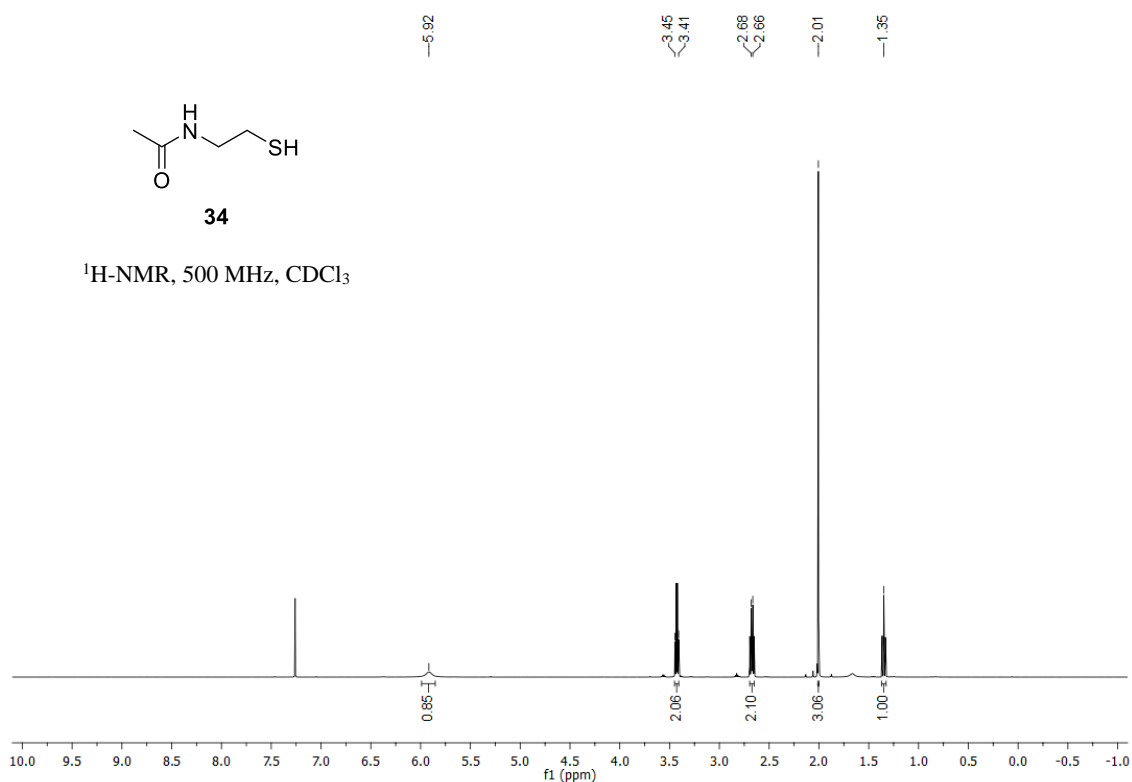

Figure S1: <sup>1</sup>H-NMR-spectrum of *N*-acetylcysteamine (**34**) in CDCl<sub>3</sub>.

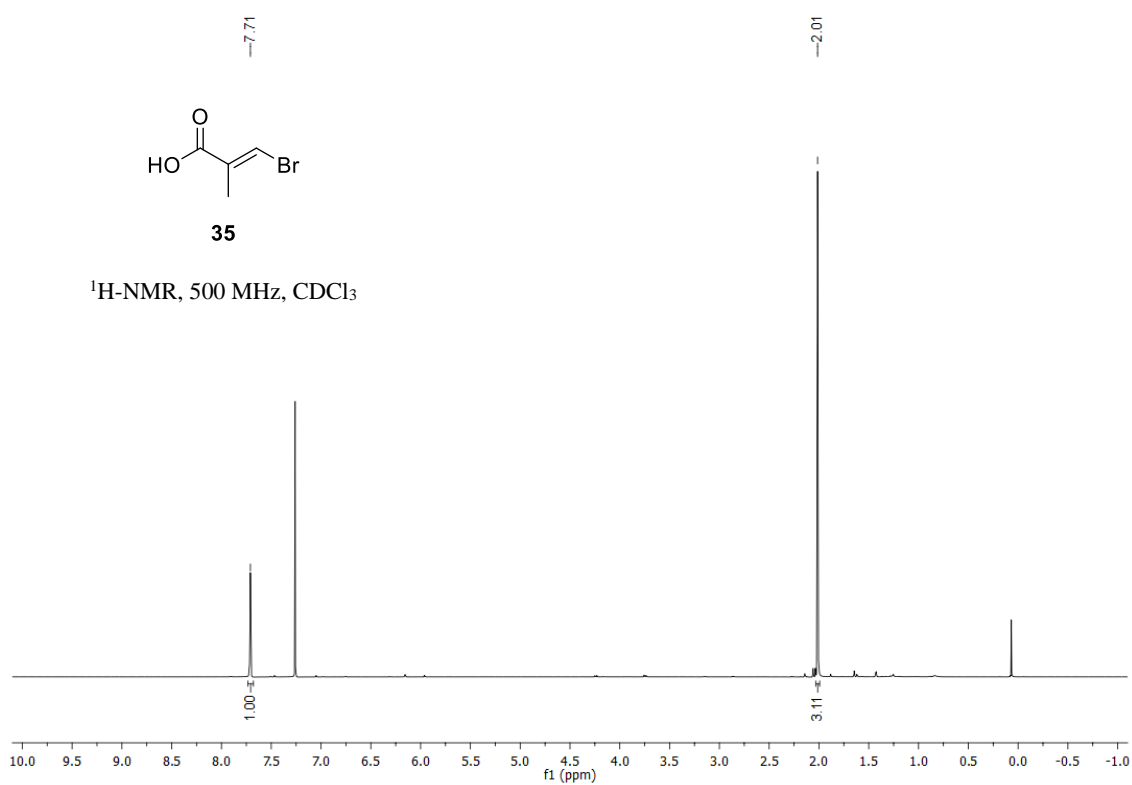

Figure S2: <sup>1</sup>H-NMR-spectrum of carboxylic acid **35** in CDCl<sub>3</sub>.

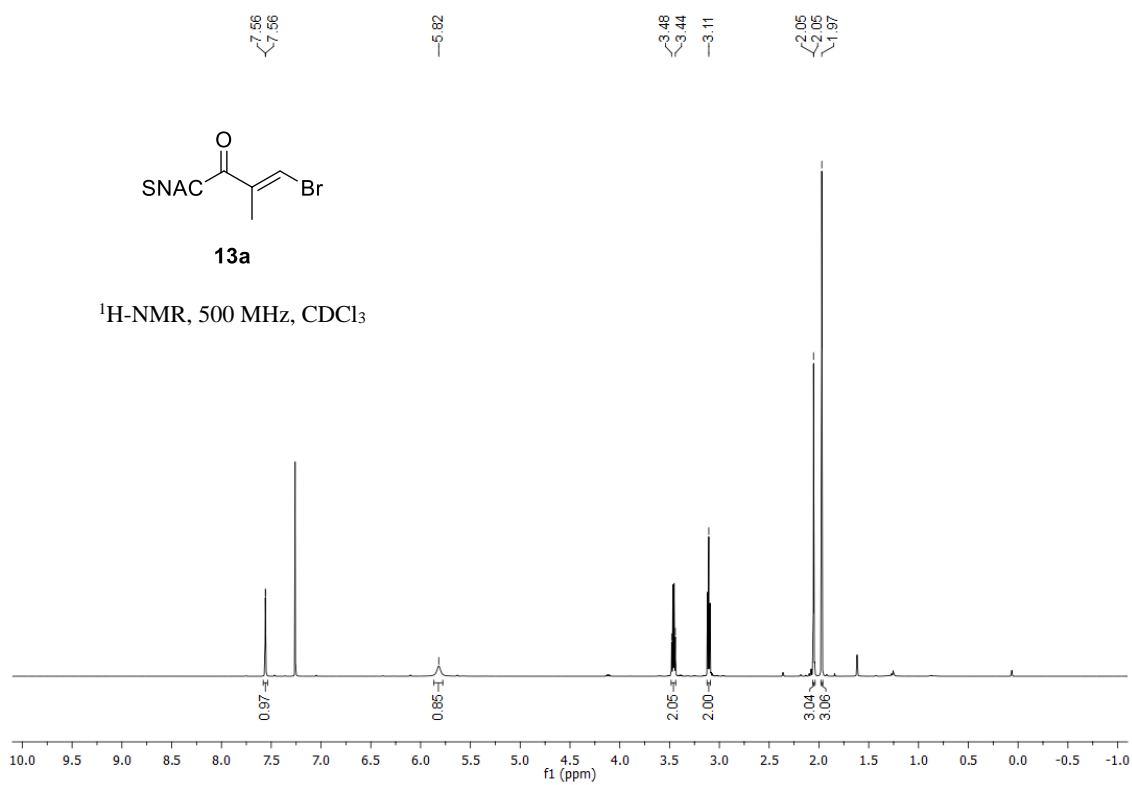

Figure S3: <sup>1</sup>H-NMR-spectrum of thioester **13a** in CDCl<sub>3</sub>.

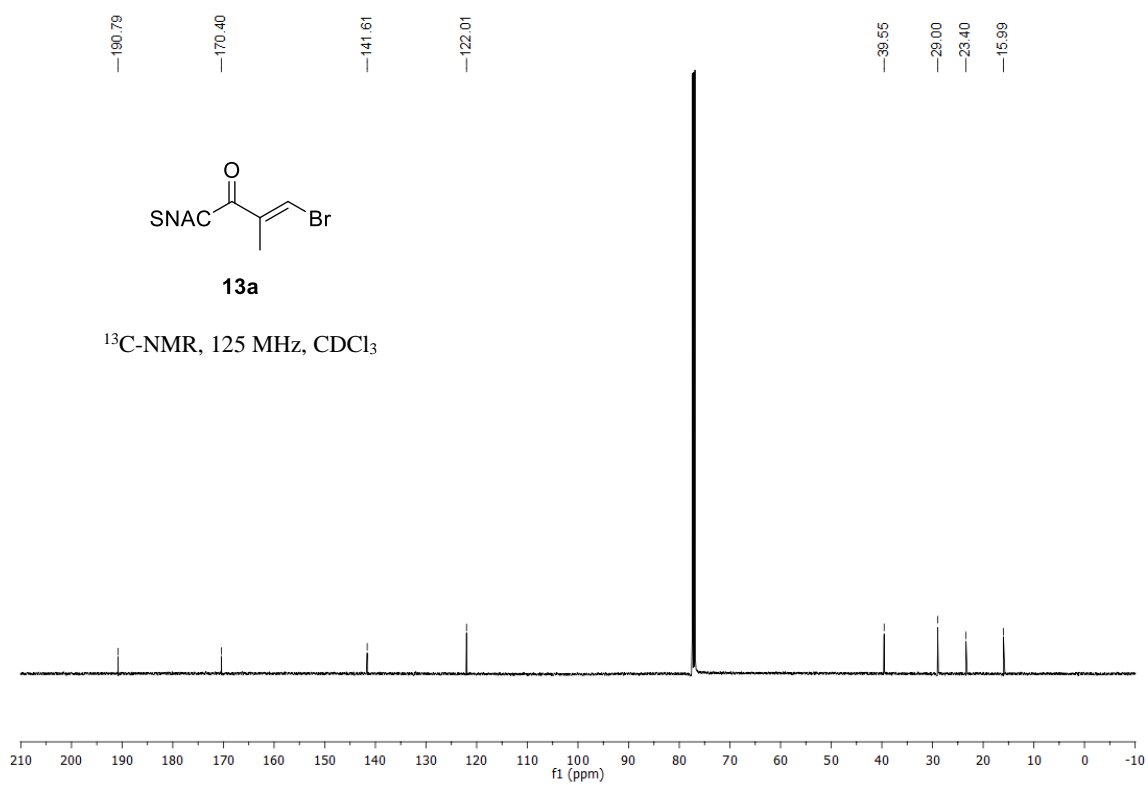

Figure S4: <sup>13</sup>C-NMR-spectrum of thioester **13a** in CDCl<sub>3</sub>.

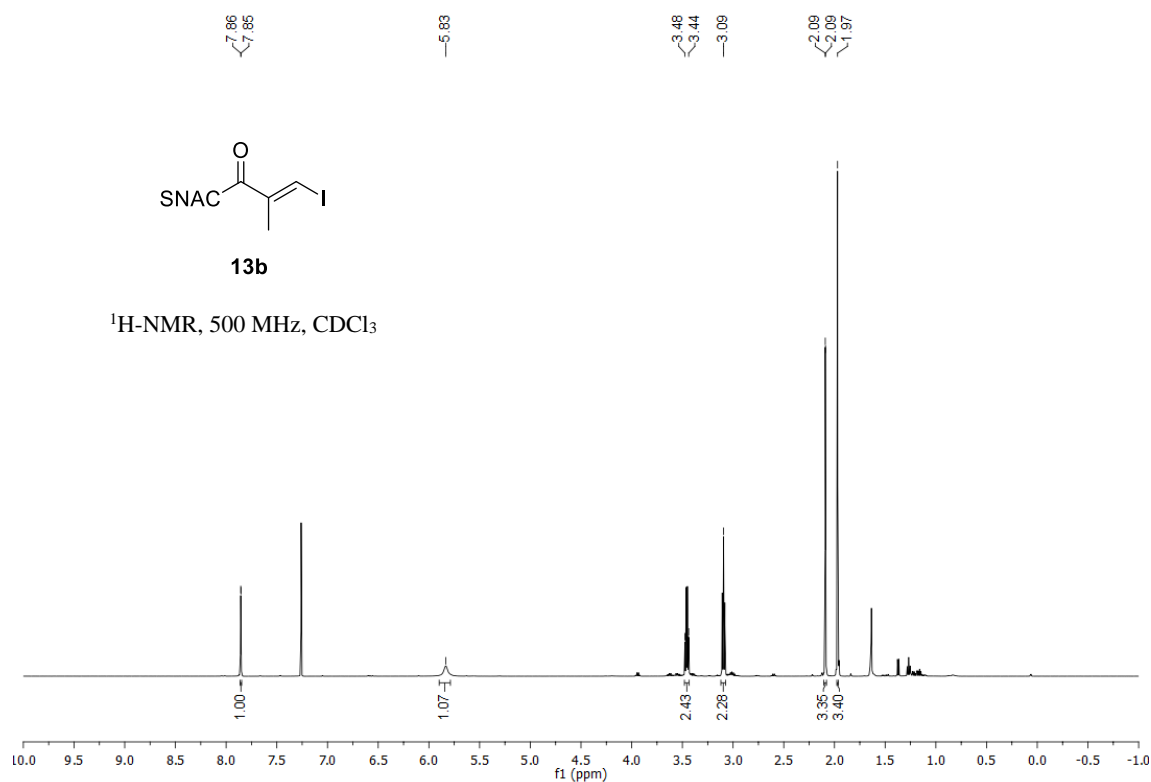

Figure S5:  $^1\text{H}$ -NMR-spectrum of thioester **13b** in  $\text{CDCl}_3$ .

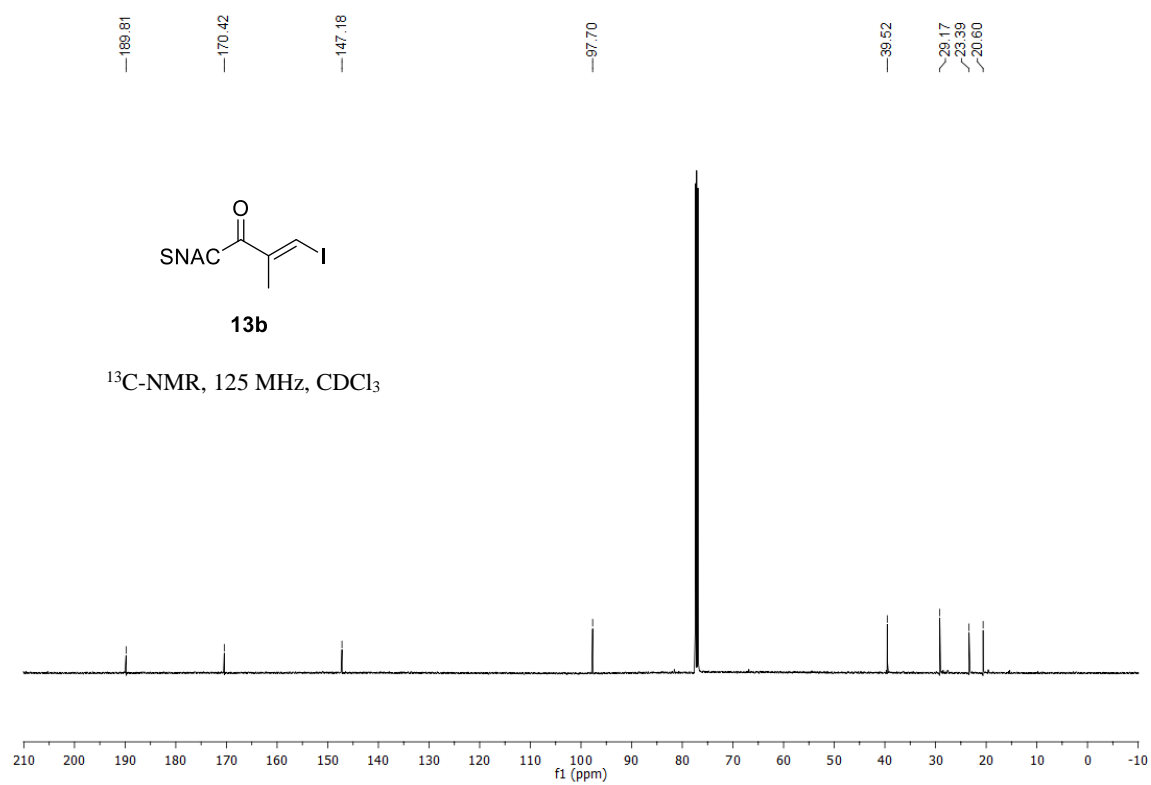

Figure S6:  $^{13}\text{C}$ -NMR-spectrum of thioester **13b** in  $\text{CDCl}_3$ .

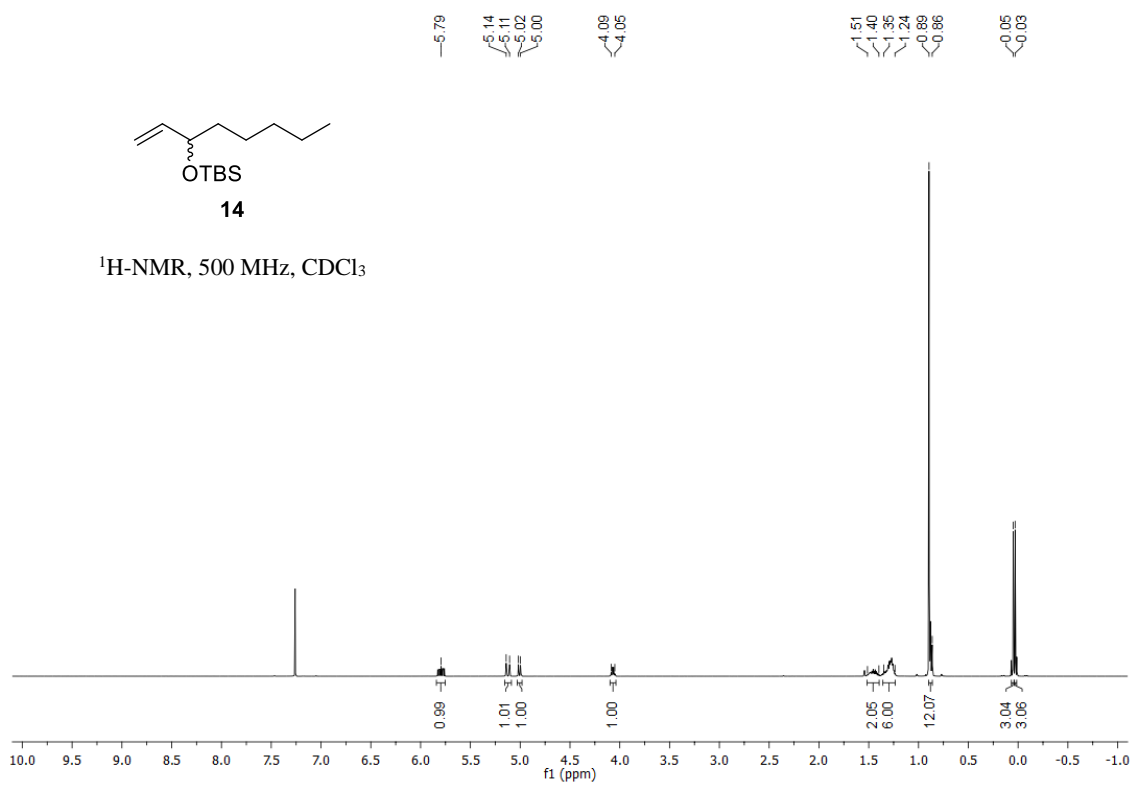

Figure S7: <sup>1</sup>H-NMR-spectrum of silyl ether **14** in CDCl<sub>3</sub>.

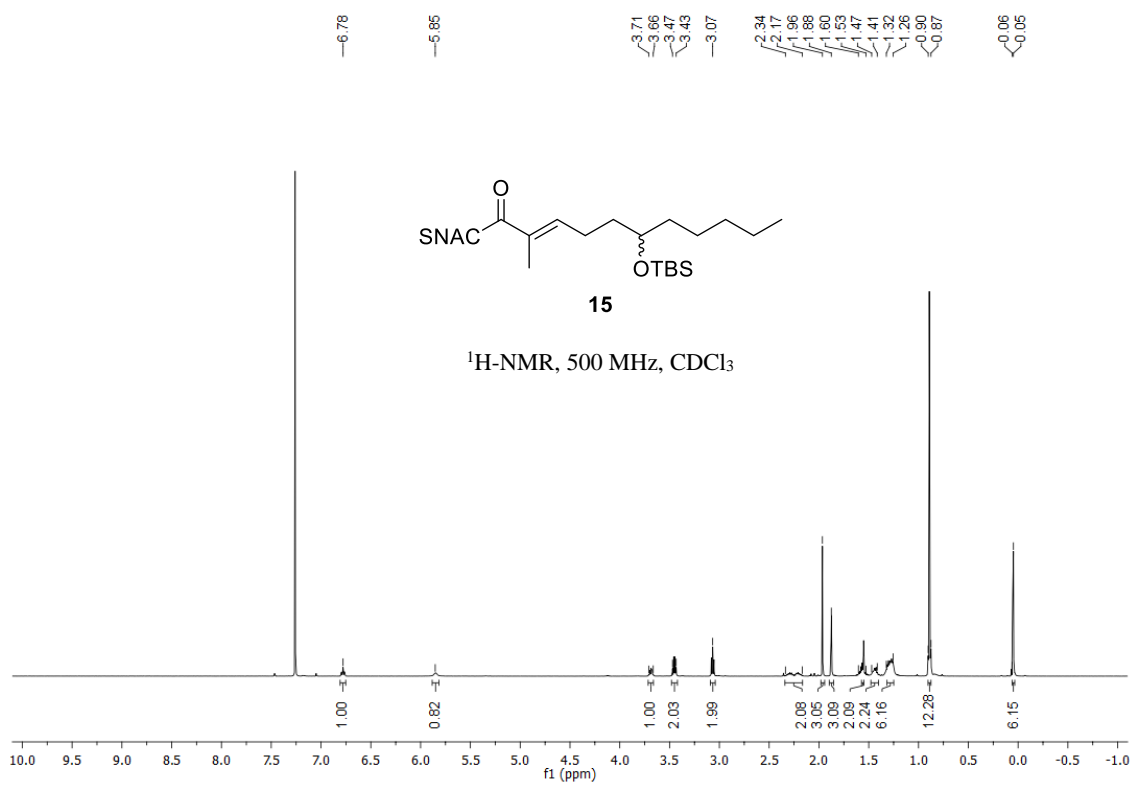

Figure S8: <sup>1</sup>H-NMR-spectrum of  $\alpha,\beta$ -unsaturated thioester **15** in CDCl<sub>3</sub>.

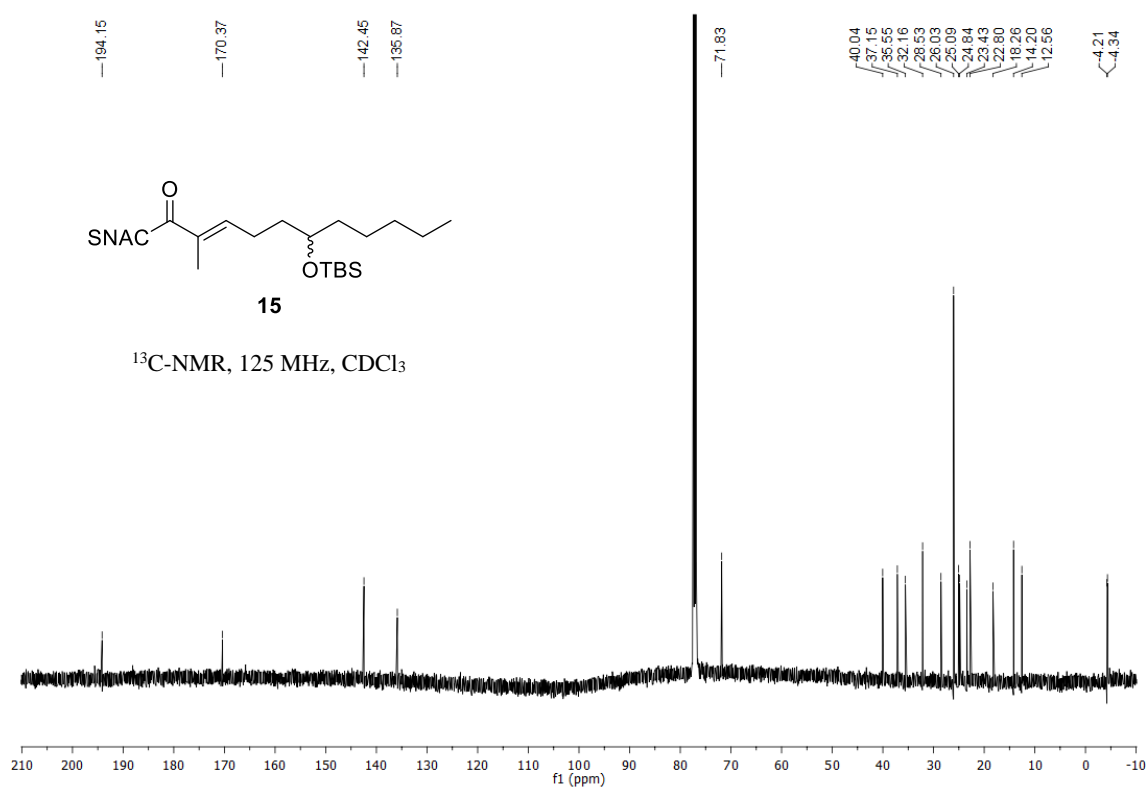

Figure S9: <sup>13</sup>C-NMR-spectrum of α,β-unsaturated thioester **15** in CDCl<sub>3</sub>.

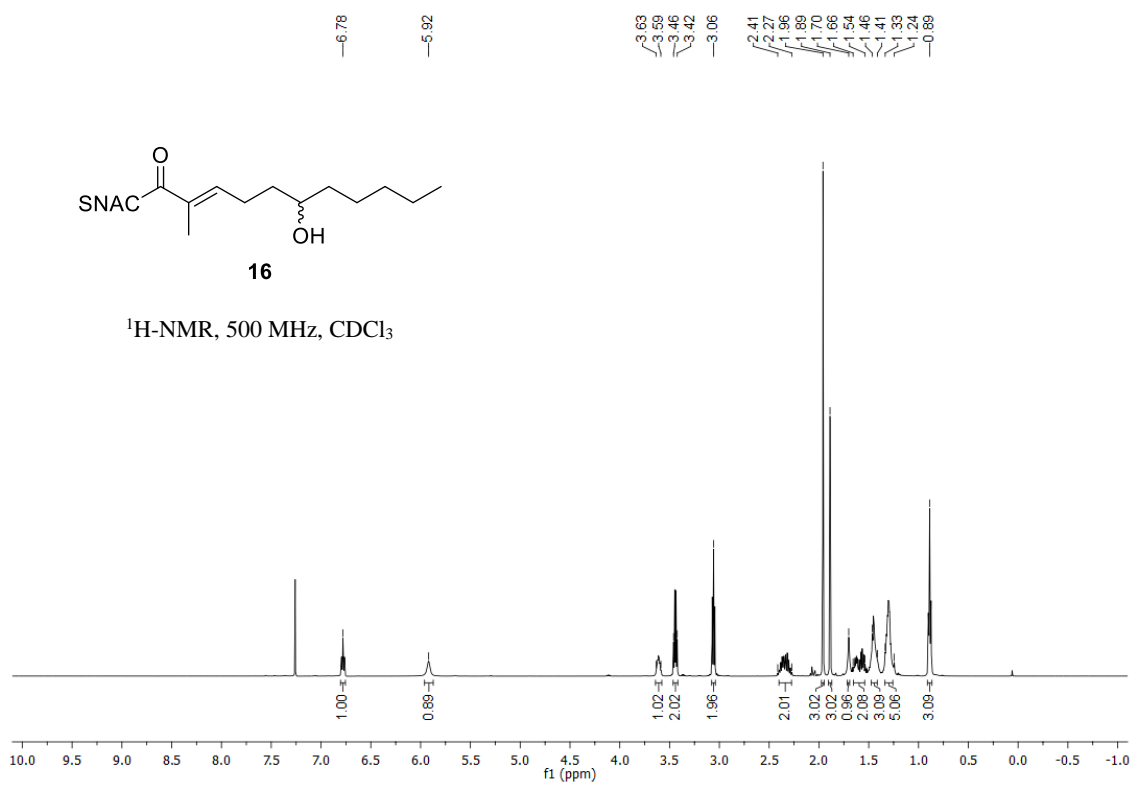

Figure S10: <sup>1</sup>H-NMR-spectrum of α,β-unsaturated thioester **16** in CDCl<sub>3</sub>.

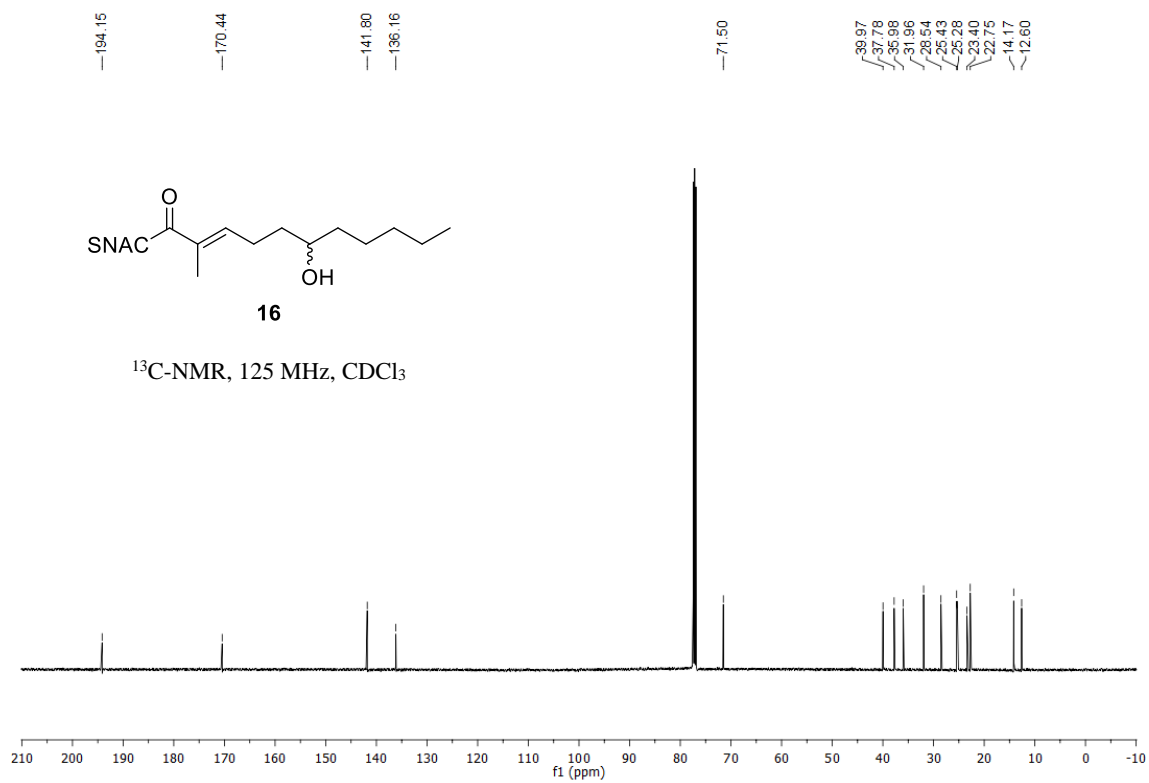

Figure S11: <sup>13</sup>C-NMR-spectrum of α,β-unsaturated thioester **16** in CDCl<sub>3</sub>.

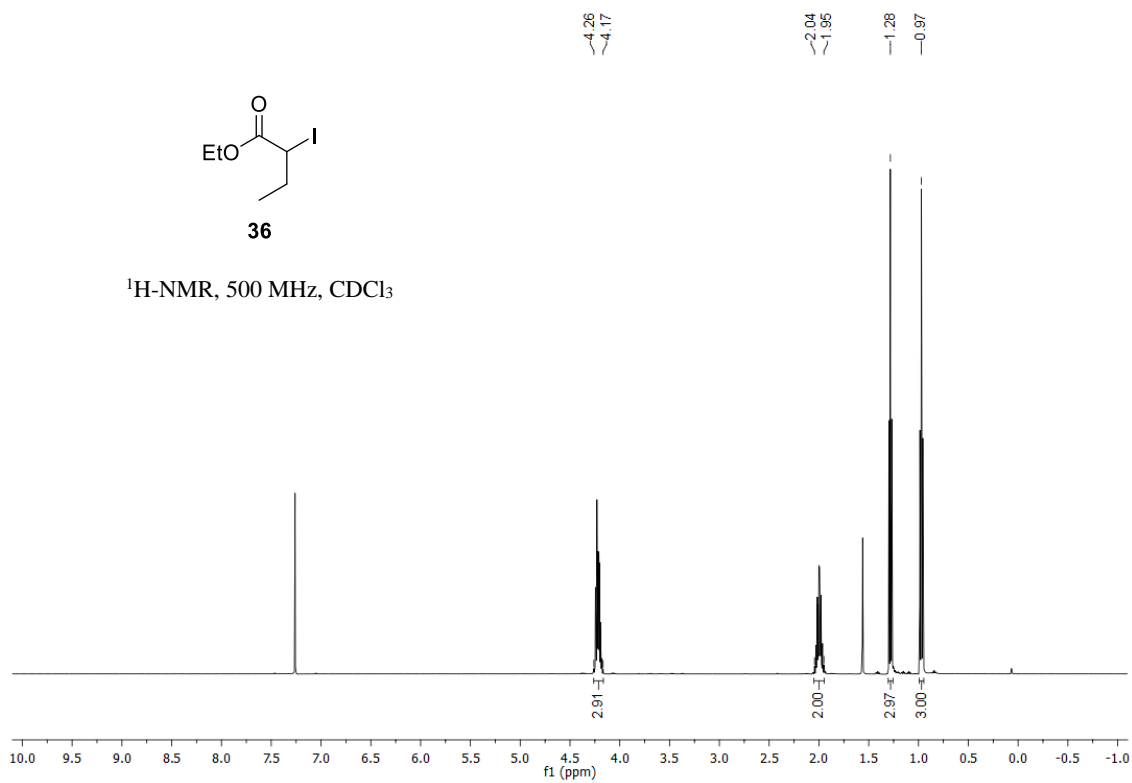

Figure S12: <sup>1</sup>H-NMR-spectrum of alkyl iodide **36** in CDCl<sub>3</sub>.

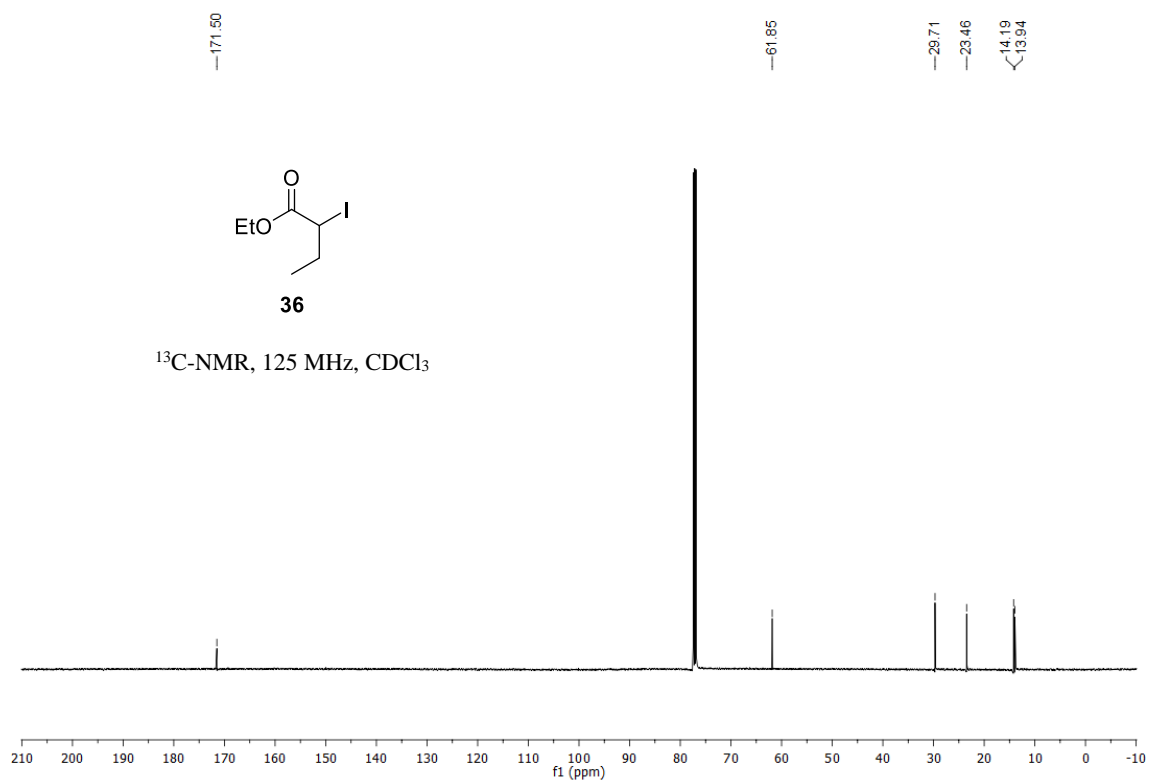

Figure S13: <sup>13</sup>C-NMR-spectrum of alkyl iodide **36** in CDCl<sub>3</sub>.

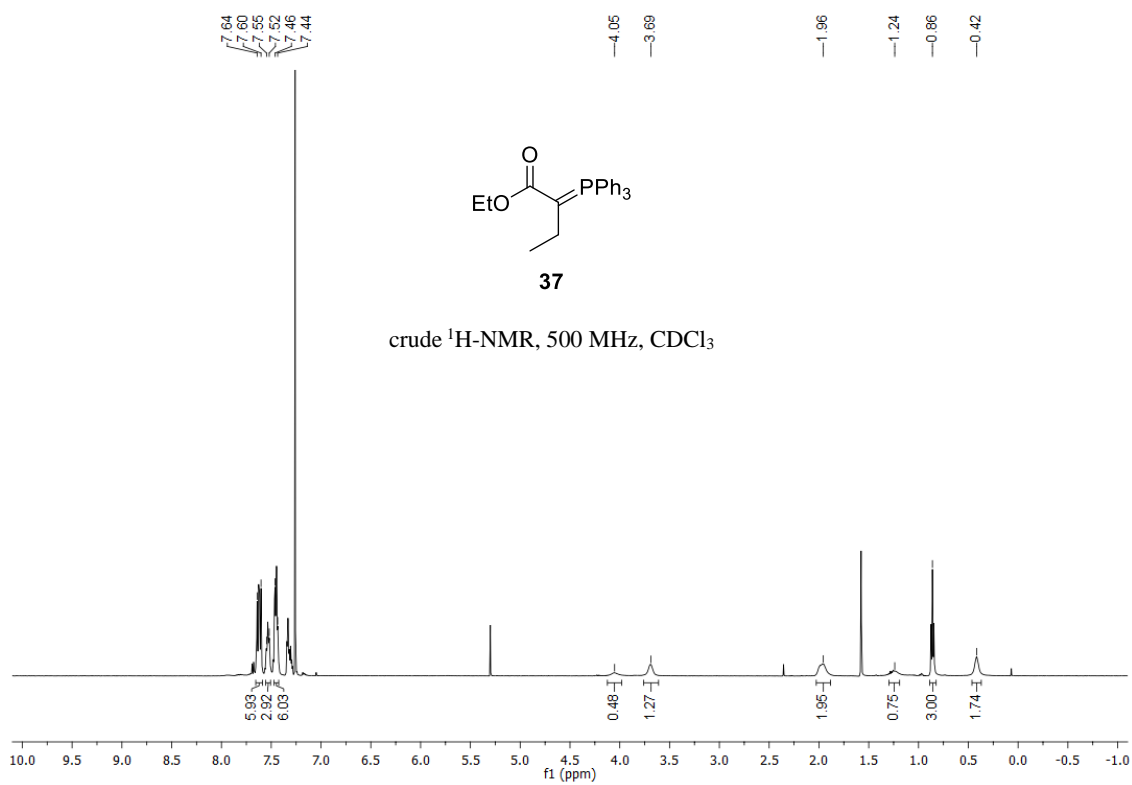

Figure S14: <sup>1</sup>H-NMR-spectrum of crude ylide **37** in CDCl<sub>3</sub>, containing residual signals of CH<sub>2</sub>Cl<sub>2</sub> and toluene.

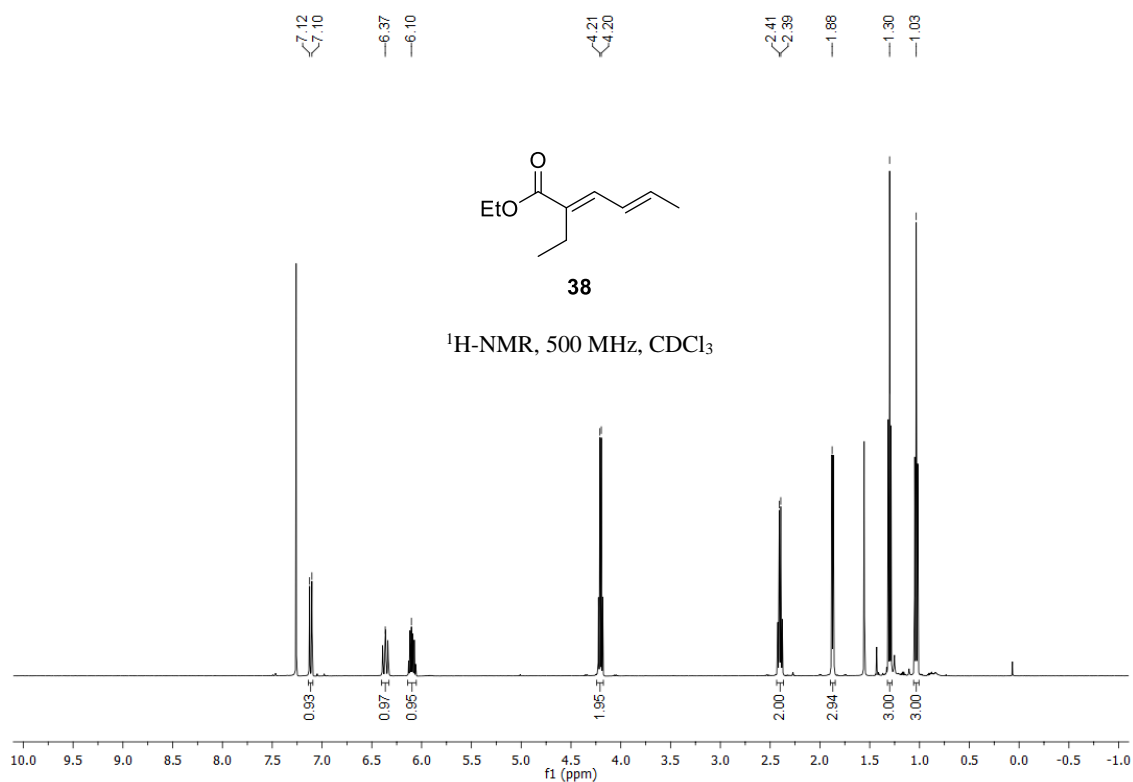

Figure S15: <sup>1</sup>H-NMR-spectrum of ethyl ester **38** in CDCl<sub>3</sub>.

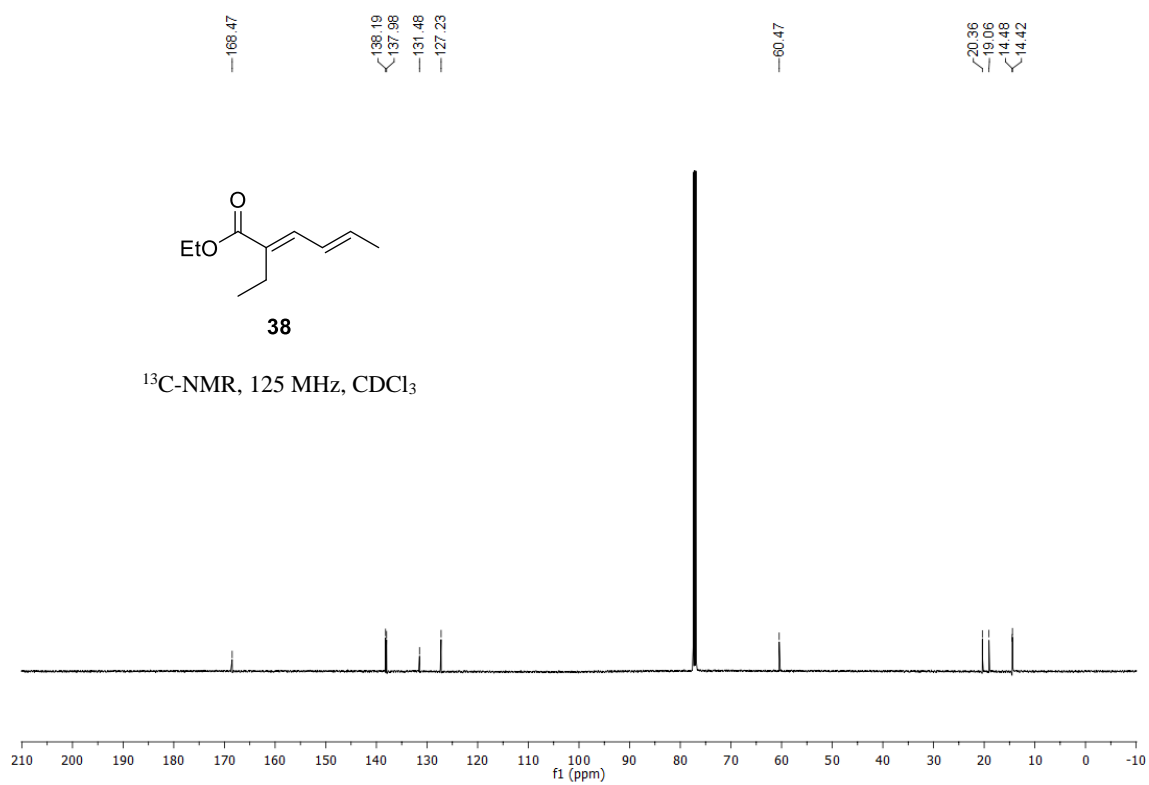

Figure S16: <sup>13</sup>C-NMR-spectrum of ethyl ester **38** in CDCl<sub>3</sub>.

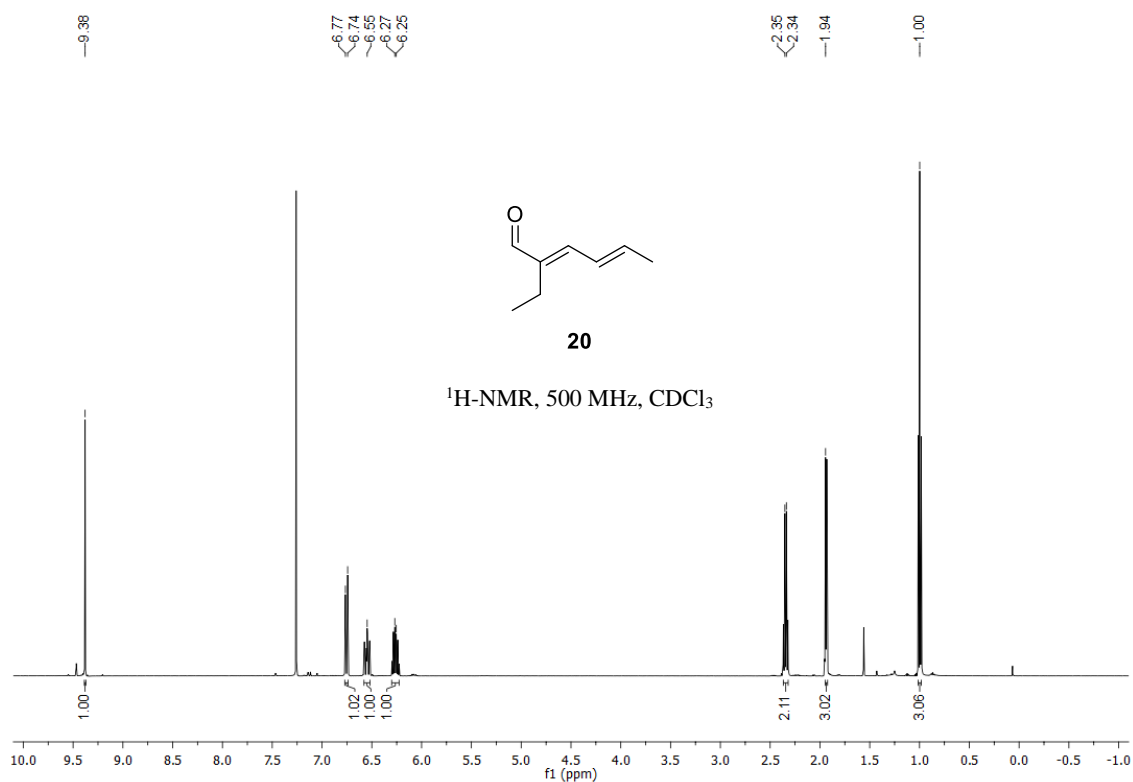

Figure S17: <sup>1</sup>H-NMR-spectrum of aldehyde **20** in CDCl<sub>3</sub>.

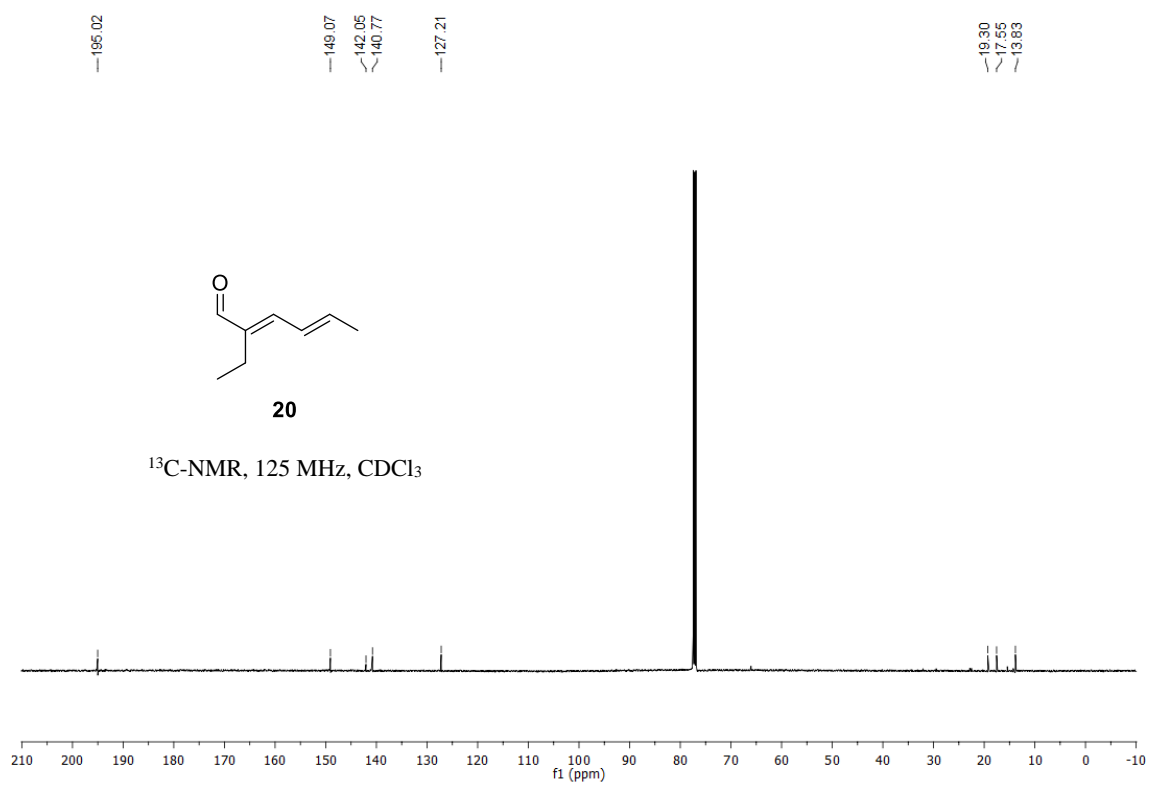

Figure S18: <sup>13</sup>C-NMR-spectrum of aldehyde **20** in CDCl<sub>3</sub>.

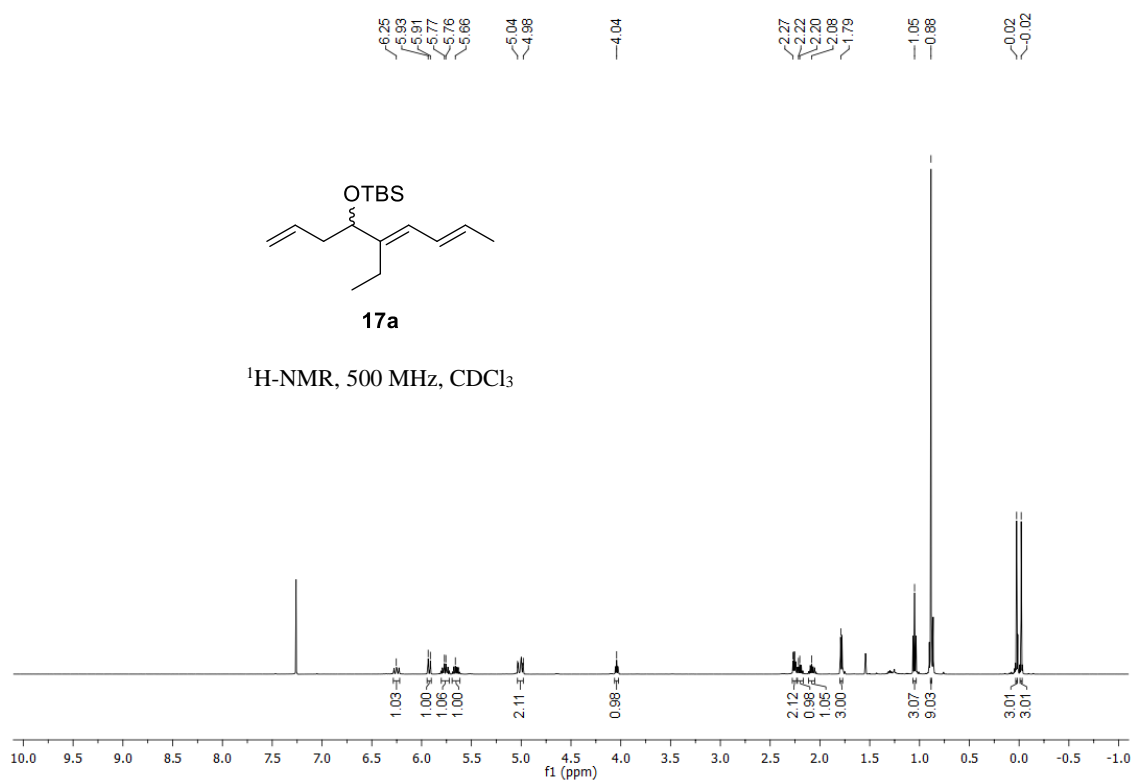

Figure S19: <sup>1</sup>H-NMR-spectrum of silyl ether **17a** in CDCl<sub>3</sub>.

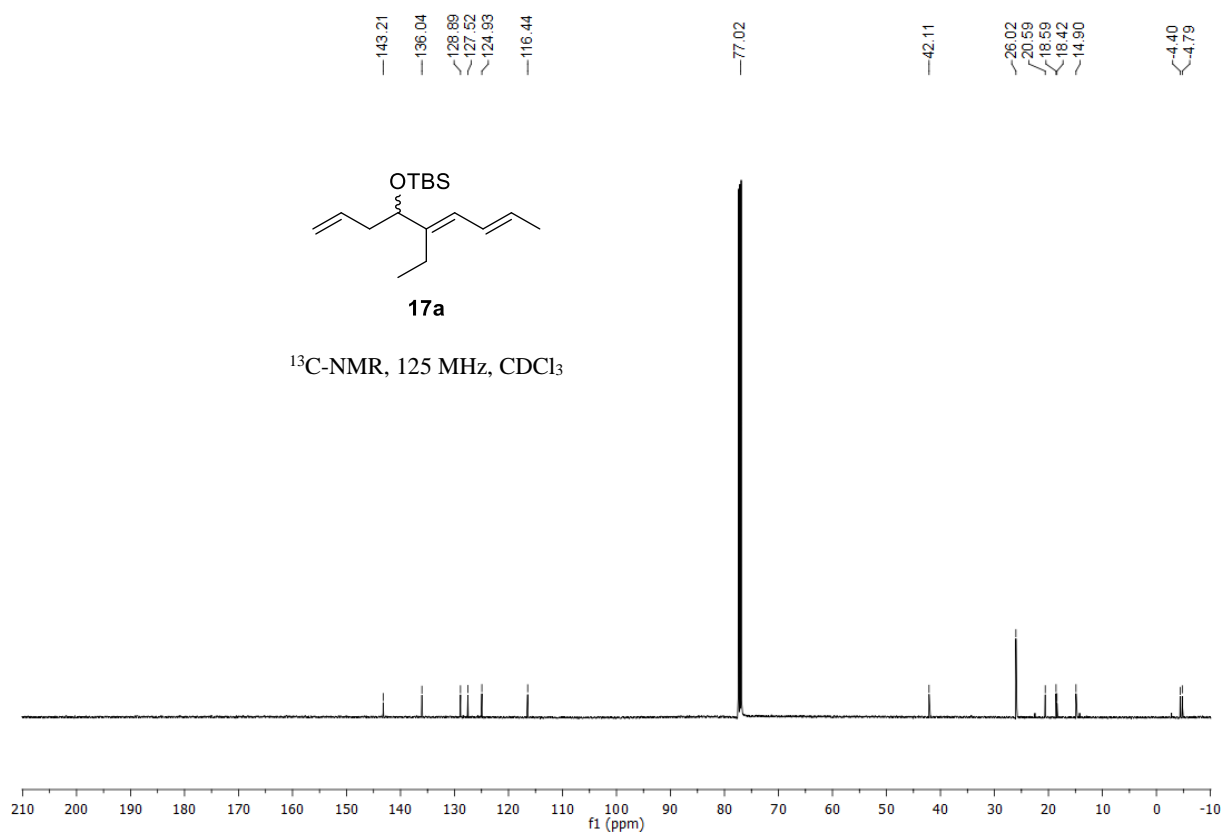

Figure S20: <sup>13</sup>C-NMR-spectrum of silyl ether **17a** in CDCl<sub>3</sub>.

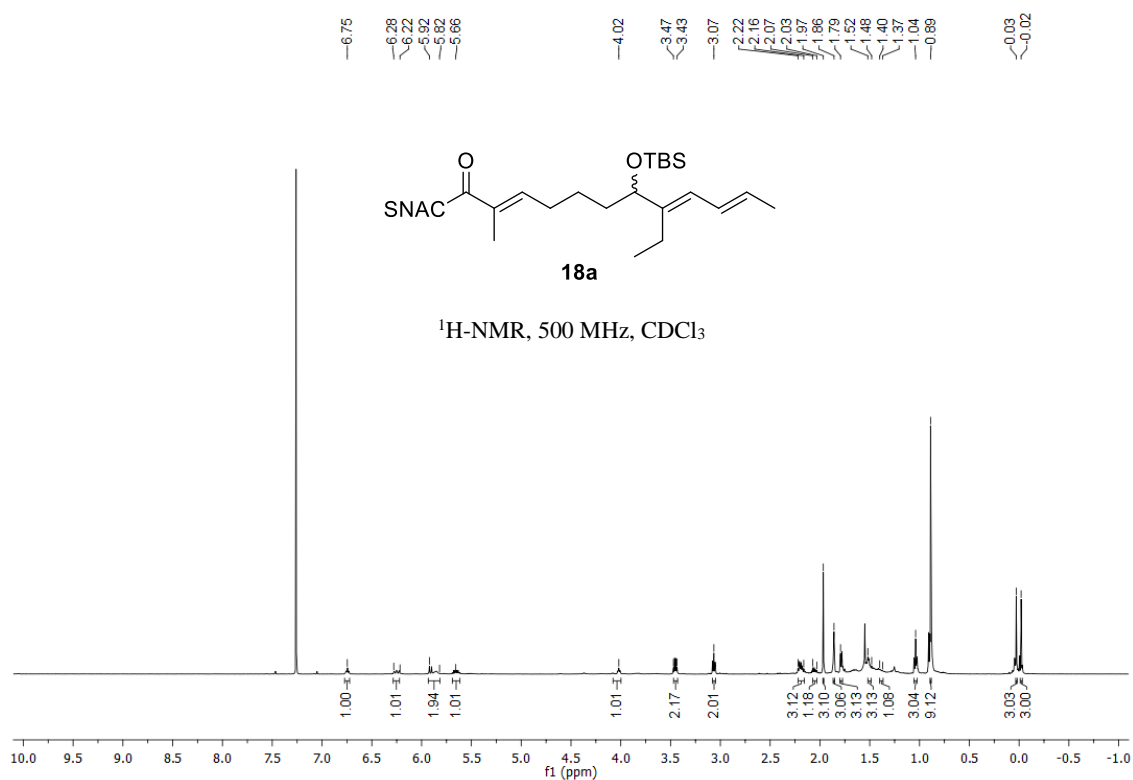

Figure S21:  $^1\text{H-NMR}$ -spectrum of  $\alpha,\beta$ -unsaturated thioester **18a** in  $\text{CDCl}_3$ .

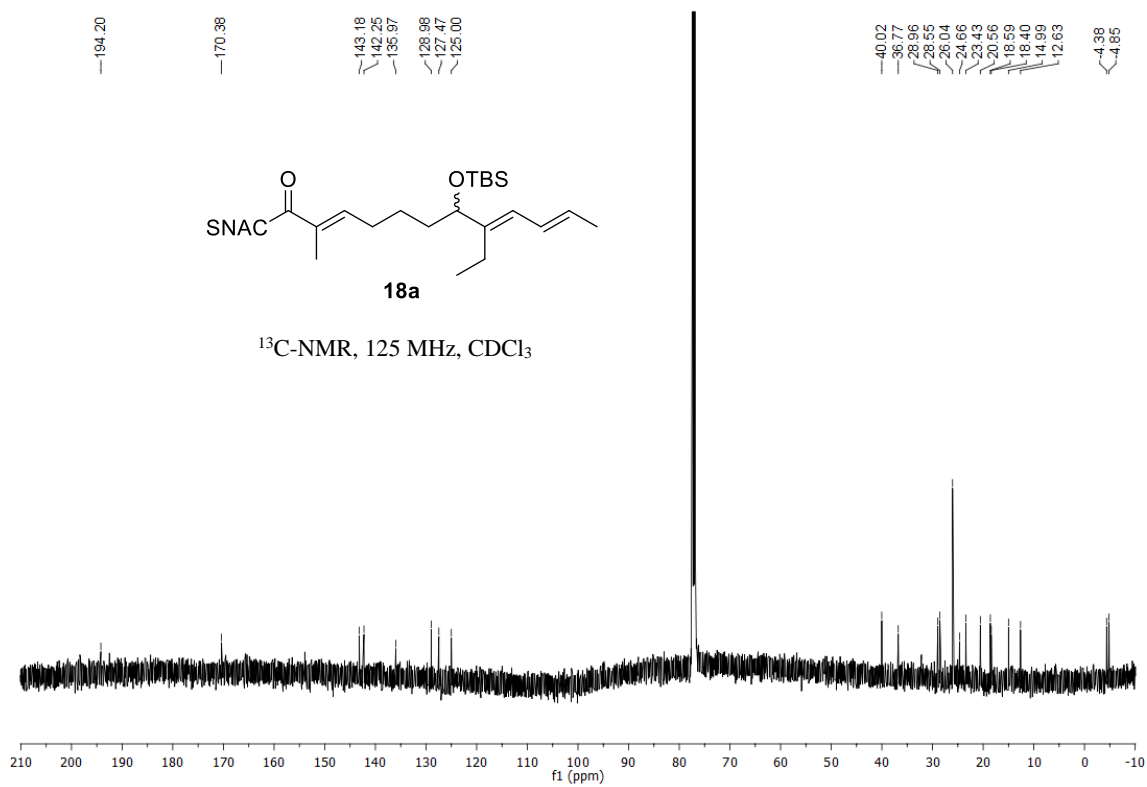

Figure S22:  $^{13}\text{C-NMR}$ -spectrum of  $\alpha,\beta$ -unsaturated thioester **18a** in  $\text{CDCl}_3$ .

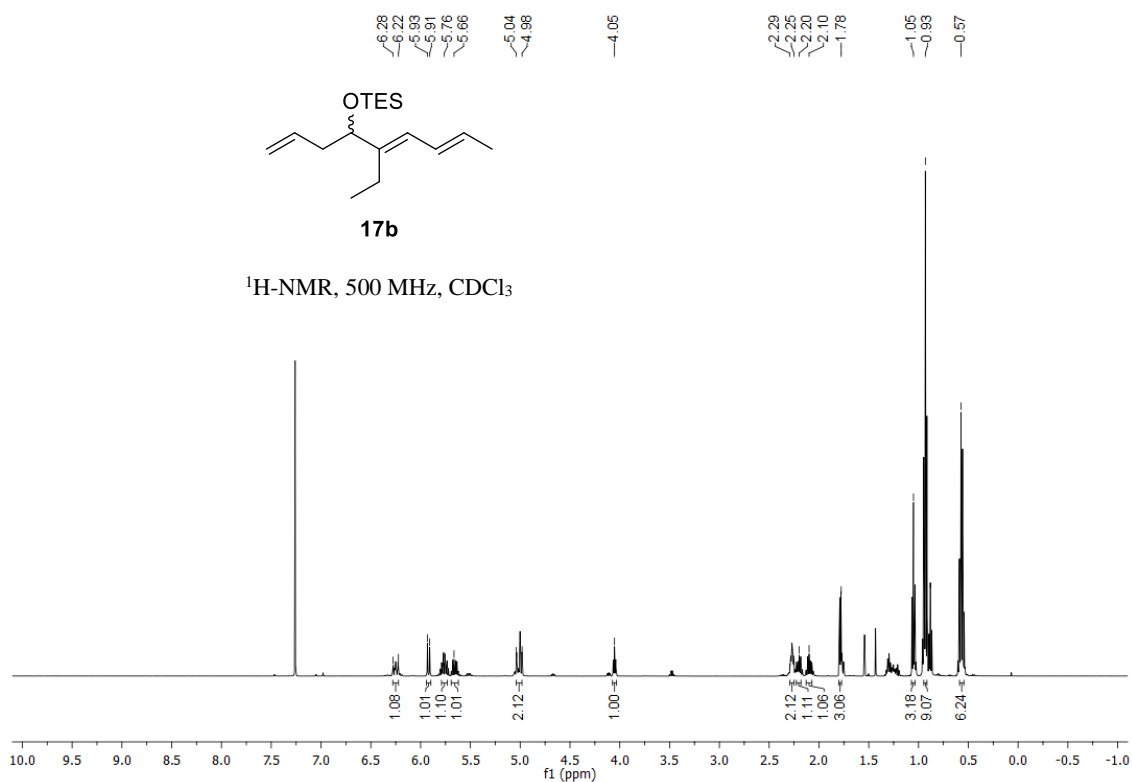

Figure S23: <sup>1</sup>H-NMR-spectrum of silyl ether **17b** in CDCl<sub>3</sub>.

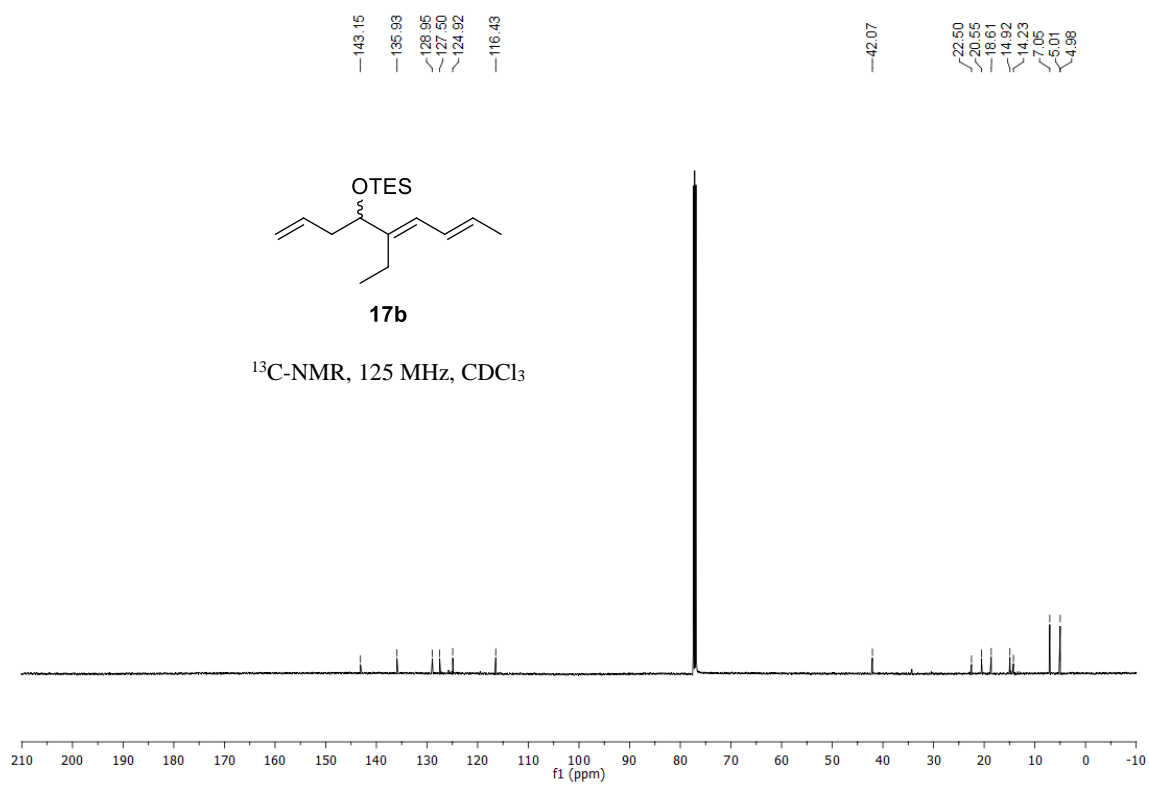

Figure S24: <sup>13</sup>C-NMR-spectrum of silyl ether **17b** in CDCl<sub>3</sub>.

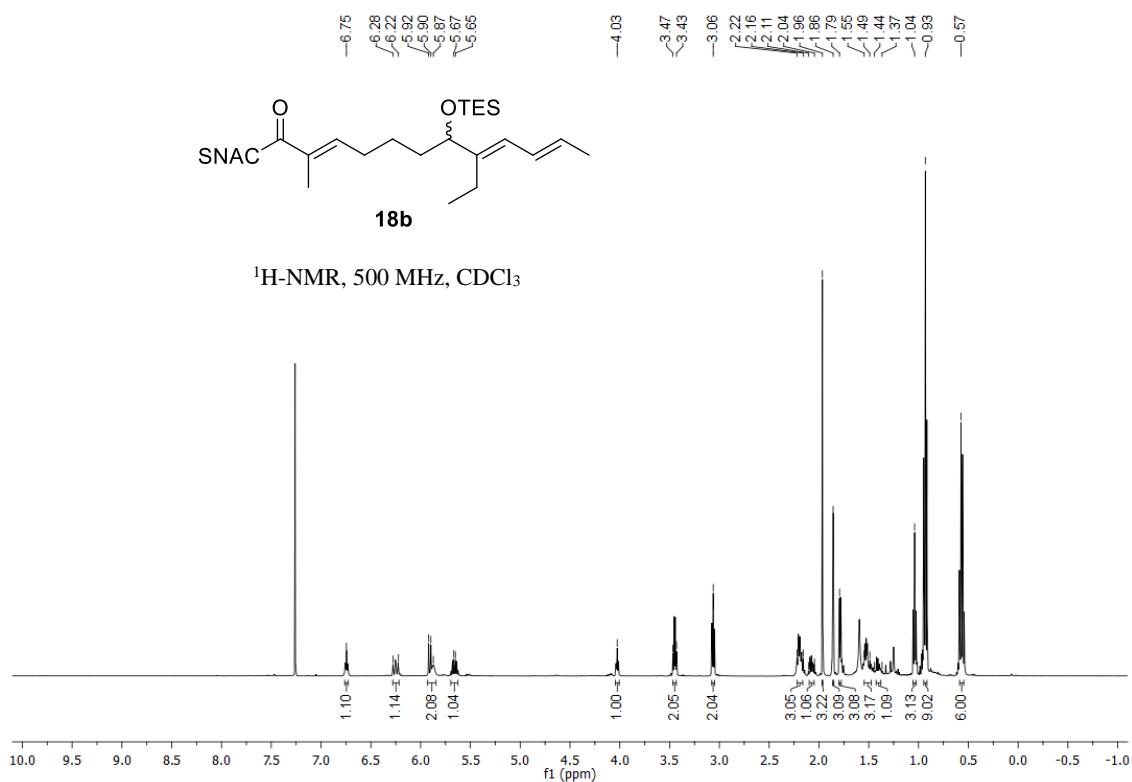

Figure S25:  $^1\text{H}$ -NMR-spectrum of  $\alpha,\beta$ -unsaturated thioester **18b** in  $\text{CDCl}_3$ .

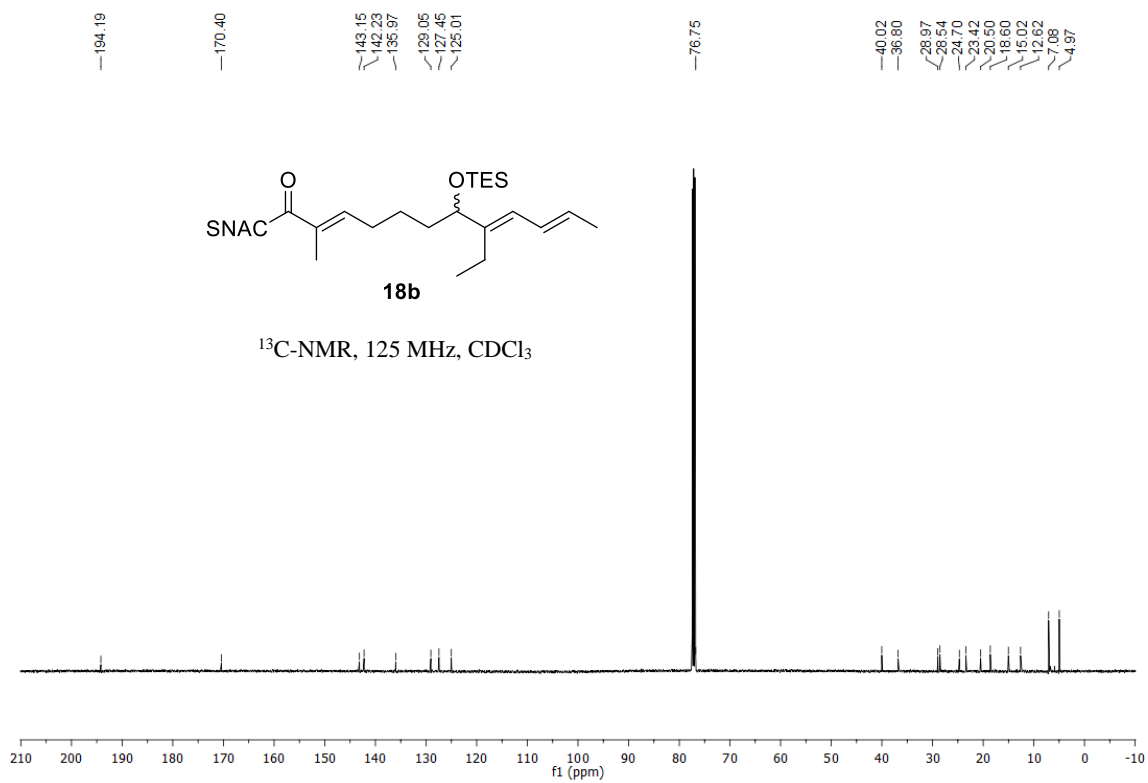

Figure S26:  $^{13}\text{C}$ -NMR-spectrum of  $\alpha,\beta$ -unsaturated thioester **18b** in  $\text{CDCl}_3$ .

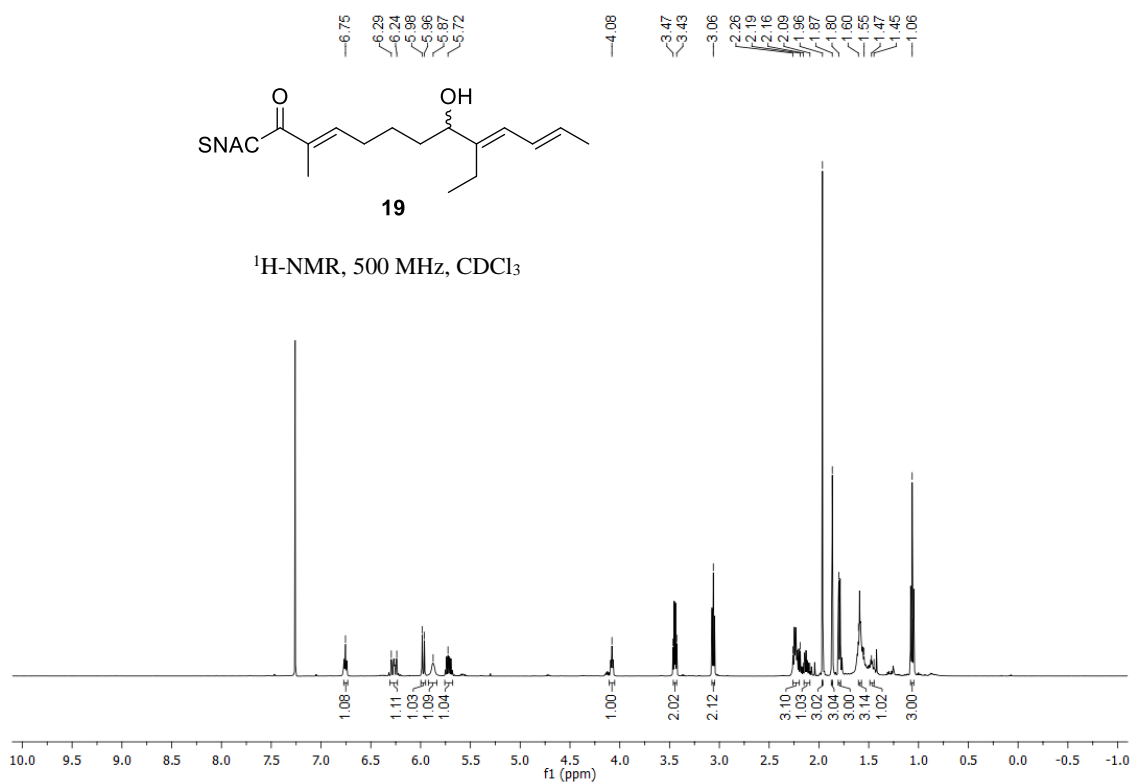

Figure S27: <sup>1</sup>H-NMR-spectrum of α,β-unsaturated thioester **19** in CDCl<sub>3</sub>.

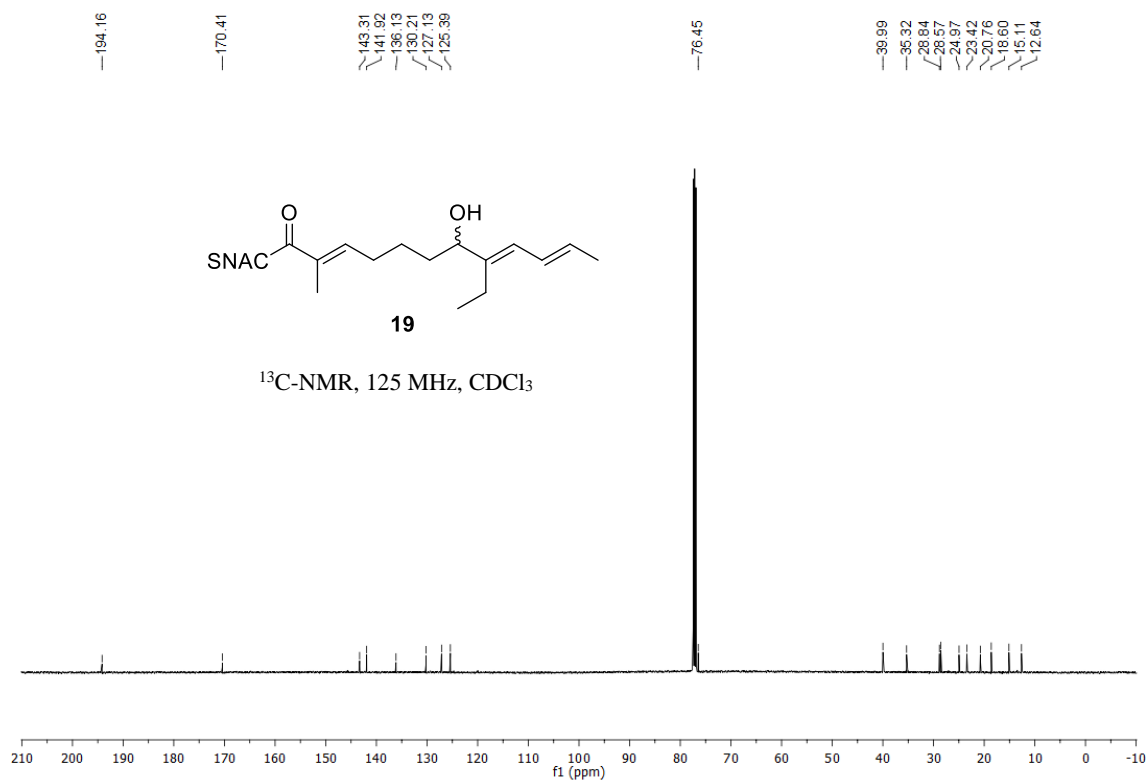

Figure S28: <sup>13</sup>C-NMR-spectrum of α,β-unsaturated thioester **19** in CDCl<sub>3</sub>.

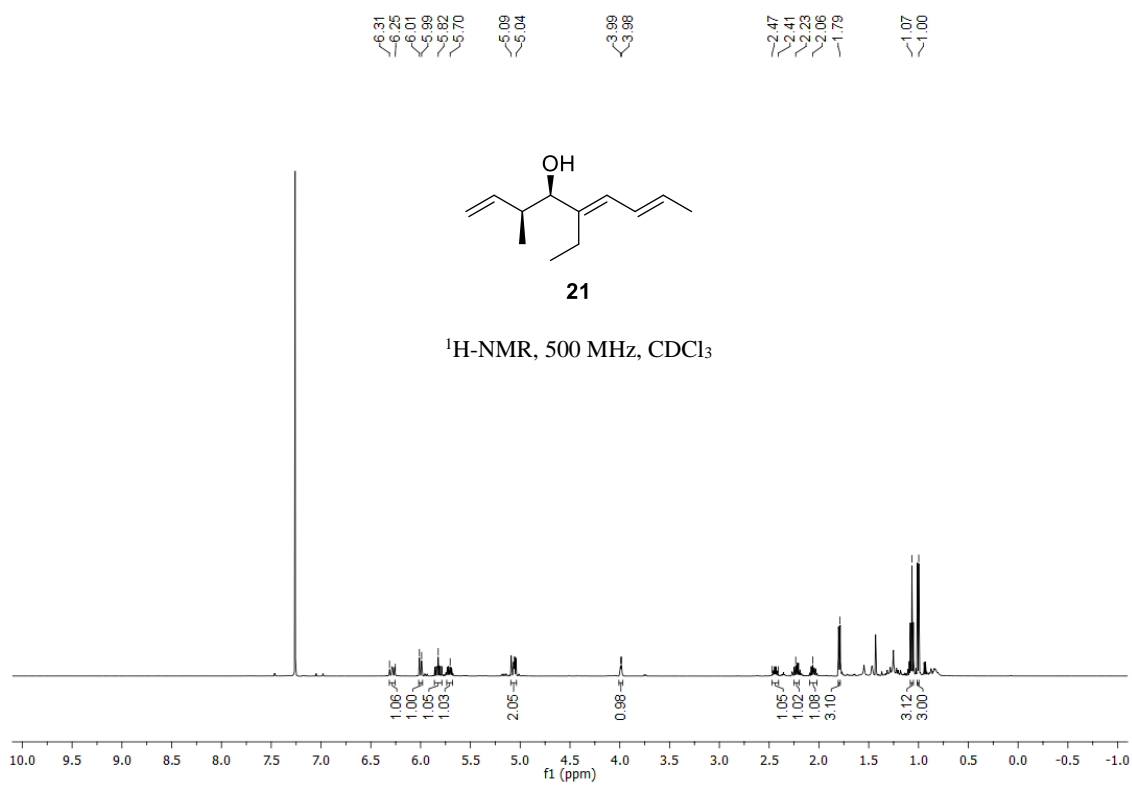

Figure S29: <sup>1</sup>H-NMR-spectrum of secondary alcohol **21** in CDCl<sub>3</sub>.

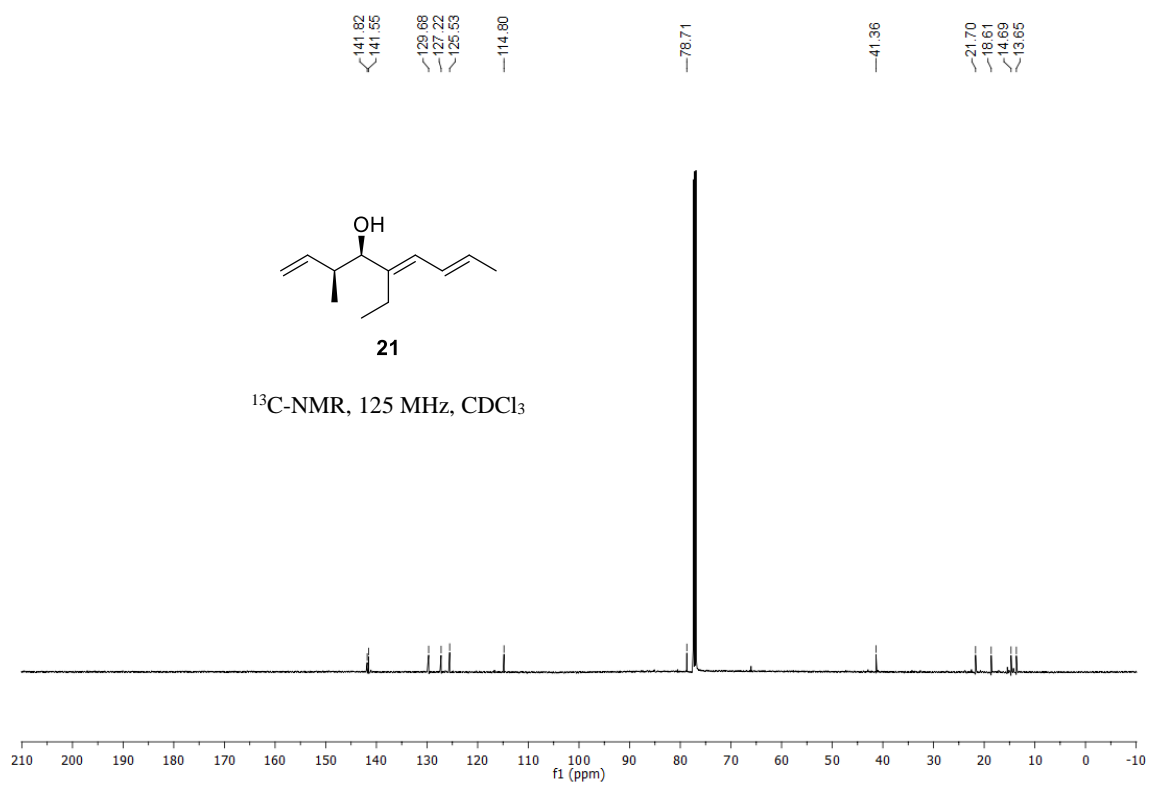

Figure S30: <sup>13</sup>C-NMR-spectrum of secondary alcohol **21** in CDCl<sub>3</sub>.

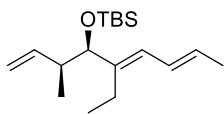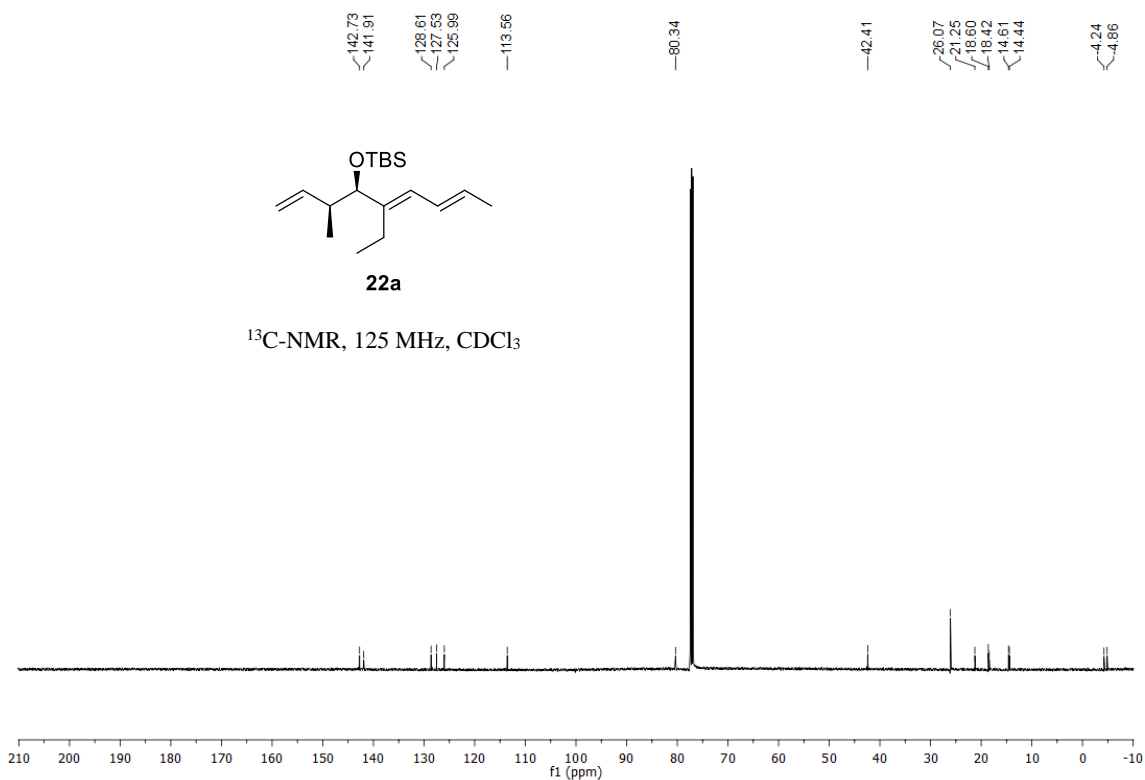

Figure S32:  $^{13}\text{C}$ -NMR-spectrum of silyl ether **22a** in  $\text{CDCl}_3$ .

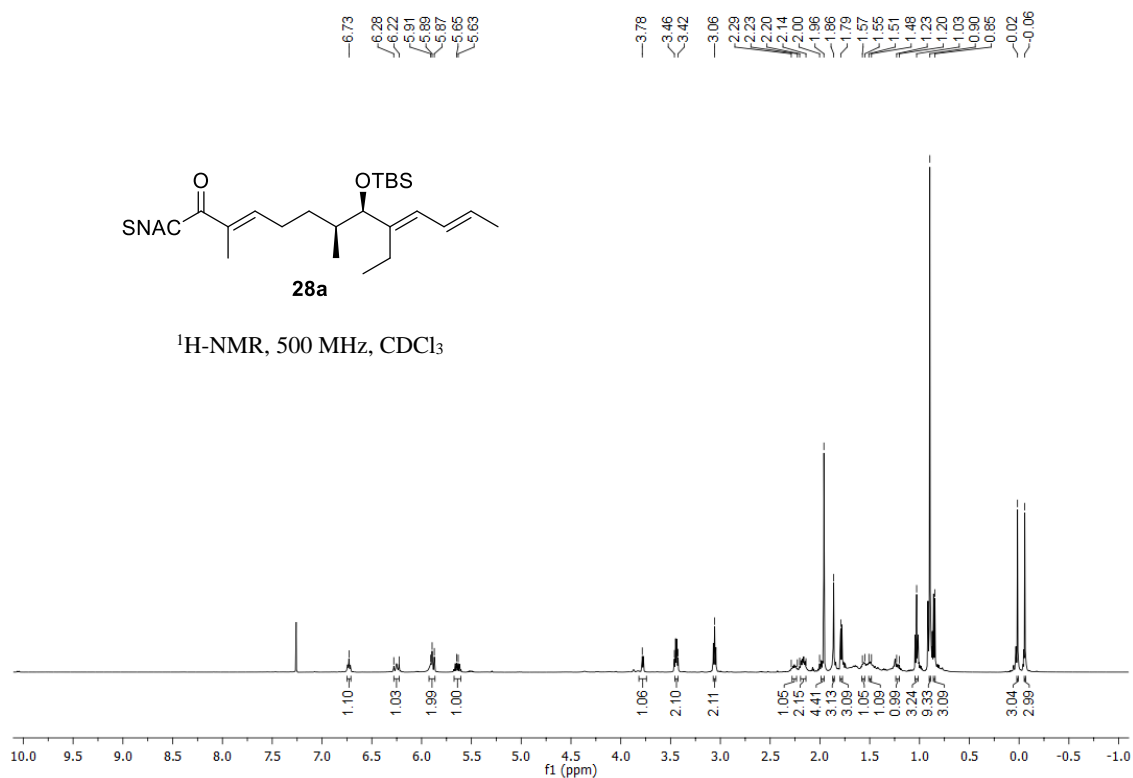

Figure S33:  $^1\text{H}$ -NMR-spectrum of  $\alpha,\beta$ -unsaturated thioester **23a** in  $\text{CDCl}_3$ .

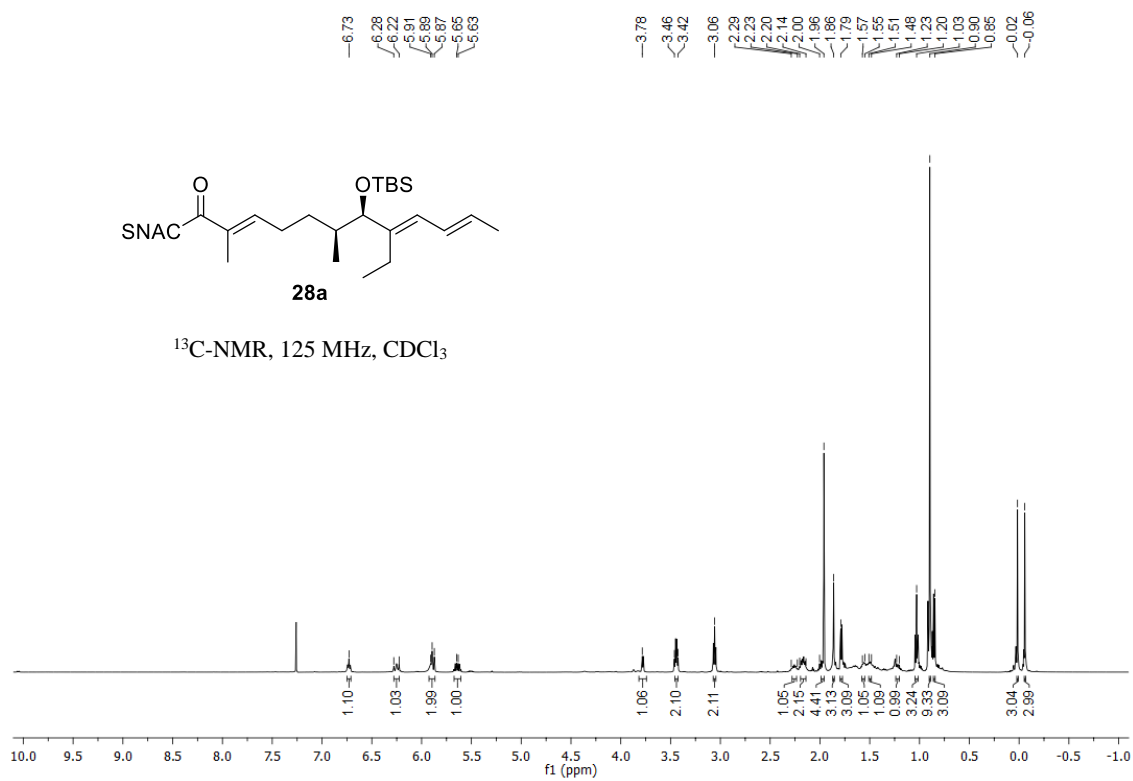

Figure S34:  $^{13}\text{C}$ -NMR-spectrum of  $\alpha,\beta$ -unsaturated thioester **23a** in  $\text{CDCl}_3$ .

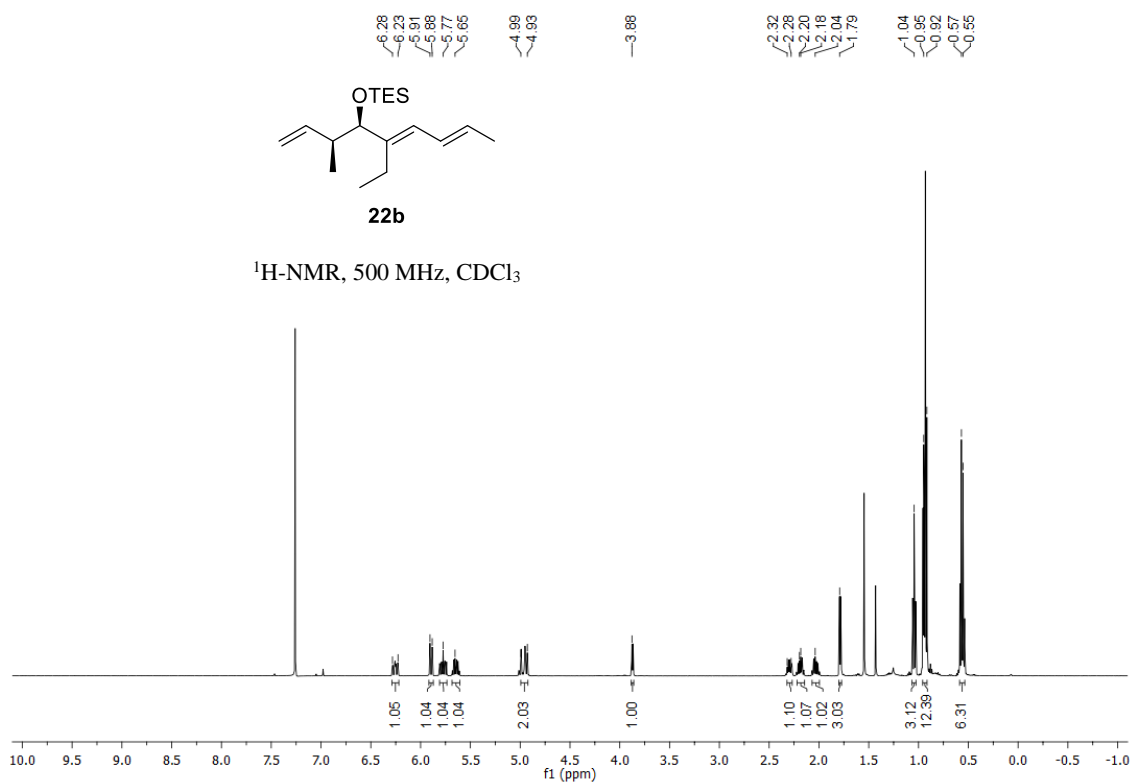

Figure S35: <sup>1</sup>H-NMR-spectrum of silyl ether **22b** in CDCl<sub>3</sub>.

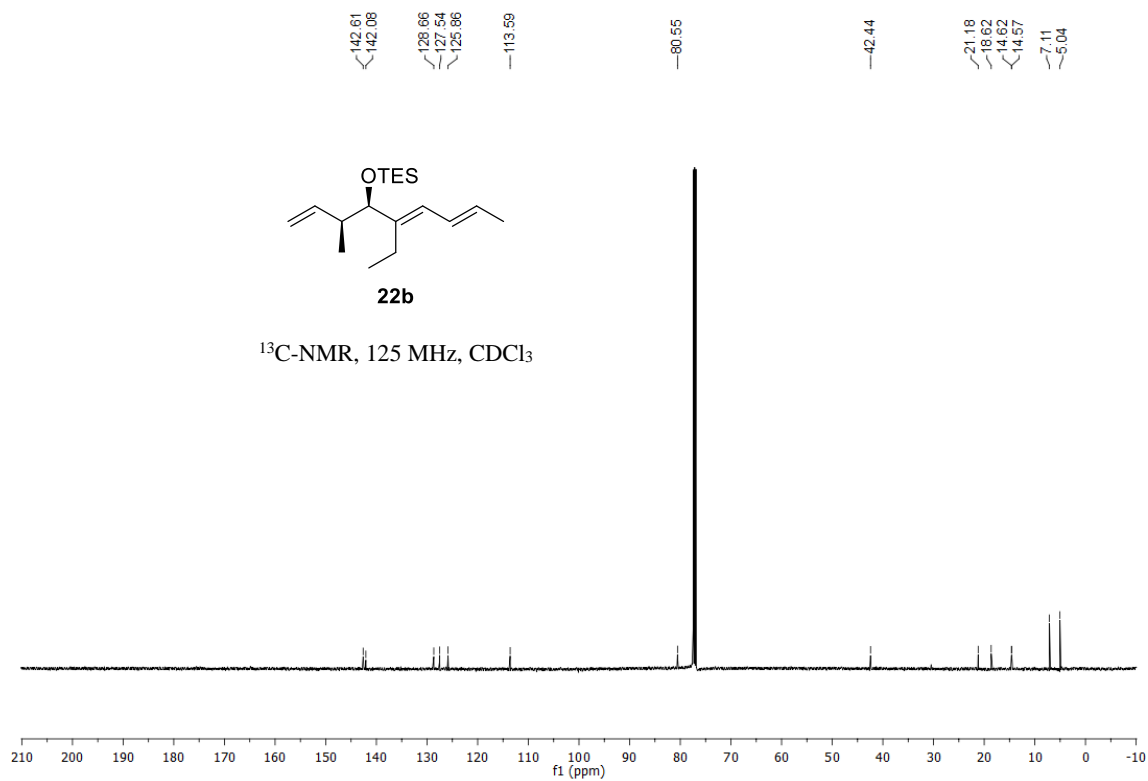

Figure S36: <sup>13</sup>C-NMR-spectrum of silyl ether **22b** in CDCl<sub>3</sub>.

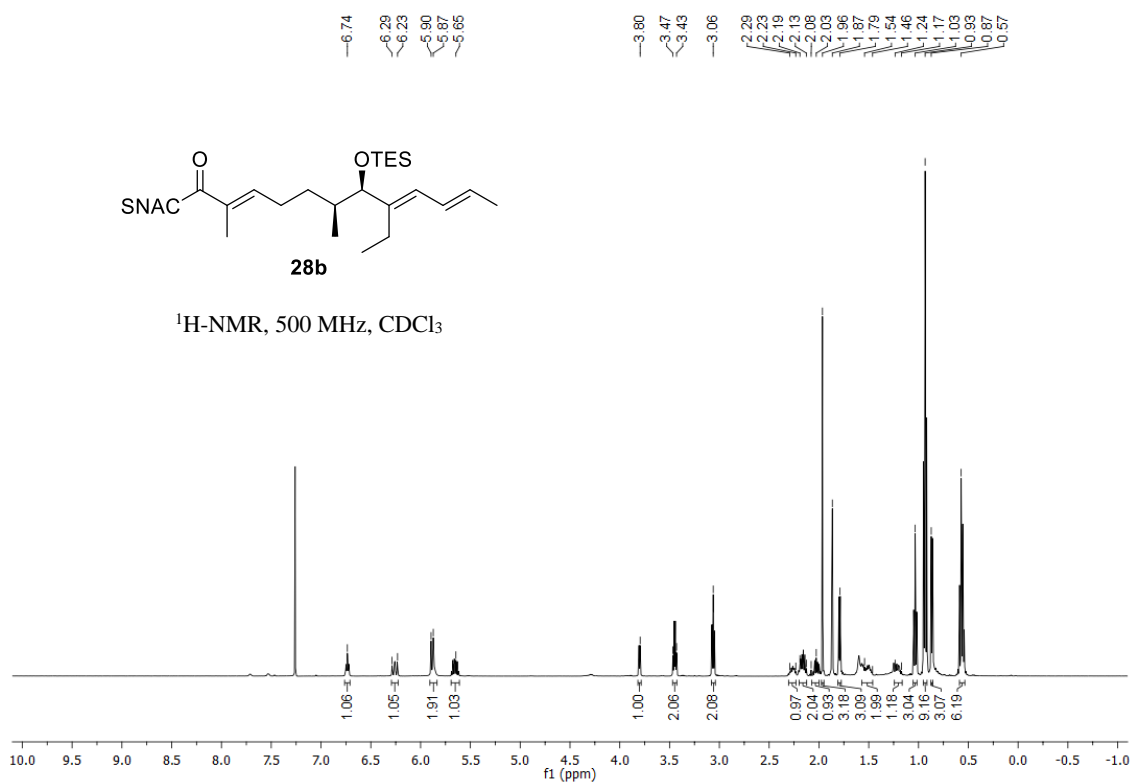

Figure S37:  $^1\text{H}$ -NMR-spectrum of  $\alpha,\beta$ -unsaturated thioester **28b** in  $\text{CDCl}_3$ .

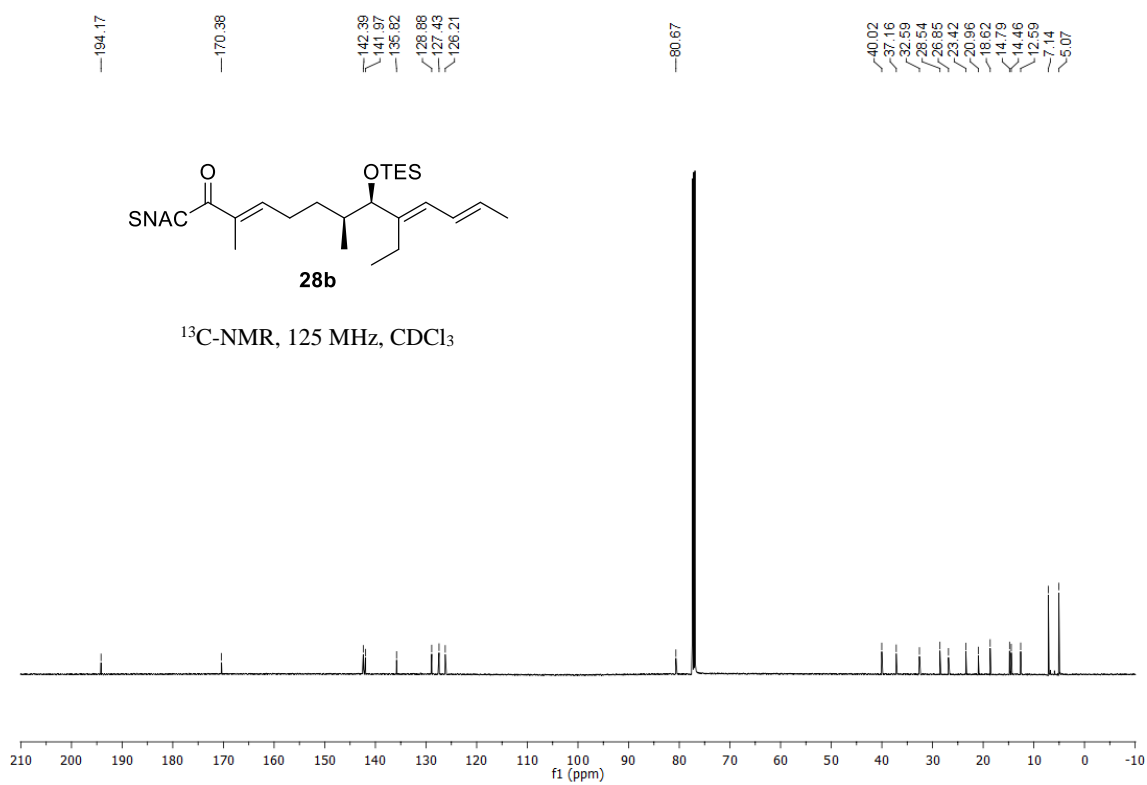

Figure S38:  $^{13}\text{C}$ -NMR-spectrum of  $\alpha,\beta$ -unsaturated thioester **28b** in  $\text{CDCl}_3$ .

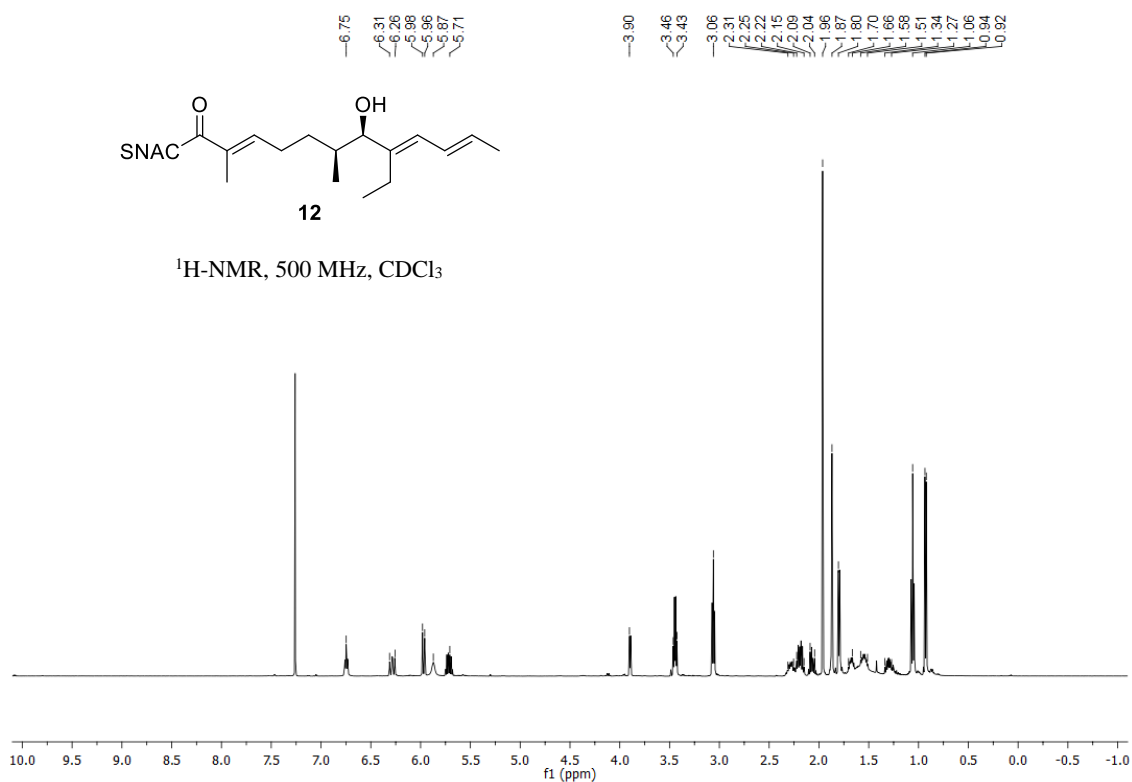

Figure S39:  $^1\text{H}$ -NMR-spectrum of  $\alpha,\beta$ -unsaturated thioester **12** in  $\text{CDCl}_3$ .

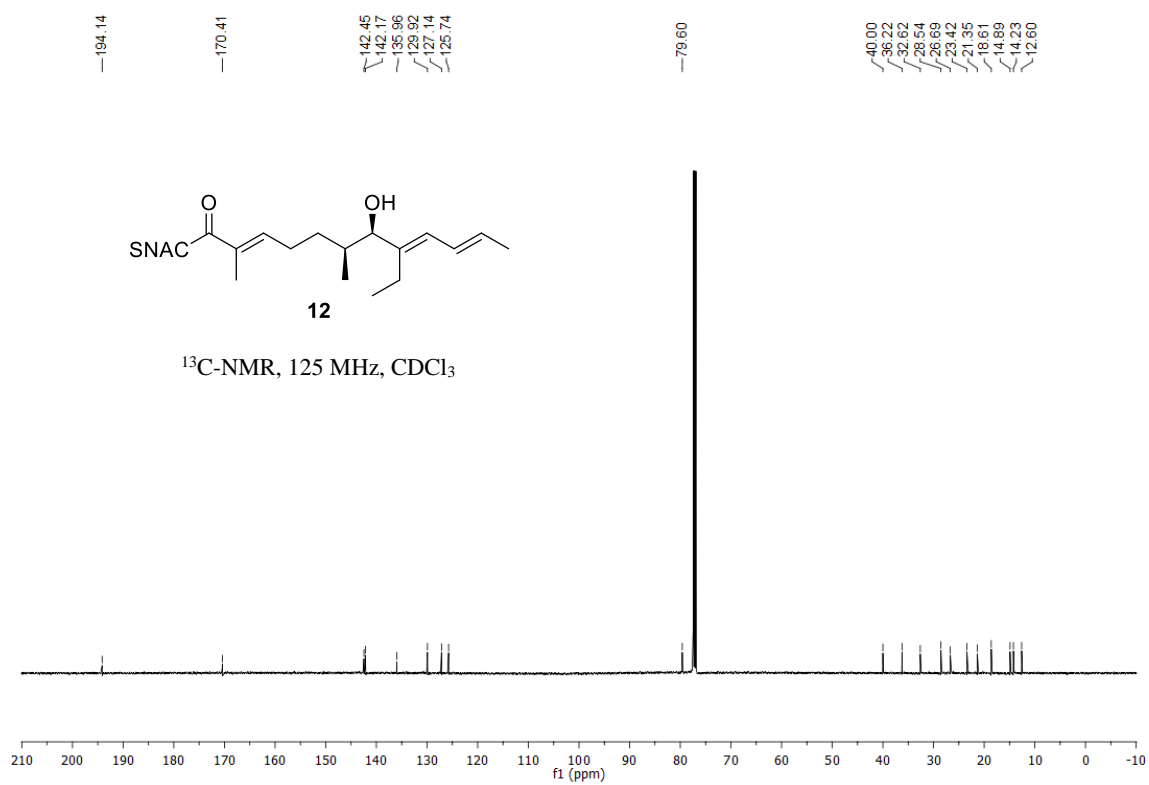

Figure S40:  $^{13}\text{C}$ -NMR-spectrum of  $\alpha,\beta$ -unsaturated thioester **12** in  $\text{CDCl}_3$ .

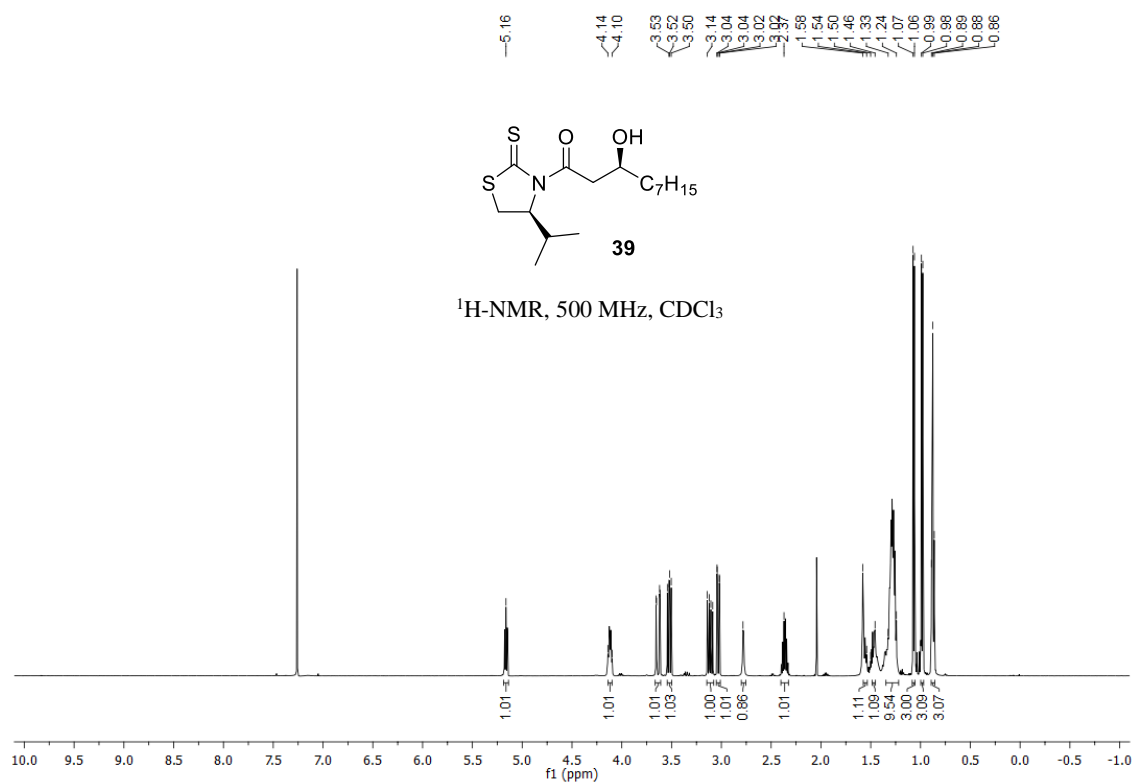

Figure S41: <sup>1</sup>H-NMR-spectrum of secondary alcohol **39** in CDCl<sub>3</sub>.

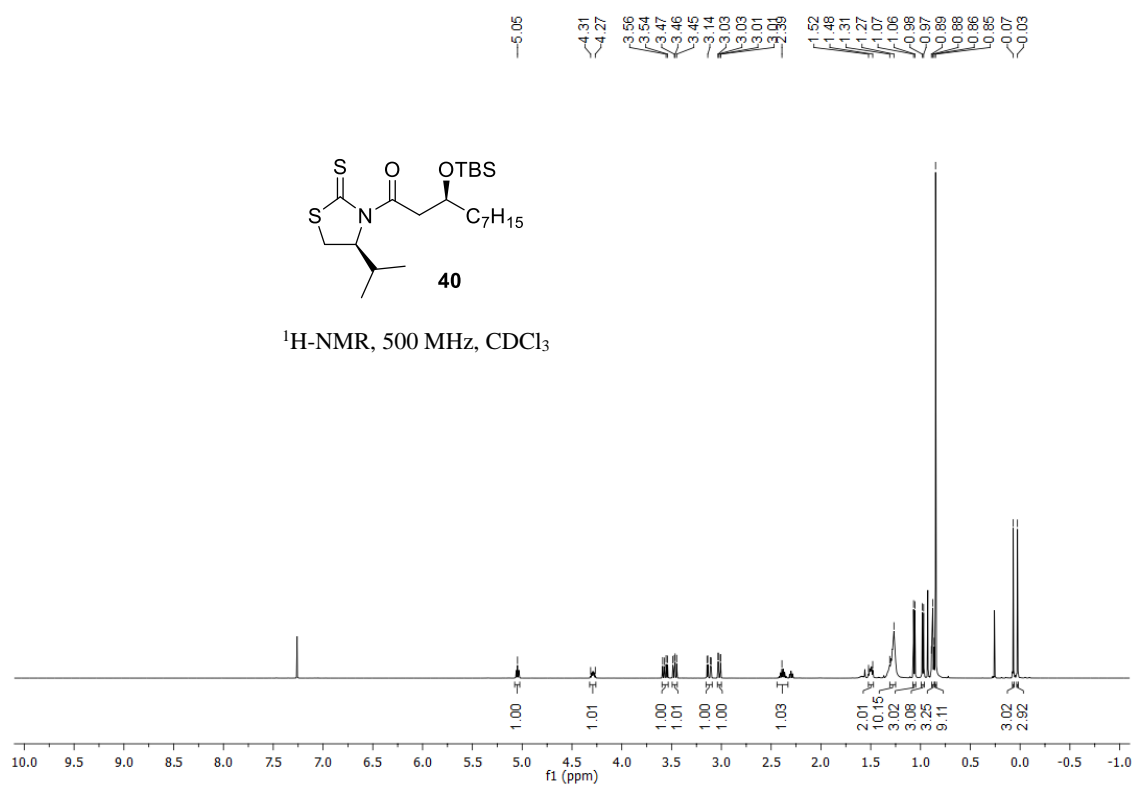

Figure S42: <sup>1</sup>H-NMR-spectrum of silyl ether **40** in CDCl<sub>3</sub>.

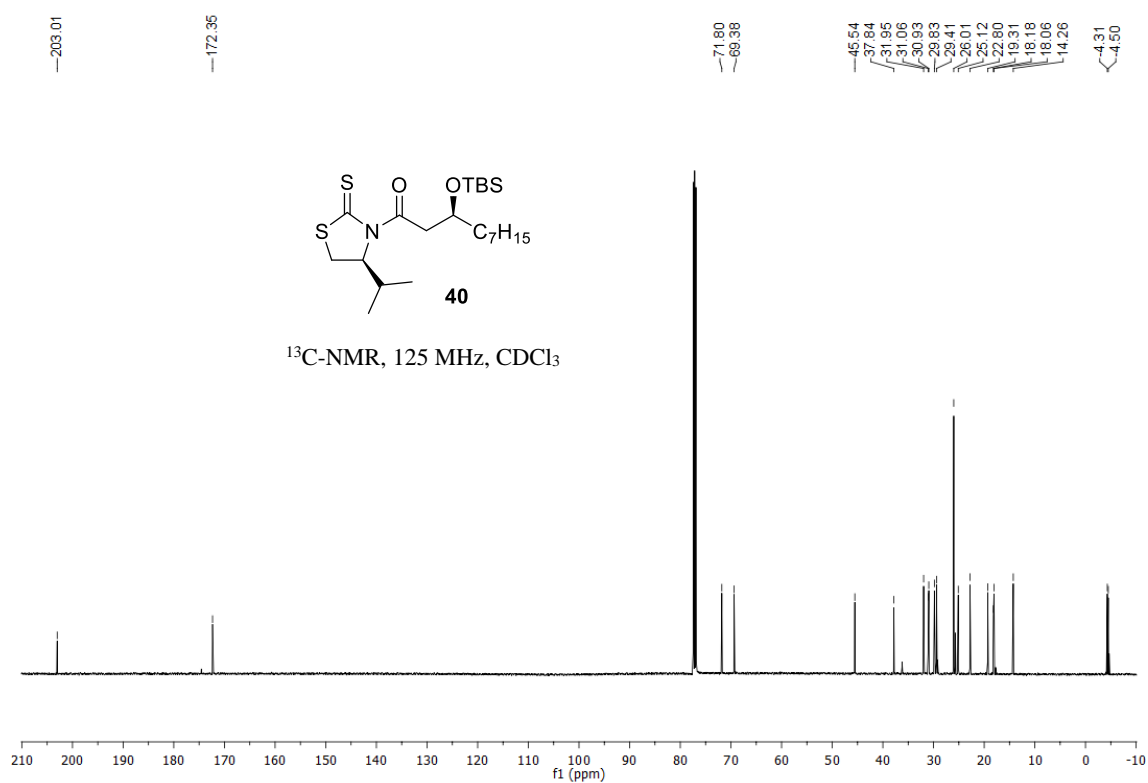

Figure S43:  $^{13}\text{C}$ -NMR-spectrum of silyl ether **40** in  $\text{CDCl}_3$ .

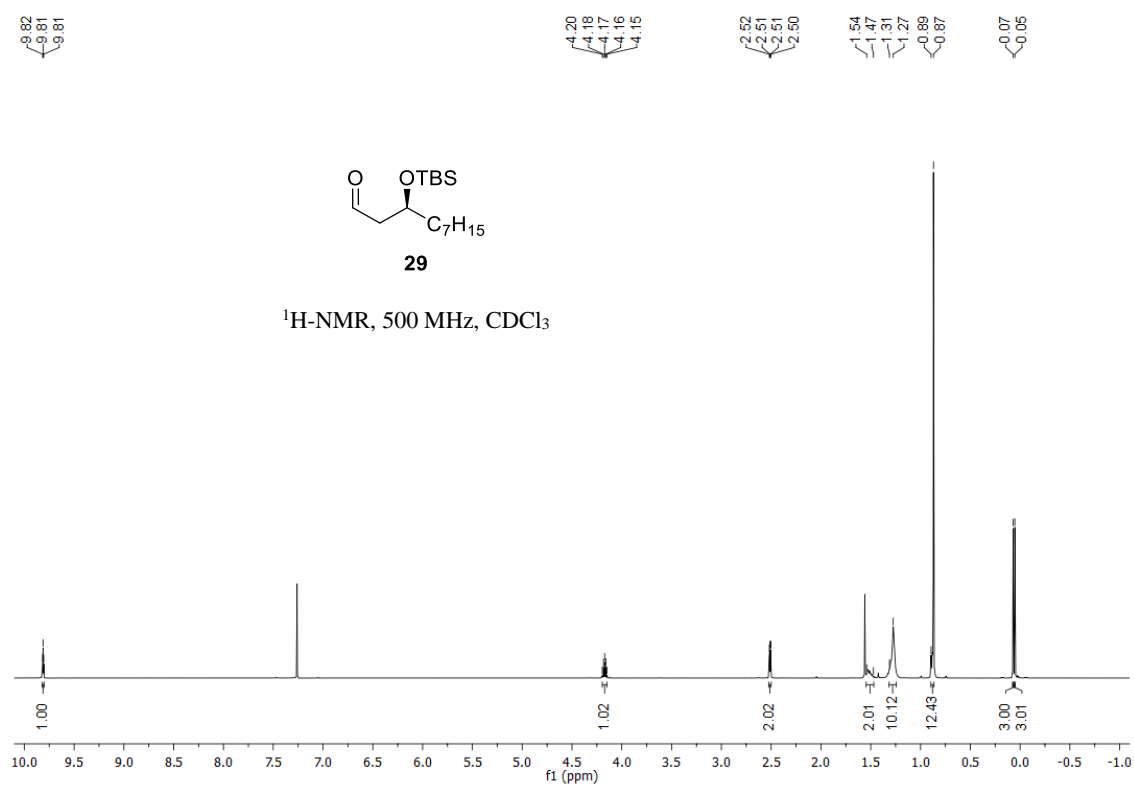

Figure S44:  $^1\text{H}$ -NMR-spectrum of aldehyde **29** in  $\text{CDCl}_3$ .

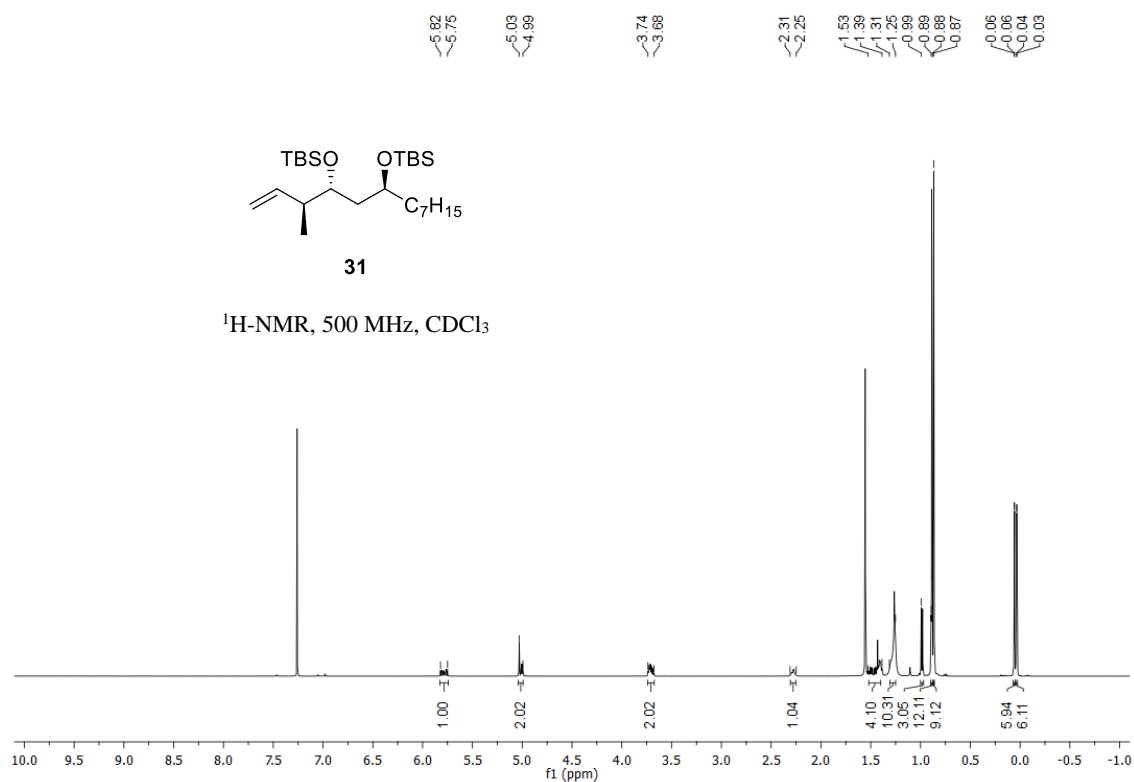

Figure S45: <sup>1</sup>H-NMR-spectrum of terminal alkene **31** in CDCl<sub>3</sub>.

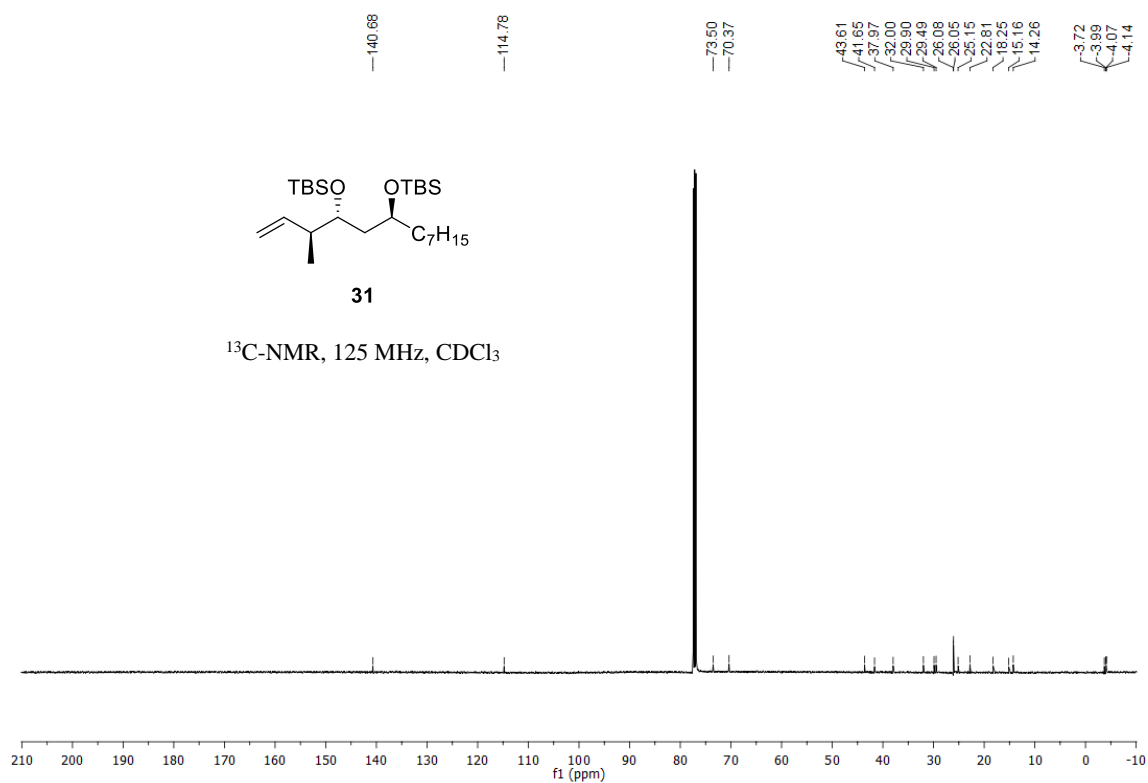

Figure S46: <sup>13</sup>C-NMR-spectrum of terminal alkene **31** in CDCl<sub>3</sub>.

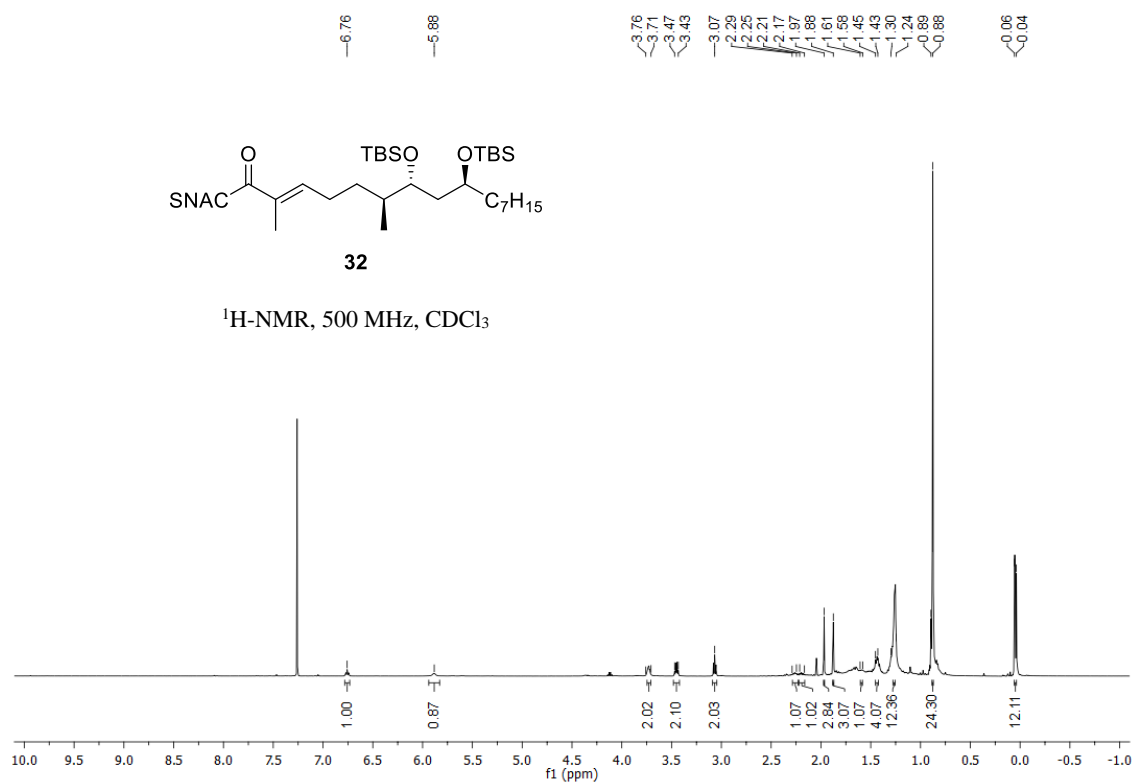

Figure S47: <sup>1</sup>H-NMR-spectrum of α,β-unsaturated thioester **32** in CDCl<sub>3</sub>.

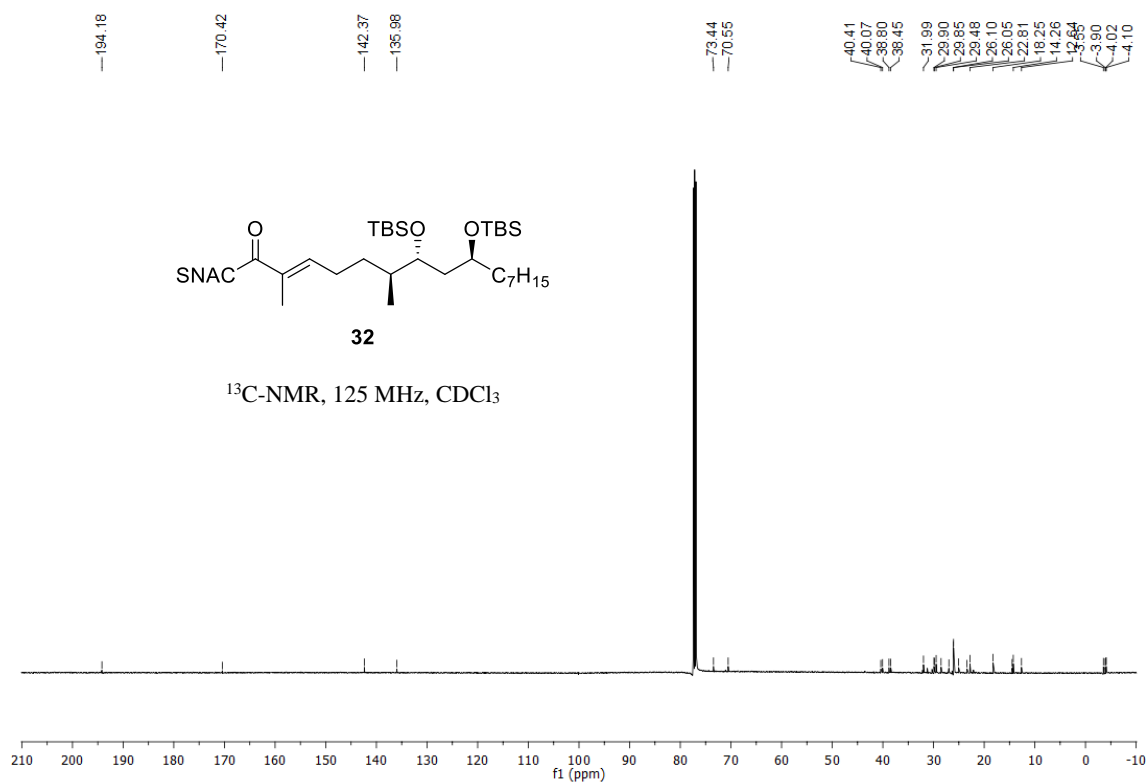

Figure S48: <sup>13</sup>C-NMR-spectrum of α,β-unsaturated thioester **32** in CDCl<sub>3</sub>.

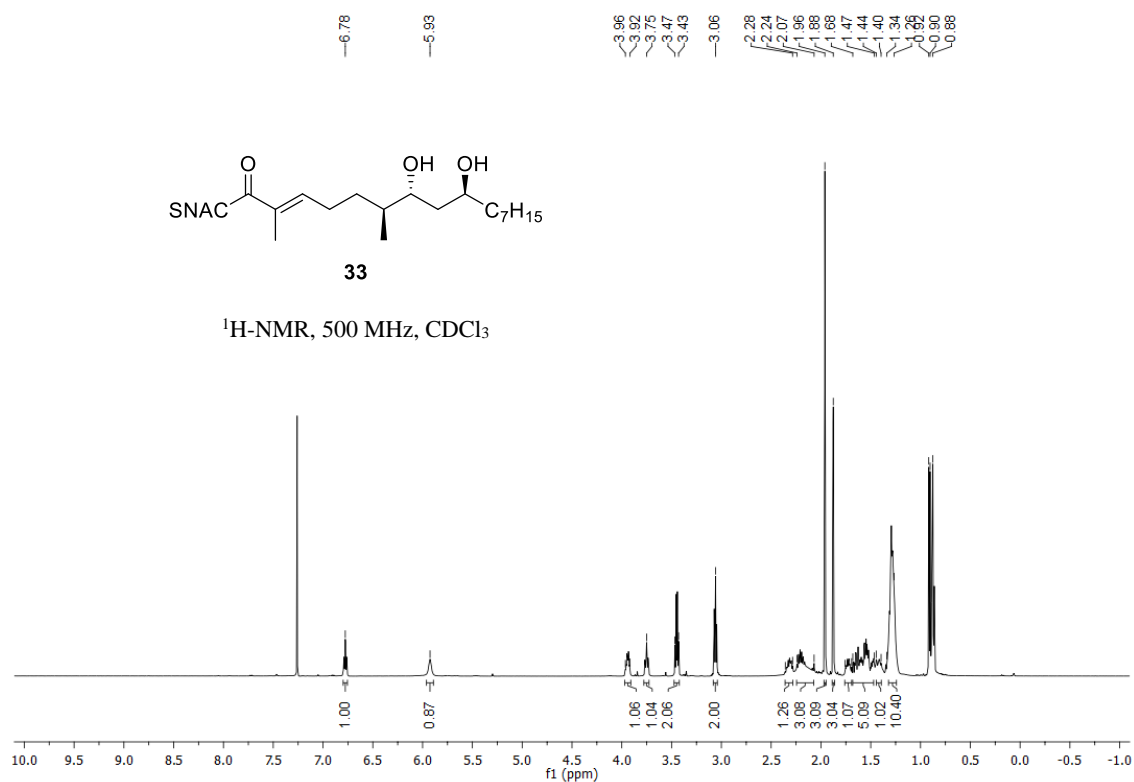

Figure S49: <sup>1</sup>H-NMR-spectrum of α,β-unsaturated thioester **33** in CDCl<sub>3</sub>.

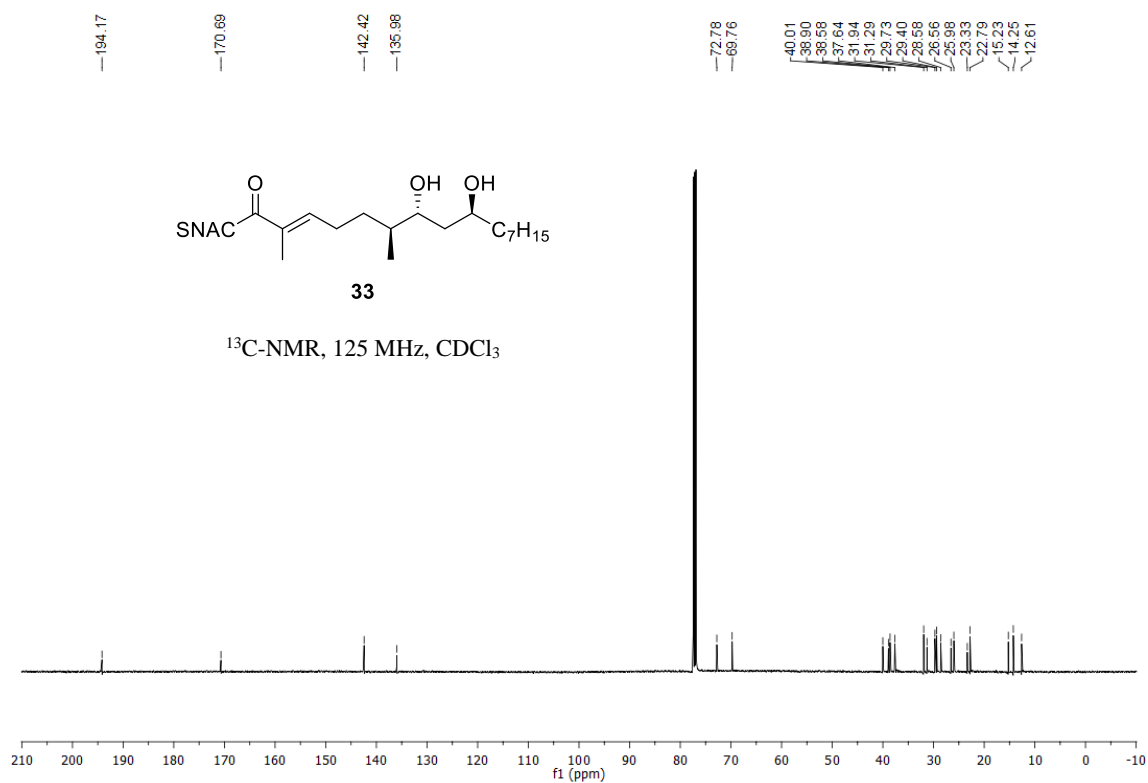

Figure S50: <sup>13</sup>C-NMR-spectrum of α,β-unsaturated thioester **33** in CDCl<sub>3</sub>.
